# Supplementary material for: Key salutogenic factors associated with wellbeing among a cohort of regional and rural healthcare workers during the COVID-19 pandemic: an exposure-wide cross-sectional study
Source: Research Square preprint supplement (doi:10.21203/rs.3.rs-7452925/v1), 2025-10-01
Supplement: Supplementary file 1 [file 1f5756a9dd890bca1c643298.docx]

# S3 Table. Code provided for each individual candidate exposure with life satisfaction outcome association. Directed acyclic graph (DAG) code to use in software application daggity.net

# Sociodemographic factors

## Age and Life Satisfaction

dag {

bb="0,0,1,1"

"Life Satisfaction" [outcome,pos="0.671,0.508"]

Age [exposure,pos="0.285,0.513"]

Age -> "Life Satisfaction"

}

## Sex at birth and Life Satisfaction

dag {

bb="0,0,1,1"

"Life Satisfaction" [outcome,pos="0.671,0.508"]

"Sex at birth" [exposure,pos="0.285,0.513"]

"Sex at birth" -> "Life Satisfaction"

}

## Rurality and Life Satisfaction

dag {

bb="0,0,1,1"

"Age group" [pos="0.068,0.179"]

"Compassion fatigue" [latent,pos="0.852,0.465"]

"Depressive symptoms" [pos="0.841,0.222"]

"Education level" [pos="0.356,0.037"]

"Employment status" [pos="0.078,0.425"]

"Health S Utilisation" [pos="0.893,0.089"]

"Income concerns" [pos="0.211,0.170"]

"Job satisfaction" [pos="0.775,0.153"]

"Job stress" [pos="0.663,0.192"]

"Life Satisfaction" [outcome,pos="0.671,0.508"]

"Neigh trust" [pos="0.340,0.912"]

"Psych safety" [pos="0.736,0.285"]

"Self-efficacy" [pos="0.433,0.087"]

"Self-reported health" [pos="0.064,0.699"]

"Sex at birth" [pos="0.070,0.050"]

"Social media" [pos="0.061,0.875"]

"Social support" [pos="0.898,0.771"]

"Work engage" [pos="0.512,0.908"]

"Workplace prep" [pos="0.583,0.940"]

"life events" [pos="0.236,0.925"]

Alcohol [pos="0.727,0.918"]

Anxiety [pos="0.686,0.039"]

BMI [pos="0.941,0.874"]

Burnout [pos="0.905,0.399"]

Control [pos="0.756,0.784"]

FoC [pos="0.950,0.755"]

Income [pos="0.154,0.054"]

Optimism [pos="0.912,0.565"]

PA [pos="0.664,0.918"]

Profession [pos="0.355,0.372"]

Purpose [pos="0.546,0.150"]

Redeployed [pos="0.432,0.931"]

Resilience [pos="0.947,0.661"]

Rurality [exposure,pos="0.249,0.515"]

SOC [pos="0.748,0.680"]

Shiftwork [pos="0.045,0.558"]

Sleep [pos="0.843,0.886"]

Smoking [pos="0.791,0.908"]

WFH [pos="0.432,0.835"]

"Age group" -> "Life Satisfaction"

"Age group" -> Rurality

"Compassion fatigue" -> "Life Satisfaction"

"Depressive symptoms" -> "Life Satisfaction"

"Education level" -> "Life Satisfaction"

"Education level" -> Income

"Education level" -> Rurality

"Employment status" -> "Life Satisfaction"

"Employment status" -> Income

"Income concerns" -> "Life Satisfaction"

"Income concerns" -> Rurality

"Job satisfaction" -> "Life Satisfaction"

"Job stress" -> "Job satisfaction"

"Job stress" -> "Life Satisfaction"

"Job stress" -> Anxiety

"Life Satisfaction" -> "Health S Utilisation"

"Life Satisfaction" -> Alcohol

"Life Satisfaction" -> Smoking

"Neigh trust" -> "Life Satisfaction"

"Psych safety" -> "Depressive symptoms"

"Psych safety" -> "Job satisfaction"

"Psych safety" -> "Life Satisfaction"

"Psych safety" -> Anxiety

"Self-efficacy" -> "Life Satisfaction"

"Self-efficacy" -> Resilience

"Self-reported health" -> "Life Satisfaction"

"Sex at birth" -> "Life Satisfaction"

"Sex at birth" -> Rurality

"Social media" -> "Life Satisfaction"

"Social support" -> "Life Satisfaction"

"Work engage" -> "Life Satisfaction"

"Workplace prep" -> "Life Satisfaction"

"life events" -> "Life Satisfaction"

Alcohol -> Smoking

Anxiety -> "Depressive symptoms"

Anxiety -> "Life Satisfaction"

BMI -> "Life Satisfaction"

BMI -> Sleep

Burnout -> "Life Satisfaction"

Control -> "Life Satisfaction"

FoC -> "Life Satisfaction"

Income -> "Income concerns"

Income -> "Life Satisfaction"

Income -> Rurality

Optimism -> "Depressive symptoms"

Optimism -> "Life Satisfaction"

PA -> "Life Satisfaction"

PA -> Sleep

Profession -> "Life Satisfaction"

Profession -> Rurality

Purpose -> "Life Satisfaction"

Redeployed -> "Life Satisfaction"

Resilience -> "Life Satisfaction"

Rurality -> "Compassion fatigue"

Rurality -> "Depressive symptoms"

Rurality -> "Health S Utilisation"

Rurality -> "Job satisfaction"

Rurality -> "Job stress"

Rurality -> "Life Satisfaction"

Rurality -> "Neigh trust"

Rurality -> "Psych safety"

Rurality -> "Self-reported health"

Rurality -> "Social media"

Rurality -> "Social support"

Rurality -> "Work engage"

Rurality -> "Workplace prep"

Rurality -> "life events"

Rurality -> Alcohol

Rurality -> Anxiety

Rurality -> BMI

Rurality -> Burnout

Rurality -> Control

Rurality -> FoC

Rurality -> Optimism

Rurality -> PA

Rurality -> Redeployed

Rurality -> Resilience

Rurality -> Shiftwork

Rurality -> Sleep

Rurality -> Smoking

Rurality -> WFH

SOC -> "Life Satisfaction"

Shiftwork -> "Life Satisfaction"

Sleep -> "Life Satisfaction"

WFH -> "Life Satisfaction"

}

## Rurality (updated DAG using new exposure shortlist)

dag {

bb="0,0,1,1"

"Age group" [pos="0.127,0.121"]

"Compassion fatigue" [latent,pos="0.631,0.056"]

"Depressive symptoms" [pos="0.296,0.059"]

"Education level" [pos="0.130,0.049"]

"Employment status" [pos="0.055,0.725"]

"Health S Utilisation" [pos="0.705,0.940"]

"Income concerns" [pos="0.050,0.356"]

"Job satisfaction" [pos="0.464,0.927"]

"Job stress" [pos="0.562,0.922"]

"Life Satisfaction" [outcome,pos="0.671,0.508"]

"Neigh trust" [pos="0.064,0.143"]

"Psych safety" [pos="0.634,0.918"]

"Self-efficacy" [pos="0.908,0.073"]

"Self-reported health" [pos="0.776,0.952"]

"Sex at birth" [pos="0.034,0.603"]

"Social media" [pos="0.049,0.260"]

"Social support" [pos="0.968,0.343"]

"Work engage" [pos="0.306,0.935"]

"Workplace prep" [pos="0.391,0.930"]

"life events" [pos="0.205,0.044"]

Alcohol [pos="0.863,0.955"]

Anxiety [pos="0.464,0.031"]

BMI [pos="0.961,0.749"]

Burnout [pos="0.562,0.039"]

Control [pos="0.960,0.229"]

Diet [pos="0.927,0.935"]

FoC [pos="0.956,0.570"]

Income [pos="0.048,0.471"]

Optimism [pos="0.744,0.021"]

PA [pos="0.963,0.661"]

Profession [pos="0.074,0.823"]

Purpose [pos="0.959,0.466"]

Redeployed [pos="0.219,0.934"]

Resilience [pos="0.824,0.045"]

Rurality [exposure,pos="0.249,0.515"]

SOC [pos="0.945,0.147"]

Shiftwork [pos="0.161,0.920"]

Sleep [pos="0.957,0.856"]

WFH [pos="0.091,0.903"]

"Age group" -> "Life Satisfaction"

"Compassion fatigue" -> "Life Satisfaction"

"Depressive symptoms" -> "Life Satisfaction"

"Education level" -> "Life Satisfaction"

"Education level" -> Rurality

"Employment status" -> "Life Satisfaction"

"Employment status" -> Income

"Income concerns" -> "Life Satisfaction"

"Job satisfaction" -> "Life Satisfaction"

"Job stress" -> "Job satisfaction"

"Job stress" -> "Life Satisfaction"

"Job stress" -> Anxiety

"Life Satisfaction" -> "Health S Utilisation"

"Life Satisfaction" -> Alcohol

"Life Satisfaction" <-> Rurality

"Neigh trust" -> "Life Satisfaction"

"Psych safety" -> "Depressive symptoms"

"Psych safety" -> "Job satisfaction"

"Psych safety" -> "Life Satisfaction"

"Psych safety" -> Anxiety

"Self-efficacy" -> "Life Satisfaction"

"Self-efficacy" -> Resilience

"Self-reported health" -> "Life Satisfaction"

"Sex at birth" -> "Life Satisfaction"

"Sex at birth" -> Rurality

"Social media" -> "Life Satisfaction"

"Social support" -> "Life Satisfaction"

"Work engage" -> "Life Satisfaction"

"Workplace prep" -> "Life Satisfaction"

"life events" -> "Life Satisfaction"

Anxiety -> "Depressive symptoms"

Anxiety -> "Life Satisfaction"

BMI -> "Life Satisfaction"

BMI -> Sleep

Burnout -> "Life Satisfaction"

Control -> "Life Satisfaction"

Diet -> "Life Satisfaction"

FoC -> "Life Satisfaction"

Income -> "Life Satisfaction"

Optimism -> "Depressive symptoms"

Optimism -> "Life Satisfaction"

PA -> "Life Satisfaction"

PA -> Sleep

Profession -> "Life Satisfaction"

Profession -> Rurality

Purpose -> "Life Satisfaction"

Redeployed -> "Life Satisfaction"

Resilience -> "Life Satisfaction"

Rurality -> "Compassion fatigue"

Rurality -> "Depressive symptoms"

Rurality -> "Employment status"

Rurality -> "Health S Utilisation"

Rurality -> "Income concerns"

Rurality -> "Job satisfaction"

Rurality -> "Job stress"

Rurality -> "Neigh trust"

Rurality -> "Psych safety"

Rurality -> "Self-reported health"

Rurality -> "Social media"

Rurality -> "Social support"

Rurality -> "Work engage"

Rurality -> "Workplace prep"

Rurality -> "life events"

Rurality -> Alcohol

Rurality -> Anxiety

Rurality -> BMI

Rurality -> Burnout

Rurality -> Control

Rurality -> Diet

Rurality -> FoC

Rurality -> Income

Rurality -> Optimism

Rurality -> PA

Rurality -> Redeployed

Rurality -> Resilience

Rurality -> Shiftwork

Rurality -> Sleep

Rurality -> WFH

SOC -> "Life Satisfaction"

Shiftwork -> "Life Satisfaction"

Sleep -> "Life Satisfaction"

WFH -> "Life Satisfaction"

}

## Income

dag {

bb="0,0,1,1"

"Age group" [pos="0.127,0.121"]

"Compassion fatigue" [latent,pos="0.631,0.056"]

"Depressive symptoms" [pos="0.296,0.059"]

"Education level" [pos="0.130,0.049"]

"Employment status" [pos="0.086,0.708"]

"Health S Utilisation" [pos="0.734,0.887"]

"Income concerns" [pos="0.050,0.356"]

"Job satisfaction" [pos="0.477,0.857"]

"Job stress" [pos="0.590,0.917"]

"Life Satisfaction" [outcome,pos="0.671,0.508"]

"Neigh trust" [pos="0.064,0.143"]

"Psych safety" [pos="0.630,0.817"]

"Self-efficacy" [pos="0.908,0.073"]

"Self-reported health" [pos="0.750,0.737"]

"Sex at birth" [pos="0.072,0.597"]

"Social media" [pos="0.049,0.260"]

"Social support" [pos="0.947,0.348"]

"Work engage" [pos="0.315,0.864"]

"Workplace prep" [pos="0.401,0.900"]

"life events" [pos="0.215,0.030"]

Alcohol [pos="0.834,0.890"]

Anxiety [pos="0.464,0.031"]

BMI [pos="0.961,0.749"]

Burnout [pos="0.562,0.039"]

Control [pos="0.960,0.229"]

Diet [pos="0.912,0.903"]

FoC [pos="0.956,0.570"]

Income [exposure,pos="0.249,0.515"]

Optimism [pos="0.744,0.021"]

PA [pos="0.963,0.661"]

Profession [pos="0.074,0.823"]

Purpose [pos="0.959,0.466"]

Redeployed [pos="0.236,0.897"]

Resilience [pos="0.824,0.045"]

Rurality [pos="0.048,0.471"]

SOC [pos="0.945,0.147"]

Shiftwork [pos="0.161,0.920"]

Sleep [pos="0.957,0.856"]

WFH [pos="0.091,0.903"]

"Age group" -> "Life Satisfaction"

"Age group" -> Income

"Compassion fatigue" -> "Life Satisfaction"

"Depressive symptoms" -> "Life Satisfaction"

"Education level" -> "Life Satisfaction"

"Education level" -> Income

"Employment status" -> "Life Satisfaction"

"Employment status" -> Income

"Employment status" -> Rurality

"Income concerns" -> "Life Satisfaction"

"Job satisfaction" -> "Life Satisfaction"

"Job stress" -> "Job satisfaction"

"Job stress" -> "Life Satisfaction"

"Job stress" -> Anxiety

"Life Satisfaction" -> "Health S Utilisation"

"Life Satisfaction" -> Alcohol

"Life Satisfaction" <-> Income

"Neigh trust" -> "Life Satisfaction"

"Psych safety" -> "Depressive symptoms"

"Psych safety" -> "Job satisfaction"

"Psych safety" -> "Life Satisfaction"

"Psych safety" -> Anxiety

"Self-efficacy" -> "Life Satisfaction"

"Self-efficacy" <-> Income

"Self-reported health" -> "Life Satisfaction"

"Sex at birth" -> "Life Satisfaction"

"Sex at birth" -> Income

"Social media" -> "Life Satisfaction"

"Social support" -> "Life Satisfaction"

"Work engage" -> "Life Satisfaction"

"Workplace prep" -> "Life Satisfaction"

"life events" -> "Life Satisfaction"

"life events" -> Income

Anxiety -> "Depressive symptoms"

Anxiety -> "Life Satisfaction"

BMI -> "Life Satisfaction"

BMI -> Sleep

Burnout -> "Life Satisfaction"

Control -> "Life Satisfaction"

Diet -> "Life Satisfaction"

FoC -> "Life Satisfaction"

Income -> "Compassion fatigue"

Income -> "Depressive symptoms"

Income -> "Health S Utilisation"

Income -> "Income concerns"

Income -> "Job satisfaction"

Income -> "Job stress"

Income -> "Neigh trust"

Income -> "Self-reported health"

Income -> "Social media"

Income -> "Social support"

Income -> "Work engage"

Income -> "Workplace prep"

Income -> Alcohol

Income -> Anxiety

Income -> BMI

Income -> Burnout

Income -> Control

Income -> Diet

Income -> Optimism

Income -> PA

Income -> Resilience

Income -> Sleep

Optimism -> "Depressive symptoms"

Optimism -> "Life Satisfaction"

PA -> "Life Satisfaction"

PA -> Sleep

Profession -> "Life Satisfaction"

Profession -> Income

Purpose -> "Life Satisfaction"

Redeployed -> "Life Satisfaction"

Redeployed -> Income

Resilience -> "Life Satisfaction"

Rurality -> "Life Satisfaction"

Rurality -> Income

SOC -> "Life Satisfaction"

SOC -> Income

Shiftwork -> "Life Satisfaction"

Shiftwork -> Income

Sleep -> "Life Satisfaction"

WFH -> "Life Satisfaction"

}

## Concerns about income

dag {

bb="0,0,1,1"

"Age group" [pos="0.127,0.121"]

"Compassion fatigue" [latent,pos="0.631,0.056"]

"Depressive symptoms" [pos="0.296,0.059"]

"Education level" [pos="0.130,0.049"]

"Employment status" [pos="0.078,0.705"]

"Health S Utilisation" [pos="0.768,0.907"]

"Income concerns" [exposure,pos="0.249,0.515"]

"Job satisfaction" [pos="0.462,0.871"]

"Job stress" [pos="0.562,0.922"]

"Life Satisfaction" [outcome,pos="0.671,0.508"]

"Neigh trust" [pos="0.064,0.143"]

"Psych safety" [pos="0.646,0.904"]

"Self-efficacy" [pos="0.908,0.073"]

"Self-reported health" [pos="0.742,0.781"]

"Sex at birth" [pos="0.064,0.592"]

"Social media" [pos="0.049,0.260"]

"Social support" [pos="0.947,0.348"]

"Work engage" [pos="0.311,0.757"]

"Workplace prep" [pos="0.382,0.834"]

"life events" [pos="0.205,0.044"]

Alcohol [pos="0.852,0.856"]

Anxiety [pos="0.464,0.031"]

BMI [pos="0.961,0.749"]

Burnout [pos="0.562,0.039"]

Control [pos="0.960,0.229"]

Diet [pos="0.917,0.914"]

FoC [pos="0.956,0.570"]

Income [pos="0.050,0.356"]

Optimism [pos="0.744,0.021"]

PA [pos="0.963,0.661"]

Profession [pos="0.074,0.823"]

Purpose [pos="0.959,0.466"]

Redeployed [pos="0.257,0.918"]

Resilience [pos="0.824,0.045"]

Rurality [pos="0.048,0.471"]

SOC [pos="0.945,0.147"]

Shiftwork [pos="0.161,0.920"]

Sleep [pos="0.957,0.856"]

WFH [pos="0.091,0.903"]

"Age group" -> "Income concerns"

"Age group" -> "Life Satisfaction"

"Compassion fatigue" -> "Life Satisfaction"

"Depressive symptoms" -> "Life Satisfaction"

"Education level" -> "Income concerns"

"Education level" -> "Life Satisfaction"

"Employment status" -> "Income concerns"

"Employment status" -> "Life Satisfaction"

"Employment status" -> Rurality

"Income concerns" -> "Compassion fatigue"

"Income concerns" -> "Depressive symptoms"

"Income concerns" -> "Health S Utilisation"

"Income concerns" -> "Job satisfaction"

"Income concerns" -> "Job stress"

"Income concerns" -> "Self-reported health"

"Income concerns" -> "Social media"

"Income concerns" -> "Social support"

"Income concerns" -> "Work engage"

"Income concerns" -> "Workplace prep"

"Income concerns" -> Alcohol

"Income concerns" -> Anxiety

"Income concerns" -> BMI

"Income concerns" -> Burnout

"Income concerns" -> Diet

"Income concerns" -> Optimism

"Income concerns" -> PA

"Income concerns" -> Sleep

"Income concerns" <-> "Life Satisfaction"

"Job satisfaction" -> "Life Satisfaction"

"Job stress" -> "Job satisfaction"

"Job stress" -> "Life Satisfaction"

"Job stress" -> Anxiety

"Life Satisfaction" -> "Health S Utilisation"

"Life Satisfaction" -> Alcohol

"Neigh trust" -> "Life Satisfaction"

"Psych safety" -> "Depressive symptoms"

"Psych safety" -> "Job satisfaction"

"Psych safety" -> "Life Satisfaction"

"Psych safety" -> Anxiety

"Self-efficacy" -> "Income concerns"

"Self-efficacy" -> "Life Satisfaction"

"Self-efficacy" -> Resilience

"Self-reported health" -> "Life Satisfaction"

"Sex at birth" -> "Income concerns"

"Sex at birth" -> "Life Satisfaction"

"Social media" -> "Life Satisfaction"

"Social support" -> "Life Satisfaction"

"Work engage" -> "Life Satisfaction"

"Workplace prep" -> "Life Satisfaction"

"life events" -> "Income concerns"

"life events" -> "Life Satisfaction"

Anxiety -> "Depressive symptoms"

Anxiety -> "Life Satisfaction"

BMI -> "Life Satisfaction"

BMI -> Sleep

Burnout -> "Life Satisfaction"

Control -> "Income concerns"

Control -> "Life Satisfaction"

Diet -> "Life Satisfaction"

FoC -> "Life Satisfaction"

Income -> "Income concerns"

Income -> "Life Satisfaction"

Optimism -> "Depressive symptoms"

Optimism -> "Life Satisfaction"

PA -> "Life Satisfaction"

PA -> Sleep

Profession -> "Income concerns"

Profession -> "Life Satisfaction"

Purpose -> "Life Satisfaction"

Redeployed -> "Income concerns"

Redeployed -> "Life Satisfaction"

Resilience -> "Income concerns"

Resilience -> "Life Satisfaction"

Rurality -> "Income concerns"

Rurality -> "Life Satisfaction"

SOC -> "Income concerns"

SOC -> "Life Satisfaction"

Shiftwork -> "Income concerns"

Shiftwork -> "Life Satisfaction"

Sleep -> "Life Satisfaction"

WFH -> "Life Satisfaction"

}

## Marital status

dag {

bb="0,0,1,1"

"Age group" [pos="0.095,0.126"]

"Anxiety symptoms" [pos="0.587,0.041"]

"Depressive symp" [pos="0.379,0.053"]

"Education level" [pos="0.130,0.049"]

"Employment status" [pos="0.058,0.701"]

"Fear COVID" [pos="0.925,0.627"]

"Health service util" [pos="0.878,0.388"]

"Income concerns" [pos="0.049,0.260"]

"Job satisfaction" [pos="0.443,0.917"]

"Job stress" [pos="0.072,0.891"]

"Life events" [pos="0.190,0.036"]

"Marital status" [exposure,pos="0.364,0.421"]

"Psych safety" [pos="0.634,0.918"]

"Self-reported health" [pos="0.788,0.923"]

"Sex at birth" [pos="0.033,0.587"]

"Social support" [pos="0.951,0.461"]

"Work engage" [pos="0.539,0.885"]

"Workplace prep" [pos="0.374,0.827"]

"life satisfaction" [outcome,pos="0.692,0.438"]

Alcohol [pos="0.912,0.730"]

BMI [pos="0.957,0.856"]

Burnout [pos="0.492,0.040"]

Control [pos="0.884,0.239"]

Dependents [pos="0.095,0.200"]

Income [pos="0.044,0.384"]

Optimism [pos="0.690,0.037"]

PA [pos="0.850,0.890"]

Profession [pos="0.052,0.808"]

Purpose [pos="0.965,0.557"]

Redeployed [pos="0.215,0.914"]

Resilience [pos="0.787,0.055"]

Rurality [pos="0.044,0.483"]

SOC [pos="0.872,0.133"]

Shiftwork [pos="0.290,0.876"]

Sleep [pos="0.899,0.881"]

WFH [pos="0.144,0.902"]

"Age group" -> "Marital status"

"Age group" -> "life satisfaction"

"Anxiety symptoms" -> "Marital status"

"Anxiety symptoms" -> "life satisfaction"

"Anxiety symptoms" -> Burnout

"Depressive symp" -> "Marital status"

"Depressive symp" -> "life satisfaction"

"Depressive symp" -> Burnout

"Education level" -> "Marital status"

"Education level" -> "life satisfaction"

"Employment status" -> "Marital status"

"Employment status" -> "life satisfaction"

"Fear COVID" -> "life satisfaction"

"Health service util" -> "life satisfaction"

"Income concerns" -> "Marital status"

"Income concerns" -> "life satisfaction"

"Job satisfaction" -> "Marital status"

"Job satisfaction" -> "life satisfaction"

"Job stress" -> "Marital status"

"Job stress" -> "life satisfaction"

"Life events" -> "Marital status"

"Life events" -> "life satisfaction"

"Marital status" -> "Fear COVID"

"Marital status" -> "Health service util"

"Marital status" -> "Self-reported health"

"Marital status" -> "Social support"

"Marital status" -> "Work engage"

"Marital status" -> "life satisfaction"

"Marital status" -> Control

"Marital status" -> Dependents

"Marital status" -> Income

"Marital status" -> PA

"Marital status" -> Purpose

"Marital status" -> Resilience

"Marital status" -> Sleep

"Marital status" <-> BMI

"Psych safety" -> "life satisfaction"

"Self-reported health" -> "life satisfaction"

"Sex at birth" -> "life satisfaction"

"Social support" -> "life satisfaction"

"Work engage" -> "life satisfaction"

"Workplace prep" -> "life satisfaction"

Alcohol -> "Marital status"

Alcohol -> "life satisfaction"

BMI -> "life satisfaction"

Burnout -> "Marital status"

Burnout -> "life satisfaction"

Control -> "life satisfaction"

Dependents -> "life satisfaction"

Income -> "life satisfaction"

Optimism -> "Marital status"

Optimism -> "life satisfaction"

PA -> "life satisfaction"

Profession -> "Marital status"

Profession -> "life satisfaction"

Purpose -> "life satisfaction"

Redeployed -> "life satisfaction"

Resilience -> "life satisfaction"

Rurality -> "Marital status"

Rurality -> "life satisfaction"

Shiftwork -> "life satisfaction"

Sleep -> "life satisfaction"

WFH -> "life satisfaction"

}

## Education

dag {

bb="0,0,1,1"

"Age group" [pos="0.095,0.126"]

"Anxiety symptoms" [pos="0.587,0.041"]

"Depressive symp" [pos="0.379,0.053"]

"Direct COVID care" [pos="0.695,0.836"]

"Education level" [pos="0.130,0.049"]

"Employment status" [pos="0.058,0.701"]

"Fear COVID" [pos="0.925,0.627"]

"Health service util" [pos="0.889,0.530"]

"Income concerns" [pos="0.049,0.260"]

"Job satisfaction" [pos="0.443,0.917"]

"Job stress" [pos="0.072,0.891"]

"Life events" [pos="0.190,0.036"]

"Life satisfaction" [outcome,pos="0.570,0.484"]

"Marital status" [pos="0.081,0.198"]

"Psych safety" [pos="0.629,0.883"]

"Self-reported health" [pos="0.788,0.923"]

"Sex at birth" [pos="0.033,0.587"]

"Social support" [pos="0.942,0.433"]

"Work engage" [pos="0.539,0.885"]

"Workplace prep" [pos="0.374,0.827"]

"Yrs in Profession" [pos="0.137,0.811"]

Alcohol [pos="0.912,0.730"]

BMI [pos="0.957,0.856"]

Burnout [pos="0.492,0.040"]

Control [pos="0.884,0.239"]

Dependents [pos="0.267,0.054"]

Education [exposure,pos="0.298,0.494"]

Income [pos="0.044,0.384"]

Optimism [pos="0.690,0.037"]

PA [pos="0.850,0.890"]

Profession [pos="0.052,0.808"]

Purpose [pos="0.907,0.351"]

Redeployed [pos="0.215,0.914"]

Resilience [pos="0.787,0.055"]

Rurality [pos="0.037,0.459"]

SOC [pos="0.872,0.133"]

Shiftwork [pos="0.290,0.876"]

Sleep [pos="0.899,0.881"]

WFH [pos="0.144,0.902"]

"Age group" -> "Life satisfaction"

"Age group" -> Education

"Anxiety symptoms" -> "Life satisfaction"

"Depressive symp" -> "Life satisfaction"

"Direct COVID care" -> "Life satisfaction"

"Employment status" -> "Life satisfaction"

"Employment status" <-> Education

"Fear COVID" -> "Life satisfaction"

"Health service util" -> "Life satisfaction"

"Income concerns" -> "Life satisfaction"

"Job satisfaction" -> "Life satisfaction"

"Job stress" -> "Life satisfaction"

"Life events" -> "Life satisfaction"

"Life satisfaction" <-> Education

"Marital status" -> "Life satisfaction"

"Psych safety" -> "Life satisfaction"

"Self-reported health" -> "Life satisfaction"

"Sex at birth" -> "Life satisfaction"

"Sex at birth" -> Education

"Social support" -> "Life satisfaction"

"Social support" -> Education

"Work engage" -> "Life satisfaction"

"Workplace prep" -> "Life satisfaction"

Alcohol -> "Life satisfaction"

BMI -> "Life satisfaction"

Control -> "Life satisfaction"

Dependents -> "Life satisfaction"

Education -> "Anxiety symptoms"

Education -> "Depressive symp"

Education -> "Direct COVID care"

Education -> "Fear COVID"

Education -> "Health service util"

Education -> "Income concerns"

Education -> "Job satisfaction"

Education -> "Job stress"

Education -> "Life events"

Education -> "Marital status"

Education -> "Psych safety"

Education -> "Self-reported health"

Education -> "Work engage"

Education -> "Workplace prep"

Education -> Alcohol

Education -> BMI

Education -> Control

Education -> Dependents

Education -> Income

Education -> Optimism

Education -> PA

Education -> Profession

Education -> Purpose

Education -> Redeployed

Education -> Resilience

Education -> Sleep

Education -> WFH

Income -> "Life satisfaction"

Optimism -> "Life satisfaction"

PA -> "Life satisfaction"

Profession -> "Life satisfaction"

Purpose -> "Life satisfaction"

Redeployed -> "Life satisfaction"

Resilience -> "Life satisfaction"

Rurality -> "Life satisfaction"

Rurality -> Education

Sleep -> "Life satisfaction"

WFH -> "Life satisfaction"

}

## Dependents

dag {

bb="0,0,1,1"

"Age group" [pos="0.095,0.126"]

"Anxiety symptoms" [pos="0.587,0.041"]

"Depressive symp" [pos="0.379,0.053"]

"Direct COVID care" [pos="0.682,0.810"]

"Education level" [pos="0.130,0.049"]

"Employment status" [pos="0.058,0.701"]

"Fear COVID" [pos="0.925,0.627"]

"Health service util" [pos="0.878,0.388"]

"Income concerns" [pos="0.049,0.260"]

"Job satisfaction" [pos="0.443,0.917"]

"Job stress" [pos="0.072,0.891"]

"Life Satisfaction" [outcome,pos="0.588,0.425"]

"Life events" [pos="0.246,0.037"]

"Marital status" [pos="0.054,0.190"]

"Psych safety" [pos="0.634,0.918"]

"Self-reported health" [pos="0.788,0.923"]

"Sex at birth" [pos="0.033,0.587"]

"Social support" [pos="0.951,0.461"]

"Work engage" [pos="0.539,0.885"]

"Workplace prep" [pos="0.374,0.827"]

"Yrs in Profession" [pos="0.136,0.814"]

Alcohol [pos="0.912,0.730"]

BMI [pos="0.957,0.856"]

Burnout [pos="0.492,0.040"]

Control [pos="0.884,0.239"]

Dependents [exposure,pos="0.260,0.416"]

Income [pos="0.044,0.384"]

Optimism [pos="0.690,0.037"]

PA [pos="0.850,0.890"]

Profession [pos="0.052,0.808"]

Purpose [pos="0.965,0.557"]

Redeployed [pos="0.228,0.888"]

Resilience [pos="0.787,0.055"]

Rurality [pos="0.044,0.483"]

SOC [pos="0.872,0.133"]

Shiftwork [pos="0.290,0.876"]

Sleep [pos="0.899,0.881"]

WFH [pos="0.144,0.902"]

"Age group" -> "Life Satisfaction"

"Age group" -> Dependents

"Anxiety symptoms" -> "Life Satisfaction"

"Anxiety symptoms" <-> Dependents

"Depressive symp" -> "Life Satisfaction"

"Depressive symp" <-> Dependents

"Direct COVID care" -> "Life Satisfaction"

"Education level" -> "Life Satisfaction"

"Education level" -> Dependents

"Employment status" -> "Life Satisfaction"

"Employment status" -> Dependents

"Fear COVID" -> "Life Satisfaction"

"Health service util" -> "Life Satisfaction"

"Income concerns" -> "Life Satisfaction"

"Income concerns" <-> Dependents

"Job satisfaction" -> "Life Satisfaction"

"Job stress" -> "Life Satisfaction"

"Life events" -> "Life Satisfaction"

"Life events" -> Dependents

"Marital status" -> "Life Satisfaction"

"Marital status" -> Dependents

"Psych safety" -> "Life Satisfaction"

"Self-reported health" -> "Life Satisfaction"

"Self-reported health" -> Dependents

"Sex at birth" -> "Life Satisfaction"

"Sex at birth" -> Dependents

"Social support" -> "Life Satisfaction"

"Social support" -> Dependents

"Work engage" -> "Life Satisfaction"

"Workplace prep" -> "Life Satisfaction"

"Yrs in Profession" -> "Life Satisfaction"

"Yrs in Profession" -> Dependents

Alcohol -> "Life Satisfaction"

Alcohol <-> Dependents

BMI -> "Life Satisfaction"

BMI -> Dependents

Control -> "Life Satisfaction"

Control -> Dependents

Dependents -> "Fear COVID"

Dependents -> "Health service util"

Dependents -> "Job stress"

Dependents -> "Life Satisfaction"

Dependents -> "Work engage"

Dependents -> Purpose

Dependents -> Redeployed

Dependents -> Sleep

Dependents -> WFH

Dependents <-> Resilience

Income -> "Life Satisfaction"

Income -> Dependents

Optimism -> "Life Satisfaction"

Optimism -> Dependents

PA -> "Life Satisfaction"

PA -> Dependents

Profession -> "Life Satisfaction"

Profession -> Dependents

Purpose -> "Life Satisfaction"

Redeployed -> "Life Satisfaction"

Resilience -> "Life Satisfaction"

Rurality -> "Life Satisfaction"

Rurality -> Dependents

Sleep -> "Life Satisfaction"

WFH -> "Life Satisfaction"

}

## Social media

dag {

bb="0,0,1,1"

"Age group" [pos="0.127,0.121"]

"Compassion fatigue" [latent,pos="0.631,0.056"]

"Depressive symptoms" [pos="0.296,0.059"]

"Education level" [pos="0.130,0.049"]

"Employment status" [pos="0.055,0.725"]

"Health S Utilisation" [pos="0.705,0.940"]

"Income concerns" [pos="0.049,0.260"]

"Job satisfaction" [pos="0.474,0.922"]

"Job stress" [pos="0.562,0.922"]

"Life Satisfaction" [outcome,pos="0.671,0.508"]

"Neigh trust" [pos="0.064,0.143"]

"Psych safety" [pos="0.634,0.918"]

"Self-efficacy" [pos="0.908,0.073"]

"Self-reported health" [pos="0.776,0.952"]

"Sex at birth" [pos="0.034,0.603"]

"Social media" [exposure,pos="0.249,0.515"]

"Social support" [pos="0.947,0.348"]

"Work engage" [pos="0.306,0.935"]

"Workplace prep" [pos="0.391,0.930"]

"life events" [pos="0.205,0.044"]

Alcohol [pos="0.863,0.955"]

Anxiety [pos="0.464,0.031"]

BMI [pos="0.961,0.749"]

Burnout [pos="0.562,0.039"]

Control [pos="0.960,0.229"]

Diet [pos="0.927,0.935"]

FoC [pos="0.956,0.570"]

Income [pos="0.050,0.356"]

Optimism [pos="0.744,0.021"]

PA [pos="0.963,0.661"]

Profession [pos="0.074,0.823"]

Purpose [pos="0.959,0.466"]

Redeployed [pos="0.219,0.934"]

Resilience [pos="0.824,0.045"]

Rurality [pos="0.048,0.471"]

SOC [pos="0.945,0.147"]

Shiftwork [pos="0.161,0.920"]

Sleep [pos="0.957,0.856"]

WFH [pos="0.091,0.903"]

"Age group" -> "Life Satisfaction"

"Age group" -> "Social media"

"Compassion fatigue" -> "Life Satisfaction"

"Depressive symptoms" -> "Life Satisfaction"

"Education level" -> "Life Satisfaction"

"Education level" -> "Social media"

"Employment status" -> "Life Satisfaction"

"Employment status" -> "Social media"

"Income concerns" -> "Life Satisfaction"

"Income concerns" -> "Social media"

"Job satisfaction" -> "Life Satisfaction"

"Job satisfaction" -> "Social media"

"Job stress" -> "Job satisfaction"

"Job stress" -> "Life Satisfaction"

"Job stress" -> "Social media"

"Job stress" -> Anxiety

"Life Satisfaction" -> "Health S Utilisation"

"Life Satisfaction" -> Alcohol

"Life Satisfaction" <-> "Social media"

"Neigh trust" -> "Life Satisfaction"

"Psych safety" -> "Depressive symptoms"

"Psych safety" -> "Life Satisfaction"

"Psych safety" -> Anxiety

"Self-efficacy" -> "Life Satisfaction"

"Self-efficacy" -> "Social media"

"Self-efficacy" -> Resilience

"Self-reported health" -> "Life Satisfaction"

"Sex at birth" -> "Life Satisfaction"

"Sex at birth" -> "Social media"

"Social media" -> "Compassion fatigue"

"Social media" -> "Depressive symptoms"

"Social media" -> "Health S Utilisation"

"Social media" -> "Neigh trust"

"Social media" -> "Psych safety"

"Social media" -> "Self-reported health"

"Social media" -> "Work engage"

"Social media" -> Alcohol

"Social media" -> Anxiety

"Social media" -> BMI

"Social media" -> Burnout

"Social media" -> Diet

"Social media" -> FoC

"Social media" -> Optimism

"Social media" -> PA

"Social media" -> Sleep

"Social support" -> "Life Satisfaction"

"Social support" -> "Social media"

"Work engage" -> "Life Satisfaction"

"Workplace prep" -> "Life Satisfaction"

"life events" -> "Depressive symptoms"

"life events" -> "Life Satisfaction"

"life events" -> "Social media"

"life events" -> Anxiety

Anxiety -> "Depressive symptoms"

Anxiety -> "Life Satisfaction"

BMI -> "Life Satisfaction"

BMI -> Sleep

Burnout -> "Life Satisfaction"

Control -> "Life Satisfaction"

Control -> "Social media"

Diet -> "Life Satisfaction"

FoC -> "Life Satisfaction"

Income -> "Life Satisfaction"

Income -> "Social media"

Optimism -> "Depressive symptoms"

Optimism -> "Life Satisfaction"

PA -> "Life Satisfaction"

PA -> Sleep

Profession -> "Life Satisfaction"

Profession -> "Social media"

Purpose -> "Life Satisfaction"

Redeployed -> "Life Satisfaction"

Resilience -> "Life Satisfaction"

Resilience -> "Social media"

Rurality -> "Life Satisfaction"

Rurality -> "Social media"

SOC -> "Life Satisfaction"

SOC -> "Social media"

Shiftwork -> "Life Satisfaction"

Sleep -> "Life Satisfaction"

WFH -> "Life Satisfaction"

}

## Neighbourhood trust

dag {

bb="0,0,1,1"

"Age group" [pos="0.127,0.121"]

"Compassion fatigue" [latent,pos="0.631,0.056"]

"Depressive symptoms" [pos="0.339,0.052"]

"Education level" [pos="0.158,0.044"]

"Employment status" [pos="0.055,0.725"]

"Health S Utilisation" [pos="0.705,0.940"]

"Income concerns" [pos="0.049,0.260"]

"Job satisfaction" [pos="0.474,0.922"]

"Job stress" [pos="0.562,0.922"]

"Life Satisfaction" [outcome,pos="0.671,0.508"]

"Neighborhood trust" [exposure,pos="0.249,0.515"]

"Psych safety" [pos="0.634,0.918"]

"Self-efficacy" [pos="0.908,0.073"]

"Self-reported health" [pos="0.776,0.952"]

"Sex at birth" [pos="0.034,0.603"]

"Social media" [pos="0.054,0.169"]

"Social support" [pos="0.947,0.348"]

"Work engage" [pos="0.306,0.935"]

"Workplace prep" [pos="0.391,0.930"]

"life events" [pos="0.232,0.037"]

Alcohol [pos="0.863,0.955"]

Anxiety [pos="0.464,0.031"]

BMI [pos="0.961,0.749"]

Burnout [pos="0.562,0.039"]

Control [pos="0.960,0.229"]

Diet [pos="0.927,0.935"]

FoC [pos="0.956,0.570"]

Income [pos="0.050,0.356"]

Optimism [pos="0.744,0.021"]

PA [pos="0.963,0.661"]

Profession [pos="0.074,0.823"]

Purpose [pos="0.959,0.466"]

Redeployed [pos="0.219,0.934"]

Resilience [pos="0.824,0.045"]

Rurality [pos="0.048,0.471"]

SOC [pos="0.945,0.147"]

Shiftwork [pos="0.161,0.920"]

Sleep [pos="0.957,0.856"]

WFH [pos="0.091,0.903"]

"Age group" -> "Life Satisfaction"

"Age group" -> "Neighborhood trust"

"Compassion fatigue" -> "Life Satisfaction"

"Depressive symptoms" -> "Life Satisfaction"

"Education level" -> "Life Satisfaction"

"Education level" -> "Neighborhood trust"

"Employment status" -> "Life Satisfaction"

"Employment status" -> "Neighborhood trust"

"Employment status" -> Rurality

"Income concerns" -> "Life Satisfaction"

"Income concerns" -> "Neighborhood trust"

"Job satisfaction" -> "Life Satisfaction"

"Job stress" -> "Job satisfaction"

"Job stress" -> "Life Satisfaction"

"Job stress" -> Anxiety

"Life Satisfaction" -> "Health S Utilisation"

"Life Satisfaction" -> Alcohol

"Life Satisfaction" <-> "Neighborhood trust"

"Neighborhood trust" -> "Depressive symptoms"

"Neighborhood trust" -> "Health S Utilisation"

"Neighborhood trust" -> "Self-reported health"

"Neighborhood trust" -> "Social support"

"Neighborhood trust" -> Alcohol

"Neighborhood trust" -> Anxiety

"Neighborhood trust" -> BMI

"Neighborhood trust" -> Diet

"Neighborhood trust" -> FoC

"Neighborhood trust" -> PA

"Neighborhood trust" -> SOC

"Neighborhood trust" -> Sleep

"Psych safety" -> "Depressive symptoms"

"Psych safety" -> "Job satisfaction"

"Psych safety" -> "Life Satisfaction"

"Psych safety" -> Anxiety

"Self-efficacy" -> "Life Satisfaction"

"Self-efficacy" -> "Neighborhood trust"

"Self-efficacy" -> Resilience

"Self-reported health" -> "Life Satisfaction"

"Sex at birth" -> "Life Satisfaction"

"Sex at birth" -> "Neighborhood trust"

"Social media" -> "Life Satisfaction"

"Social media" -> "Neighborhood trust"

"Social support" -> "Life Satisfaction"

"Work engage" -> "Life Satisfaction"

"Workplace prep" -> "Life Satisfaction"

"life events" -> "Life Satisfaction"

"life events" -> "Neighborhood trust"

Anxiety -> "Depressive symptoms"

Anxiety -> "Life Satisfaction"

BMI -> "Life Satisfaction"

BMI -> Sleep

Burnout -> "Life Satisfaction"

Control -> "Life Satisfaction"

Diet -> "Life Satisfaction"

FoC -> "Life Satisfaction"

Income -> "Life Satisfaction"

Income -> "Neighborhood trust"

Optimism -> "Depressive symptoms"

Optimism -> "Life Satisfaction"

Optimism -> "Neighborhood trust"

PA -> "Life Satisfaction"

PA -> Sleep

Profession -> "Life Satisfaction"

Purpose -> "Life Satisfaction"

Redeployed -> "Life Satisfaction"

Resilience -> "Life Satisfaction"

Resilience -> "Neighborhood trust"

Rurality -> "Life Satisfaction"

Rurality -> "Neighborhood trust"

SOC -> "Life Satisfaction"

Shiftwork -> "Life Satisfaction"

Sleep -> "Life Satisfaction"

WFH -> "Life Satisfaction"

}

## Recent life events

dag {

bb="0,0,1,1"

"Age group" [pos="0.127,0.121"]

"Compassion fatigue" [latent,pos="0.631,0.056"]

"Education level" [pos="0.209,0.056"]

"Employment status" [pos="0.055,0.725"]

"Health S Utilisation" [pos="0.705,0.940"]

"Income concerns" [pos="0.049,0.260"]

"Job satisfaction" [pos="0.474,0.922"]

"Job stress" [pos="0.562,0.922"]

"Life Satisfaction" [outcome,pos="0.671,0.508"]

"Neigh trust" [pos="0.296,0.059"]

"Psych safety" [pos="0.634,0.918"]

"Recent life events" [exposure,pos="0.249,0.515"]

"Self-efficacy" [pos="0.908,0.073"]

"Self-reported health" [pos="0.776,0.952"]

"Sex at birth" [pos="0.034,0.603"]

"Social media" [pos="0.064,0.143"]

"Social support" [pos="0.947,0.348"]

"Work engage" [pos="0.306,0.935"]

"Workplace prep" [pos="0.391,0.930"]

Alcohol [pos="0.863,0.955"]

Anxiety [pos="0.464,0.031"]

BMI [pos="0.961,0.749"]

Burnout [pos="0.562,0.039"]

Control [pos="0.960,0.229"]

Diet [pos="0.927,0.935"]

FoC [pos="0.956,0.570"]

Income [pos="0.050,0.356"]

Optimism [pos="0.744,0.021"]

PA [pos="0.963,0.661"]

Profession [pos="0.074,0.823"]

Purpose [pos="0.959,0.466"]

Redeployed [pos="0.219,0.934"]

Resilience [pos="0.824,0.045"]

Rurality [pos="0.048,0.471"]

SOC [pos="0.945,0.147"]

Shiftwork [pos="0.161,0.920"]

Sleep [pos="0.957,0.856"]

WFH [pos="0.091,0.903"]

"Age group" -> "Life Satisfaction"

"Age group" -> "Recent life events"

"Compassion fatigue" -> "Life Satisfaction"

"Education level" -> "Life Satisfaction"

"Education level" -> "Recent life events"

"Employment status" -> "Life Satisfaction"

"Employment status" -> "Recent life events"

"Employment status" -> Rurality

"Income concerns" -> "Life Satisfaction"

"Income concerns" <-> "Recent life events"

"Job satisfaction" -> "Life Satisfaction"

"Job stress" -> "Job satisfaction"

"Job stress" -> "Life Satisfaction"

"Job stress" -> Anxiety

"Life Satisfaction" -> "Health S Utilisation"

"Life Satisfaction" -> Alcohol

"Life Satisfaction" <-> "Recent life events"

"Neigh trust" -> "Life Satisfaction"

"Psych safety" -> "Job satisfaction"

"Psych safety" -> "Life Satisfaction"

"Psych safety" -> Anxiety

"Recent life events" -> "Compassion fatigue"

"Recent life events" -> "Health S Utilisation"

"Recent life events" -> "Job satisfaction"

"Recent life events" -> "Job stress"

"Recent life events" -> "Neigh trust"

"Recent life events" -> "Psych safety"

"Recent life events" -> "Self-reported health"

"Recent life events" -> "Work engage"

"Recent life events" -> "Workplace prep"

"Recent life events" -> Alcohol

"Recent life events" -> Anxiety

"Recent life events" -> BMI

"Recent life events" -> Burnout

"Recent life events" -> Control

"Recent life events" -> Diet

"Recent life events" -> FoC

"Recent life events" -> Optimism

"Recent life events" -> PA

"Recent life events" -> Redeployed

"Recent life events" -> Resilience

"Recent life events" -> SOC

"Recent life events" -> Shiftwork

"Recent life events" -> Sleep

"Recent life events" -> WFH

"Recent life events" <-> "Self-efficacy"

"Recent life events" <-> "Social media"

"Recent life events" <-> "Social support"

"Self-efficacy" -> "Life Satisfaction"

"Self-efficacy" -> Resilience

"Self-reported health" -> "Life Satisfaction"

"Sex at birth" -> "Life Satisfaction"

"Sex at birth" -> "Recent life events"

"Social media" -> "Life Satisfaction"

"Social support" -> "Life Satisfaction"

"Work engage" -> "Life Satisfaction"

"Workplace prep" -> "Life Satisfaction"

Anxiety -> "Life Satisfaction"

Anxiety -> "Neigh trust"

BMI -> "Life Satisfaction"

BMI -> Sleep

Burnout -> "Life Satisfaction"

Control -> "Life Satisfaction"

Diet -> "Life Satisfaction"

FoC -> "Life Satisfaction"

Income -> "Life Satisfaction"

Income -> "Recent life events"

Optimism -> "Life Satisfaction"

Optimism -> "Neigh trust"

PA -> "Life Satisfaction"

PA -> Sleep

Profession -> "Life Satisfaction"

Profession -> "Recent life events"

Purpose -> "Life Satisfaction"

Purpose -> "Recent life events"

Redeployed -> "Life Satisfaction"

Resilience -> "Life Satisfaction"

Rurality -> "Life Satisfaction"

Rurality -> "Recent life events"

SOC -> "Life Satisfaction"

Shiftwork -> "Life Satisfaction"

Sleep -> "Life Satisfaction"

WFH -> "Life Satisfaction"

}

# Occupational factors

## Employment status

dag {

bb="0,0,1,1"

"Age group" [pos="0.044,0.343"]

"Compassion fatigue" [latent,pos="0.852,0.465"]

"Depressive symptoms" [pos="0.726,0.039"]

"Education level" [pos="0.295,0.038"]

"Employment status" [exposure,pos="0.225,0.493"]

"Health S Utilisation" [pos="0.901,0.204"]

"Income concerns" [pos="0.207,0.110"]

"Job satisfaction" [pos="0.912,0.069"]

"Job stress" [pos="0.973,0.353"]

"Life Satisfaction" [outcome,pos="0.671,0.508"]

"Neigh trust" [pos="0.226,0.035"]

"Psych safety" [pos="0.959,0.454"]

"Self-efficacy" [pos="0.391,0.040"]

"Self-reported health" [pos="0.121,0.933"]

"Sex at birth" [pos="0.029,0.238"]

"Social media" [pos="0.069,0.153"]

"Social support" [pos="0.872,0.778"]

"Work engage" [pos="0.370,0.934"]

"Workplace prep" [pos="0.486,0.932"]

"life events" [pos="0.209,0.937"]

Alcohol [pos="0.648,0.945"]

Anxiety [pos="0.588,0.046"]

BMI [pos="0.880,0.938"]

Burnout [pos="0.832,0.031"]

Control [pos="0.973,0.895"]

FoC [pos="0.956,0.768"]

Income [pos="0.101,0.074"]

Optimism [pos="0.912,0.565"]

PA [pos="0.563,0.927"]

Profession [pos="0.038,0.636"]

Purpose [pos="0.496,0.048"]

Redeployed [pos="0.065,0.861"]

Resilience [pos="0.964,0.663"]

Rurality [pos="0.045,0.455"]

SOC [pos="0.912,0.682"]

Shiftwork [pos="0.050,0.774"]

Sleep [pos="0.802,0.924"]

Smoking [pos="0.739,0.927"]

WFH [pos="0.286,0.934"]

"Age group" -> "Employment status"

"Age group" -> "Life Satisfaction"

"Compassion fatigue" -> "Life Satisfaction"

"Depressive symptoms" -> "Life Satisfaction"

"Education level" -> "Employment status"

"Education level" -> "Life Satisfaction"

"Education level" -> Income

"Employment status" -> "Compassion fatigue"

"Employment status" -> "Depressive symptoms"

"Employment status" -> "Health S Utilisation"

"Employment status" -> "Income concerns"

"Employment status" -> "Job satisfaction"

"Employment status" -> "Job stress"

"Employment status" -> "Life Satisfaction"

"Employment status" -> "Neigh trust"

"Employment status" -> "Psych safety"

"Employment status" -> "Social media"

"Employment status" -> "Work engage"

"Employment status" -> "Workplace prep"

"Employment status" -> Alcohol

"Employment status" -> Anxiety

"Employment status" -> BMI

"Employment status" -> Burnout

"Employment status" -> Control

"Employment status" -> FoC

"Employment status" -> Income

"Employment status" -> Optimism

"Employment status" -> PA

"Employment status" -> Shiftwork

"Employment status" -> Sleep

"Employment status" -> Smoking

"Employment status" -> WFH

"Income concerns" -> "Life Satisfaction"

"Job satisfaction" -> "Life Satisfaction"

"Job stress" -> "Job satisfaction"

"Job stress" -> "Life Satisfaction"

"Job stress" -> Anxiety

"Life Satisfaction" -> "Health S Utilisation"

"Life Satisfaction" -> Alcohol

"Life Satisfaction" -> Smoking

"Neigh trust" -> "Life Satisfaction"

"Psych safety" -> "Depressive symptoms"

"Psych safety" -> "Job satisfaction"

"Psych safety" -> "Life Satisfaction"

"Psych safety" -> Anxiety

"Self-efficacy" -> "Employment status"

"Self-efficacy" -> "Life Satisfaction"

"Self-efficacy" -> Resilience

"Self-reported health" -> "Employment status"

"Self-reported health" -> "Life Satisfaction"

"Sex at birth" -> "Employment status"

"Sex at birth" -> "Life Satisfaction"

"Social media" -> "Life Satisfaction"

"Social support" -> "Employment status"

"Social support" -> "Life Satisfaction"

"Work engage" -> "Life Satisfaction"

"Workplace prep" -> "Life Satisfaction"

"life events" -> "Employment status"

"life events" -> "Life Satisfaction"

Alcohol -> Smoking

Anxiety -> "Depressive symptoms"

Anxiety -> "Life Satisfaction"

BMI -> "Life Satisfaction"

BMI -> Sleep

Burnout -> "Life Satisfaction"

Control -> "Life Satisfaction"

FoC -> "Life Satisfaction"

Income -> "Income concerns"

Income -> "Life Satisfaction"

Optimism -> "Depressive symptoms"

Optimism -> "Life Satisfaction"

PA -> "Life Satisfaction"

PA -> Sleep

Profession -> "Employment status"

Profession -> "Life Satisfaction"

Purpose -> "Employment status"

Purpose -> "Life Satisfaction"

Redeployed -> "Life Satisfaction"

Resilience -> "Employment status"

Resilience -> "Life Satisfaction"

Rurality -> "Employment status"

Rurality -> "Life Satisfaction"

SOC -> "Employment status"

SOC -> "Life Satisfaction"

Shiftwork -> "Life Satisfaction"

Sleep -> "Life Satisfaction"

WFH -> "Life Satisfaction"

}

## Profession

dag {

bb="0,0,1,1"

"Age group" [pos="0.047,0.326"]

"Compassion fatigue" [latent,pos="0.933,0.164"]

"Depressive symptoms" [pos="0.773,0.050"]

"Education level" [pos="0.211,0.036"]

"Employment status" [pos="0.057,0.567"]

"Health S Utilisation" [pos="0.890,0.937"]

"Income concerns" [pos="0.211,0.170"]

"Job satisfaction" [pos="0.374,0.936"]

"Job stress" [pos="0.442,0.918"]

"Life Satisfaction" [outcome,pos="0.671,0.508"]

"Neigh trust" [pos="0.366,0.046"]

"Psych safety" [pos="0.521,0.925"]

"Self-efficacy" [pos="0.433,0.087"]

"Self-reported health" [pos="0.605,0.949"]

"Sex at birth" [pos="0.041,0.233"]

"Social media" [pos="0.295,0.022"]

"Social support" [pos="0.961,0.554"]

"Work engage" [pos="0.191,0.907"]

"Workplace prep" [pos="0.285,0.930"]

"life events" [pos="0.471,0.032"]

Alcohol [pos="0.727,0.918"]

Anxiety [pos="0.658,0.040"]

BMI [pos="0.977,0.828"]

Burnout [pos="0.874,0.087"]

Control [pos="0.972,0.733"]

FoC [pos="0.972,0.643"]

Income [pos="0.044,0.102"]

Optimism [pos="0.966,0.414"]

PA [pos="0.664,0.918"]

Profession [exposure,pos="0.261,0.501"]

Purpose [pos="0.559,0.038"]

Redeployed [pos="0.046,0.840"]

Resilience [pos="0.936,0.248"]

Rurality [pos="0.031,0.433"]

SOC [pos="0.948,0.337"]

Shiftwork [pos="0.045,0.726"]

Sleep [pos="0.963,0.890"]

Smoking [pos="0.791,0.908"]

WFH [pos="0.114,0.879"]

"Age group" -> "Life Satisfaction"

"Age group" -> Profession

"Compassion fatigue" -> "Life Satisfaction"

"Depressive symptoms" -> "Life Satisfaction"

"Education level" -> "Life Satisfaction"

"Education level" -> Income

"Education level" -> Profession

"Employment status" -> "Life Satisfaction"

"Employment status" -> Income

"Income concerns" -> "Life Satisfaction"

"Job satisfaction" -> "Life Satisfaction"

"Job stress" -> "Job satisfaction"

"Job stress" -> "Life Satisfaction"

"Job stress" -> Anxiety

"Life Satisfaction" -> "Health S Utilisation"

"Life Satisfaction" -> Alcohol

"Life Satisfaction" -> Smoking

"Neigh trust" -> "Life Satisfaction"

"Psych safety" -> "Depressive symptoms"

"Psych safety" -> "Job satisfaction"

"Psych safety" -> "Life Satisfaction"

"Psych safety" -> Anxiety

"Psych safety" -> Burnout

"Self-efficacy" -> "Life Satisfaction"

"Self-efficacy" -> Profession

"Self-efficacy" -> Resilience

"Self-reported health" -> "Life Satisfaction"

"Sex at birth" -> "Life Satisfaction"

"Sex at birth" -> Profession

"Social media" -> "Life Satisfaction"

"Social support" -> "Life Satisfaction"

"Work engage" -> "Life Satisfaction"

"Workplace prep" -> "Life Satisfaction"

"life events" -> "Life Satisfaction"

Alcohol -> Smoking

Anxiety -> "Depressive symptoms"

Anxiety -> "Life Satisfaction"

BMI -> "Life Satisfaction"

BMI -> Sleep

Burnout -> "Life Satisfaction"

Control -> "Life Satisfaction"

FoC -> "Life Satisfaction"

Income -> "Income concerns"

Income -> "Life Satisfaction"

Optimism -> "Life Satisfaction"

PA -> "Life Satisfaction"

PA -> Sleep

Profession -> "Compassion fatigue"

Profession -> "Depressive symptoms"

Profession -> "Employment status"

Profession -> "Health S Utilisation"

Profession -> "Income concerns"

Profession -> "Job satisfaction"

Profession -> "Job stress"

Profession -> "Life Satisfaction"

Profession -> "Neigh trust"

Profession -> "Psych safety"

Profession -> "Self-reported health"

Profession -> "Social media"

Profession -> "Social support"

Profession -> "Work engage"

Profession -> "Workplace prep"

Profession -> Alcohol

Profession -> Anxiety

Profession -> BMI

Profession -> Burnout

Profession -> Control

Profession -> FoC

Profession -> Income

Profession -> Optimism

Profession -> PA

Profession -> Redeployed

Profession -> Rurality

Profession -> Shiftwork

Profession -> Sleep

Profession -> Smoking

Profession -> WFH

Purpose -> "Life Satisfaction"

Purpose -> Profession

Redeployed -> "Life Satisfaction"

Resilience -> "Life Satisfaction"

Resilience -> Profession

Rurality -> "Life Satisfaction"

SOC -> "Life Satisfaction"

SOC -> Profession

Shiftwork -> "Life Satisfaction"

Sleep -> "Life Satisfaction"

WFH -> "Life Satisfaction"

}

## Years in Profession

dag {

bb="0,0,1,1"

"Age group" [pos="0.095,0.126"]

"Anxiety symptoms" [pos="0.587,0.041"]

"Depressive symp" [pos="0.379,0.053"]

"Direct COVID care" [pos="0.682,0.810"]

"Education level" [pos="0.130,0.049"]

"Employment status" [pos="0.058,0.701"]

"Fear COVID" [pos="0.925,0.627"]

"Health service util" [pos="0.878,0.388"]

"Income concerns" [pos="0.049,0.260"]

"Job satisfaction" [pos="0.443,0.917"]

"Job stress" [pos="0.072,0.891"]

"Life Satisfaction" [outcome,pos="0.572,0.422"]

"Life events" [pos="0.246,0.037"]

"Marital status" [pos="0.054,0.190"]

"Psych safety" [pos="0.634,0.918"]

"Self-reported health" [pos="0.788,0.923"]

"Sex at birth" [pos="0.033,0.587"]

"Social support" [pos="0.951,0.461"]

"Work engage" [pos="0.539,0.885"]

"Workplace prep" [pos="0.374,0.827"]

"Yrs in Profession" [exposure,pos="0.260,0.416"]

Alcohol [pos="0.912,0.730"]

BMI [pos="0.957,0.856"]

Burnout [pos="0.492,0.040"]

Control [pos="0.884,0.239"]

Income [pos="0.044,0.384"]

Optimism [pos="0.690,0.037"]

PA [pos="0.850,0.890"]

Profession [pos="0.052,0.808"]

Purpose [pos="0.965,0.557"]

Redeployed [pos="0.228,0.888"]

Resilience [pos="0.787,0.055"]

Rurality [pos="0.044,0.483"]

SOC [pos="0.872,0.133"]

Shiftwork [pos="0.290,0.876"]

Sleep [pos="0.899,0.881"]

WFH [pos="0.144,0.902"]

"Age group" -> "Life Satisfaction"

"Age group" -> "Yrs in Profession"

"Anxiety symptoms" -> "Life Satisfaction"

"Depressive symp" -> "Life Satisfaction"

"Direct COVID care" -> "Life Satisfaction"

"Education level" -> "Life Satisfaction"

"Education level" -> "Yrs in Profession"

"Employment status" -> "Life Satisfaction"

"Employment status" -> "Yrs in Profession"

"Fear COVID" -> "Life Satisfaction"

"Health service util" -> "Life Satisfaction"

"Income concerns" -> "Life Satisfaction"

"Job satisfaction" -> "Life Satisfaction"

"Job stress" -> "Life Satisfaction"

"Life events" -> "Life Satisfaction"

"Life events" -> "Yrs in Profession"

"Marital status" -> "Life Satisfaction"

"Marital status" -> "Yrs in Profession"

"Psych safety" -> "Life Satisfaction"

"Self-reported health" -> "Life Satisfaction"

"Sex at birth" -> "Life Satisfaction"

"Sex at birth" -> "Yrs in Profession"

"Social support" -> "Life Satisfaction"

"Work engage" -> "Life Satisfaction"

"Workplace prep" -> "Life Satisfaction"

"Yrs in Profession" -> "Anxiety symptoms"

"Yrs in Profession" -> "Depressive symp"

"Yrs in Profession" -> "Direct COVID care"

"Yrs in Profession" -> "Fear COVID"

"Yrs in Profession" -> "Health service util"

"Yrs in Profession" -> "Income concerns"

"Yrs in Profession" -> "Job satisfaction"

"Yrs in Profession" -> "Job stress"

"Yrs in Profession" -> "Life Satisfaction"

"Yrs in Profession" -> "Psych safety"

"Yrs in Profession" -> "Self-reported health"

"Yrs in Profession" -> "Social support"

"Yrs in Profession" -> "Work engage"

"Yrs in Profession" -> "Workplace prep"

"Yrs in Profession" -> Alcohol

"Yrs in Profession" -> BMI

"Yrs in Profession" -> Control

"Yrs in Profession" -> Income

"Yrs in Profession" -> Optimism

"Yrs in Profession" -> Purpose

"Yrs in Profession" -> Redeployed

"Yrs in Profession" -> Resilience

"Yrs in Profession" -> Sleep

"Yrs in Profession" -> WFH

Alcohol -> "Life Satisfaction"

BMI -> "Life Satisfaction"

Control -> "Life Satisfaction"

Income -> "Life Satisfaction"

Optimism -> "Life Satisfaction"

PA -> "Life Satisfaction"

Profession -> "Life Satisfaction"

Profession -> "Yrs in Profession"

Purpose -> "Life Satisfaction"

Redeployed -> "Life Satisfaction"

Resilience -> "Life Satisfaction"

Rurality -> "Life Satisfaction"

Sleep -> "Life Satisfaction"

WFH -> "Life Satisfaction"

}

## Working from Home

dag {

bb="0,0,1,1"

"Age group" [pos="0.095,0.126"]

"Compassion fatigue" [latent,pos="0.631,0.056"]

"Education level" [pos="0.130,0.049"]

"Employment status" [pos="0.072,0.621"]

"Health S Utilisation" [pos="0.751,0.914"]

"Income concerns" [pos="0.049,0.260"]

"Job satisfaction" [pos="0.474,0.922"]

"Job stress" [pos="0.562,0.922"]

"Life Satisfaction" [outcome,pos="0.671,0.508"]

"Life events" [pos="0.091,0.903"]

"Neigh trust" [pos="0.296,0.059"]

"Psych safety" [pos="0.634,0.918"]

"Self-efficacy" [pos="0.908,0.073"]

"Self-reported health" [pos="0.763,0.823"]

"Sex at birth" [pos="0.031,0.528"]

"Social media" [pos="0.042,0.160"]

"Social support" [pos="0.947,0.348"]

"Work engage" [pos="0.328,0.867"]

"Work from home" [exposure,pos="0.249,0.515"]

"Workplace prep" [pos="0.391,0.930"]

"Years in Profession" [pos="0.077,0.717"]

"life events" [pos="0.205,0.044"]

Alcohol [pos="0.863,0.955"]

Anxiety [pos="0.464,0.031"]

BMI [pos="0.961,0.749"]

Burnout [pos="0.562,0.039"]

Control [pos="0.960,0.229"]

Diet [pos="0.927,0.935"]

FoC [pos="0.956,0.570"]

Income [pos="0.050,0.356"]

Optimism [pos="0.744,0.021"]

PA [pos="0.963,0.661"]

Profession [pos="0.074,0.823"]

Purpose [pos="0.959,0.466"]

Redeployed [pos="0.240,0.911"]

Resilience [pos="0.824,0.045"]

Rurality [pos="0.044,0.431"]

SOC [pos="0.945,0.147"]

Shiftwork [pos="0.161,0.920"]

Sleep [pos="0.957,0.856"]

"Age group" -> "Life Satisfaction"

"Age group" -> "Work from home"

"Compassion fatigue" -> "Life Satisfaction"

"Education level" -> "Life Satisfaction"

"Education level" -> "Work from home"

"Employment status" -> "Life Satisfaction"

"Employment status" -> "Work from home"

"Employment status" -> Rurality

"Health S Utilisation" <-> "Work from home"

"Income concerns" -> "Life Satisfaction"

"Job satisfaction" -> "Life Satisfaction"

"Job stress" -> "Job satisfaction"

"Job stress" -> "Life Satisfaction"

"Job stress" -> Anxiety

"Life Satisfaction" -> "Health S Utilisation"

"Life Satisfaction" -> Alcohol

"Life Satisfaction" <-> "Work from home"

"Life events" -> "Life Satisfaction"

"Life events" -> "Work from home"

"Neigh trust" -> "Life Satisfaction"

"Psych safety" -> "Job satisfaction"

"Psych safety" -> "Life Satisfaction"

"Psych safety" -> Anxiety

"Self-efficacy" -> "Life Satisfaction"

"Self-efficacy" -> Resilience

"Self-efficacy" <-> "Work from home"

"Self-reported health" -> "Life Satisfaction"

"Sex at birth" -> "Life Satisfaction"

"Sex at birth" -> "Work from home"

"Social media" -> "Life Satisfaction"

"Social media" <-> "Work from home"

"Social support" -> "Life Satisfaction"

"Social support" <-> "Work from home"

"Work engage" -> "Life Satisfaction"

"Work from home" -> "Compassion fatigue"

"Work from home" -> "Job satisfaction"

"Work from home" -> "Job stress"

"Work from home" -> "Neigh trust"

"Work from home" -> "Psych safety"

"Work from home" -> "Self-reported health"

"Work from home" -> "Work engage"

"Work from home" -> Alcohol

"Work from home" -> Anxiety

"Work from home" -> BMI

"Work from home" -> Burnout

"Work from home" -> Control

"Work from home" -> Diet

"Work from home" -> Optimism

"Work from home" -> PA

"Work from home" -> Redeployed

"Work from home" -> Resilience

"Work from home" -> Sleep

"Work from home" <-> FoC

"Workplace prep" -> "Life Satisfaction"

"Workplace prep" -> "Work from home"

"Years in Profession" -> "Life Satisfaction"

"Years in Profession" -> "Work from home"

"life events" -> "Life Satisfaction"

"life events" -> "Work from home"

Anxiety -> "Life Satisfaction"

Anxiety -> "Neigh trust"

BMI -> "Life Satisfaction"

BMI -> Sleep

Burnout -> "Life Satisfaction"

Control -> "Life Satisfaction"

Diet -> "Life Satisfaction"

FoC -> "Life Satisfaction"

Income -> "Life Satisfaction"

Optimism -> "Life Satisfaction"

Optimism -> "Neigh trust"

PA -> "Life Satisfaction"

PA -> Sleep

Profession -> "Life Satisfaction"

Profession -> "Work from home"

Purpose -> "Life Satisfaction"

Redeployed -> "Life Satisfaction"

Resilience -> "Life Satisfaction"

Rurality -> "Life Satisfaction"

Rurality -> "Work from home"

SOC -> "Life Satisfaction"

Shiftwork -> "Life Satisfaction"

Shiftwork -> "Work from home"

Sleep -> "Life Satisfaction"

}

## Redeployment and Life Satisfaction

Dag {

bb="0,0,1,1"

"Age group" [pos="0.041,0.416"]

"Compassion fatigue" [latent,pos="0.939,0.194"]

"Depressive symptoms" [pos="0.801,0.060"]

"Education level" [pos="0.196,0.047"]

"Employment status" [pos="0.057,0.609"]

"Health S Utilisation" [pos="0.947,0.625"]

"Income concerns" [pos="0.088,0.083"]

"Job satisfaction" [pos="0.950,0.411"]

"Job stress" [pos="0.952,0.547"]

"Life Satisfaction" [outcome,pos="0.671,0.508"]

"Neigh trust" [pos="0.336,0.901"]

"Psych safety" [pos="0.934,0.324"]

"Self-efficacy" [pos="0.330,0.047"]

"Self-reported health" [pos="0.349,0.801"]

"Sex at birth" [pos="0.042,0.292"]

"Social media" [pos="0.121,0.018"]

"Social support" [pos="0.939,0.791"]

"Work engage" [pos="0.512,0.908"]

"Workplace prep" [pos="0.580,0.811"]

"Years in profession" [pos="0.082,0.823"]

"life events" [pos="0.273,0.921"]

Alcohol [pos="0.727,0.918"]

Anxiety [pos="0.686,0.039"]

BMI [pos="0.941,0.874"]

Burnout [pos="0.915,0.117"]

Control [pos="0.832,0.780"]

FoC [pos="0.964,0.714"]

Income [pos="0.039,0.178"]

Optimism [pos="0.496,0.040"]

PA [pos="0.641,0.923"]

Profession [pos="0.040,0.736"]

Purpose [pos="0.397,0.040"]

Redeployed [exposure,pos="0.255,0.499"]

Resilience [pos="0.262,0.038"]

Rurality [pos="0.038,0.521"]

SOC [pos="0.591,0.044"]

Shiftwork [pos="0.169,0.897"]

Sleep [pos="0.843,0.886"]

Smoking [pos="0.791,0.908"]

WFH [pos="0.425,0.906"]

"Age group" -> "Life Satisfaction"

"Age group" -> Redeployed

"Compassion fatigue" -> "Life Satisfaction"

"Depressive symptoms" -> "Life Satisfaction"

"Education level" -> "Life Satisfaction"

"Education level" -> Income

"Education level" -> Redeployed

"Employment status" -> "Life Satisfaction"

"Employment status" -> Redeployed

"Income concerns" -> "Life Satisfaction"

"Job satisfaction" -> "Life Satisfaction"

"Job stress" -> "Job satisfaction"

"Job stress" -> "Life Satisfaction"

"Job stress" -> Anxiety

"Life Satisfaction" -> "Health S Utilisation"

"Life Satisfaction" -> Alcohol

"Life Satisfaction" -> Smoking

"Neigh trust" -> "Life Satisfaction"

"Psych safety" -> "Depressive symptoms"

"Psych safety" -> "Job satisfaction"

"Psych safety" -> "Life Satisfaction"

"Psych safety" -> Anxiety

"Self-efficacy" -> "Life Satisfaction"

"Self-efficacy" -> Resilience

"Self-reported health" -> "Life Satisfaction"

"Sex at birth" -> "Life Satisfaction"

"Sex at birth" -> Redeployed

"Social media" -> "Life Satisfaction"

"Social support" -> "Life Satisfaction"

"Work engage" -> "Life Satisfaction"

"Workplace prep" -> "Life Satisfaction"

"Years in profession" -> "Life Satisfaction"

"Years in profession" -> Redeployed

"life events" -> "Life Satisfaction"

Alcohol -> Smoking

Alcohol <-> Redeployed

Anxiety -> "Depressive symptoms"

Anxiety -> "Life Satisfaction"

BMI -> "Life Satisfaction"

BMI -> Sleep

Burnout -> "Life Satisfaction"

Control -> "Life Satisfaction"

FoC -> "Life Satisfaction"

Income -> "Income concerns"

Income -> "Life Satisfaction"

Optimism -> "Depressive symptoms"

Optimism -> "Life Satisfaction"

PA -> "Life Satisfaction"

PA -> Sleep

Profession -> "Life Satisfaction"

Profession -> Redeployed

Purpose -> "Life Satisfaction"

Redeployed -> "Compassion fatigue"

Redeployed -> "Depressive symptoms"

Redeployed -> "Health S Utilisation"

Redeployed -> "Income concerns"

Redeployed -> "Job satisfaction"

Redeployed -> "Job stress"

Redeployed -> "Life Satisfaction"

Redeployed -> "Psych safety"

Redeployed -> "Self-efficacy"

Redeployed -> "Self-reported health"

Redeployed -> "Social media"

Redeployed -> "Social support"

Redeployed -> "Work engage"

Redeployed -> "Workplace prep"

Redeployed -> Anxiety

Redeployed -> BMI

Redeployed -> Burnout

Redeployed -> Control

Redeployed -> FoC

Redeployed -> Income

Redeployed -> Optimism

Redeployed -> PA

Redeployed -> Resilience

Redeployed -> Sleep

Redeployed -> Smoking

Redeployed -> WFH

Resilience -> "Life Satisfaction"

Rurality -> "Life Satisfaction"

Rurality -> Redeployed

SOC -> "Life Satisfaction"

Shiftwork -> "Life Satisfaction"

Sleep -> "Life Satisfaction"

WFH -> "Life Satisfaction"

}

## Shift work

dag {

bb="0,0,1,1"

"Age group" [pos="0.095,0.126"]

"Compassion fatigue" [latent,pos="0.631,0.056"]

"Education level" [pos="0.130,0.049"]

"Employment status" [pos="0.081,0.697"]

"Health S Utilisation" [pos="0.737,0.887"]

"Income concerns" [pos="0.049,0.260"]

"Job satisfaction" [pos="0.474,0.922"]

"Job stress" [pos="0.562,0.922"]

"Life Satisfaction" [outcome,pos="0.671,0.508"]

"Neigh trust" [pos="0.296,0.059"]

"Psych safety" [pos="0.634,0.918"]

"Self-efficacy" [pos="0.908,0.073"]

"Self-reported health" [pos="0.754,0.794"]

"Sex at birth" [pos="0.056,0.582"]

"Shift work" [exposure,pos="0.249,0.515"]

"Social media" [pos="0.042,0.160"]

"Social support" [pos="0.947,0.348"]

"Work engage" [pos="0.306,0.887"]

"Workplace prep" [pos="0.396,0.857"]

"life events" [pos="0.205,0.044"]

Alcohol [pos="0.851,0.917"]

Anxiety [pos="0.464,0.031"]

BMI [pos="0.961,0.749"]

Burnout [pos="0.562,0.039"]

Control [pos="0.960,0.229"]

Diet [pos="0.927,0.935"]

FoC [pos="0.965,0.557"]

Income [pos="0.044,0.384"]

Optimism [pos="0.744,0.021"]

PA [pos="0.963,0.661"]

Profession [pos="0.074,0.823"]

Purpose [pos="0.959,0.466"]

Redeployed [pos="0.234,0.921"]

Resilience [pos="0.824,0.045"]

Rurality [pos="0.044,0.483"]

SOC [pos="0.945,0.147"]

Sleep [pos="0.957,0.856"]

WFH [pos="0.161,0.920"]

"Age group" -> "Life Satisfaction"

"Age group" -> "Shift work"

"Compassion fatigue" -> "Life Satisfaction"

"Education level" -> "Life Satisfaction"

"Education level" -> "Shift work"

"Employment status" -> "Life Satisfaction"

"Employment status" -> "Shift work"

"Employment status" -> Rurality

"Health S Utilisation" <-> "Shift work"

"Income concerns" -> "Life Satisfaction"

"Job satisfaction" -> "Life Satisfaction"

"Job stress" -> "Job satisfaction"

"Job stress" -> "Life Satisfaction"

"Job stress" -> Anxiety

"Life Satisfaction" -> "Health S Utilisation"

"Life Satisfaction" -> Alcohol

"Life Satisfaction" <-> "Shift work"

"Neigh trust" -> "Life Satisfaction"

"Psych safety" -> "Job satisfaction"

"Psych safety" -> "Life Satisfaction"

"Psych safety" -> Anxiety

"Self-efficacy" -> "Life Satisfaction"

"Self-efficacy" -> Resilience

"Self-efficacy" <-> "Shift work"

"Self-reported health" -> "Life Satisfaction"

"Sex at birth" -> "Life Satisfaction"

"Sex at birth" -> "Shift work"

"Shift work" -> "Compassion fatigue"

"Shift work" -> "Job satisfaction"

"Shift work" -> "Job stress"

"Shift work" -> "Psych safety"

"Shift work" -> "Self-reported health"

"Shift work" -> "Work engage"

"Shift work" -> "Workplace prep"

"Shift work" -> Alcohol

"Shift work" -> Anxiety

"Shift work" -> BMI

"Shift work" -> Burnout

"Shift work" -> Control

"Shift work" -> Diet

"Shift work" -> FoC

"Shift work" -> Income

"Shift work" -> Optimism

"Shift work" -> PA

"Shift work" -> Resilience

"Shift work" -> SOC

"Shift work" -> Sleep

"Shift work" -> WFH

"Shift work" <-> "Social media"

"Social media" -> "Life Satisfaction"

"Social support" -> "Life Satisfaction"

"Work engage" -> "Life Satisfaction"

"Workplace prep" -> "Life Satisfaction"

"life events" -> "Life Satisfaction"

Anxiety -> "Life Satisfaction"

Anxiety -> "Neigh trust"

BMI -> "Life Satisfaction"

BMI -> Sleep

Burnout -> "Life Satisfaction"

Control -> "Life Satisfaction"

Diet -> "Life Satisfaction"

FoC -> "Life Satisfaction"

Income -> "Income concerns"

Income -> "Life Satisfaction"

Optimism -> "Life Satisfaction"

Optimism -> "Neigh trust"

PA -> "Life Satisfaction"

PA -> Sleep

Profession -> "Life Satisfaction"

Profession -> "Shift work"

Purpose -> "Life Satisfaction"

Redeployed -> "Life Satisfaction"

Redeployed -> "Shift work"

Resilience -> "Life Satisfaction"

Rurality -> "Life Satisfaction"

Rurality -> "Shift work"

SOC -> "Life Satisfaction"

Sleep -> "Life Satisfaction"

WFH -> "Life Satisfaction"

}

## Work Engagement

dag {

bb="0,0,1,1"

"Age group" [pos="0.095,0.126"]

"Compassion fatigue" [latent,pos="0.631,0.056"]

"Education level" [pos="0.130,0.049"]

"Employment status" [pos="0.075,0.691"]

"Health S Utilisation" [pos="0.753,0.910"]

"Income concerns" [pos="0.079,0.269"]

"Job satisfaction" [pos="0.438,0.827"]

"Job stress" [pos="0.533,0.841"]

"Life Satisfaction" [outcome,pos="0.671,0.508"]

"Neigh trust" [pos="0.296,0.059"]

"Psych safety" [pos="0.634,0.918"]

"Self-efficacy" [pos="0.908,0.073"]

"Self-reported health" [pos="0.755,0.798"]

"Sex at birth" [pos="0.058,0.585"]

"Social media" [pos="0.042,0.160"]

"Social support" [pos="0.947,0.348"]

"Work engagement" [exposure,pos="0.249,0.515"]

"Workplace prep" [pos="0.402,0.908"]

"life events" [pos="0.205,0.044"]

Alcohol [pos="0.851,0.908"]

Anxiety [pos="0.464,0.031"]

BMI [pos="0.961,0.749"]

Burnout [pos="0.562,0.039"]

Control [pos="0.960,0.229"]

Diet [pos="0.927,0.935"]

FoC [pos="0.965,0.557"]

Income [pos="0.044,0.384"]

Optimism [pos="0.744,0.021"]

PA [pos="0.963,0.661"]

Profession [pos="0.074,0.823"]

Purpose [pos="0.959,0.466"]

Redeployed [pos="0.235,0.851"]

Resilience [pos="0.824,0.045"]

Rurality [pos="0.044,0.483"]

SOC [pos="0.945,0.147"]

Shiftwork [pos="0.308,0.893"]

Sleep [pos="0.957,0.856"]

WFH [pos="0.137,0.903"]

"Age group" -> "Life Satisfaction"

"Age group" -> "Work engagement"

"Compassion fatigue" -> "Life Satisfaction"

"Education level" -> "Life Satisfaction"

"Education level" -> "Work engagement"

"Employment status" -> "Life Satisfaction"

"Employment status" -> "Work engagement"

"Employment status" -> Rurality

"Health S Utilisation" <-> "Work engagement"

"Income concerns" -> "Life Satisfaction"

"Income concerns" -> "Work engagement"

"Job satisfaction" -> "Life Satisfaction"

"Job stress" -> "Job satisfaction"

"Job stress" -> "Life Satisfaction"

"Job stress" -> "Work engagement"

"Job stress" -> Anxiety

"Life Satisfaction" -> "Health S Utilisation"

"Life Satisfaction" -> Alcohol

"Life Satisfaction" <-> "Work engagement"

"Neigh trust" -> "Life Satisfaction"

"Psych safety" -> "Job satisfaction"

"Psych safety" -> "Life Satisfaction"

"Psych safety" -> Anxiety

"Self-efficacy" -> "Life Satisfaction"

"Self-efficacy" -> Resilience

"Self-efficacy" <-> "Work engagement"

"Self-reported health" -> "Life Satisfaction"

"Sex at birth" -> "Life Satisfaction"

"Sex at birth" -> "Work engagement"

"Social media" -> "Life Satisfaction"

"Social media" <-> "Work engagement"

"Social support" -> "Life Satisfaction"

"Social support" -> "Work engagement"

"Work engagement" -> "Compassion fatigue"

"Work engagement" -> "Job satisfaction"

"Work engagement" -> "Psych safety"

"Work engagement" -> "Self-reported health"

"Work engagement" -> Alcohol

"Work engagement" -> Anxiety

"Work engagement" -> BMI

"Work engagement" -> Burnout

"Work engagement" -> Control

"Work engagement" -> Diet

"Work engagement" -> Optimism

"Work engagement" -> PA

"Work engagement" -> Resilience

"Work engagement" -> SOC

"Work engagement" -> Sleep

"Workplace prep" -> "Life Satisfaction"

"Workplace prep" -> "Work engagement"

"life events" -> "Life Satisfaction"

"life events" -> "Work engagement"

Anxiety -> "Life Satisfaction"

Anxiety -> "Neigh trust"

BMI -> "Life Satisfaction"

BMI -> Sleep

Burnout -> "Life Satisfaction"

Control -> "Life Satisfaction"

Diet -> "Life Satisfaction"

FoC -> "Life Satisfaction"

FoC -> "Work engagement"

Income -> "Income concerns"

Income -> "Life Satisfaction"

Income -> "Work engagement"

Optimism -> "Life Satisfaction"

Optimism -> "Neigh trust"

PA -> "Life Satisfaction"

PA -> Sleep

Profession -> "Life Satisfaction"

Profession -> "Work engagement"

Purpose -> "Life Satisfaction"

Purpose -> "Work engagement"

Redeployed -> "Life Satisfaction"

Redeployed -> "Work engagement"

Resilience -> "Life Satisfaction"

Rurality -> "Life Satisfaction"

Rurality -> "Work engagement"

SOC -> "Life Satisfaction"

Shiftwork -> "Life Satisfaction"

Shiftwork -> "Work engagement"

Sleep -> "Life Satisfaction"

WFH -> "Life Satisfaction"

WFH -> "Work engagement"

}

## Perceived workplace pandemic preparedness and Life Satisfaction

dag {

bb="0,0,1,1"

"Age group" [pos="0.048,0.213"]

"Compassion fatigue" [latent,pos="0.939,0.251"]

"Depressive symptoms" [pos="0.919,0.111"]

"Education level" [pos="0.273,0.044"]

"Employment status" [pos="0.072,0.425"]

"Health S Utilisation" [pos="0.949,0.695"]

"Income concerns" [pos="0.211,0.170"]

"Job satisfaction" [pos="0.678,0.881"]

"Job stress" [pos="0.581,0.897"]

"Life Satisfaction" [outcome,pos="0.671,0.508"]

"Neigh trust" [pos="0.038,0.621"]

"Self-efficacy" [pos="0.384,0.043"]

"Self-reported health" [pos="0.913,0.588"]

"Sex at birth" [pos="0.055,0.103"]

"Social media" [pos="0.046,0.530"]

"Social support" [pos="0.937,0.336"]

"Work engage" [pos="0.485,0.881"]

"Workplace prep" [exposure,pos="0.188,0.573"]

"Years in Profession" [pos="0.129,0.748"]

"life events" [pos="0.045,0.699"]

Alcohol [pos="0.768,0.906"]

Anxiety [pos="0.828,0.035"]

BMI [pos="0.944,0.787"]

Burnout [pos="0.948,0.179"]

Control [pos="0.947,0.508"]

FoC [pos="0.947,0.417"]

Income [pos="0.109,0.055"]

Optimism [pos="0.534,0.047"]

PA [pos="0.977,0.865"]

Profession [pos="0.064,0.858"]

Purpose [pos="0.453,0.041"]

Redeployed [pos="0.269,0.873"]

Resilience [pos="0.750,0.044"]

Rurality [pos="0.039,0.308"]

SOC [pos="0.618,0.028"]

Shiftwork [pos="0.165,0.884"]

Sleep [pos="0.940,0.906"]

Smoking [pos="0.861,0.900"]

WFH [pos="0.382,0.894"]

"Age group" -> "Life Satisfaction"

"Age group" -> "Workplace prep"

"Compassion fatigue" -> "Life Satisfaction"

"Compassion fatigue" -> "Workplace prep"

"Depressive symptoms" -> "Life Satisfaction"

"Education level" -> "Life Satisfaction"

"Education level" -> "Workplace prep"

"Education level" -> Income

"Employment status" -> "Life Satisfaction"

"Employment status" -> "Workplace prep"

"Employment status" -> Income

"Income concerns" -> "Life Satisfaction"

"Job satisfaction" -> "Life Satisfaction"

"Job stress" -> "Job satisfaction"

"Job stress" -> "Life Satisfaction"

"Job stress" -> Anxiety

"Life Satisfaction" -> "Health S Utilisation"

"Life Satisfaction" -> Alcohol

"Life Satisfaction" -> Smoking

"Neigh trust" -> "Life Satisfaction"

"Self-efficacy" -> "Life Satisfaction"

"Self-efficacy" -> Resilience

"Self-reported health" -> "Life Satisfaction"

"Sex at birth" -> "Life Satisfaction"

"Sex at birth" -> "Workplace prep"

"Social media" -> "Life Satisfaction"

"Social support" -> "Life Satisfaction"

"Work engage" -> "Life Satisfaction"

"Workplace prep" -> "Depressive symptoms"

"Workplace prep" -> "Health S Utilisation"

"Workplace prep" -> "Job satisfaction"

"Workplace prep" -> "Job stress"

"Workplace prep" -> "Life Satisfaction"

"Workplace prep" -> "Self-efficacy"

"Workplace prep" -> "Self-reported health"

"Workplace prep" -> "Social media"

"Workplace prep" -> "Social support"

"Workplace prep" -> "Work engage"

"Workplace prep" -> Alcohol

"Workplace prep" -> Anxiety

"Workplace prep" -> BMI

"Workplace prep" -> Burnout

"Workplace prep" -> Control

"Workplace prep" -> FoC

"Workplace prep" -> Optimism

"Workplace prep" -> Resilience

"Workplace prep" -> SOC

"Workplace prep" -> Sleep

"Workplace prep" -> Smoking

"Years in Profession" -> "Life Satisfaction"

"Years in Profession" -> "Workplace prep"

"life events" -> "Life Satisfaction"

Alcohol -> Smoking

Anxiety -> "Depressive symptoms"

Anxiety -> "Life Satisfaction"

BMI -> "Life Satisfaction"

BMI -> Sleep

Burnout -> "Life Satisfaction"

Control -> "Life Satisfaction"

FoC -> "Life Satisfaction"

Income -> "Income concerns"

Income -> "Life Satisfaction"

Optimism -> "Life Satisfaction"

PA -> "Life Satisfaction"

PA -> Sleep

Profession -> "Life Satisfaction"

Profession -> "Workplace prep"

Purpose -> "Life Satisfaction"

Redeployed -> "Life Satisfaction"

Redeployed -> "Workplace prep"

Resilience -> "Life Satisfaction"

Rurality -> "Life Satisfaction"

Rurality -> "Workplace prep"

SOC -> "Life Satisfaction"

Shiftwork -> "Life Satisfaction"

Shiftwork -> "Workplace prep"

Sleep -> "Life Satisfaction"

WFH -> "Life Satisfaction"

WFH -> "Workplace prep"

}

## Job satisfaction and Life satisfaction

dag {

bb="0,0,1,1"

"Age group" [pos="0.039,0.332"]

"Compassion fatigue" [latent,pos="0.884,0.053"]

"Depressive symptoms" [pos="0.710,0.054"]

"Education level" [pos="0.194,0.045"]

"Employment status" [pos="0.076,0.574"]

"Health S Utilisation" [pos="0.847,0.916"]

"Income concerns" [pos="0.250,0.159"]

"Job satisfaction" [exposure,pos="0.258,0.522"]

"Job stress" [pos="0.946,0.220"]

"Life Satisfaction" [outcome,pos="0.671,0.508"]

"Neigh trust" [pos="0.259,0.920"]

"Self-efficacy" [pos="0.293,0.045"]

"Self-reported health" [pos="0.499,0.925"]

"Sex at birth" [pos="0.047,0.207"]

"Social media" [pos="0.214,0.824"]

"Social support" [pos="0.932,0.326"]

"Work engage" [pos="0.630,0.891"]

"Work psych support" [pos="0.737,0.858"]

"Workplace prep" [pos="0.132,0.918"]

"Years in Profession" [pos="0.083,0.768"]

"life events" [pos="0.343,0.923"]

Alcohol [pos="0.918,0.890"]

Anxiety [pos="0.614,0.027"]

BMI [pos="0.963,0.546"]

Burnout [pos="0.811,0.047"]

Control [pos="0.912,0.132"]

FoC [pos="0.963,0.441"]

Income [pos="0.072,0.095"]

Optimism [pos="0.444,0.044"]

PA [pos="0.942,0.726"]

Profession [pos="0.053,0.685"]

Purpose [pos="0.369,0.047"]

Redeployed [pos="0.414,0.886"]

Resilience [pos="0.491,0.026"]

Rurality [pos="0.039,0.470"]

SOC [pos="0.536,0.035"]

Shiftwork [pos="0.066,0.878"]

Sleep [pos="0.956,0.642"]

Smoking [pos="0.953,0.814"]

WFH [pos="0.554,0.863"]

"Age group" -> "Job satisfaction"

"Age group" -> "Life Satisfaction"

"Compassion fatigue" -> "Job satisfaction"

"Compassion fatigue" -> "Life Satisfaction"

"Depressive symptoms" -> "Life Satisfaction"

"Education level" -> "Job satisfaction"

"Education level" -> "Life Satisfaction"

"Education level" -> Income

"Employment status" -> "Job satisfaction"

"Employment status" -> "Life Satisfaction"

"Employment status" -> Income

"Income concerns" -> "Job satisfaction"

"Income concerns" -> "Life Satisfaction"

"Job satisfaction" -> "Depressive symptoms"

"Job satisfaction" -> "Health S Utilisation"

"Job satisfaction" -> "Life Satisfaction"

"Job satisfaction" -> "Social media"

"Job satisfaction" -> "Work engage"

"Job satisfaction" -> Alcohol

"Job satisfaction" -> Anxiety

"Job satisfaction" -> Burnout

"Job satisfaction" -> Control

"Job satisfaction" -> Optimism

"Job satisfaction" -> PA

"Job satisfaction" -> Sleep

"Job satisfaction" -> Smoking

"Job satisfaction" <-> "Self-reported health"

"Job satisfaction" <-> BMI

"Job satisfaction" <-> Purpose

"Job stress" -> "Job satisfaction"

"Job stress" -> "Life Satisfaction"

"Life Satisfaction" -> "Health S Utilisation"

"Life Satisfaction" -> Alcohol

"Life Satisfaction" -> Smoking

"Neigh trust" -> "Life Satisfaction"

"Self-efficacy" -> "Job satisfaction"

"Self-efficacy" -> "Life Satisfaction"

"Self-efficacy" -> Resilience

"Self-reported health" -> "Life Satisfaction"

"Sex at birth" -> "Job satisfaction"

"Sex at birth" -> "Life Satisfaction"

"Social media" -> "Life Satisfaction"

"Social support" -> "Job satisfaction"

"Social support" -> "Life Satisfaction"

"Work engage" -> "Life Satisfaction"

"Work psych support" -> "Job satisfaction"

"Work psych support" -> "Life Satisfaction"

"Workplace prep" -> "Job satisfaction"

"Workplace prep" -> "Life Satisfaction"

"Years in Profession" -> "Job satisfaction"

"Years in Profession" -> "Life Satisfaction"

"life events" -> "Life Satisfaction"

"life events" -> "Neigh trust"

Alcohol -> Smoking

Anxiety -> "Depressive symptoms"

Anxiety -> "Life Satisfaction"

BMI -> "Life Satisfaction"

BMI -> Sleep

Burnout -> "Life Satisfaction"

Control -> "Life Satisfaction"

FoC -> "Job satisfaction"

FoC -> "Life Satisfaction"

Income -> "Income concerns"

Income -> "Job satisfaction"

Income -> "Life Satisfaction"

Optimism -> "Life Satisfaction"

PA -> "Life Satisfaction"

PA -> Sleep

Profession -> "Job satisfaction"

Profession -> "Life Satisfaction"

Purpose -> "Life Satisfaction"

Redeployed -> "Job satisfaction"

Redeployed -> "Life Satisfaction"

Resilience -> "Job satisfaction"

Resilience -> "Life Satisfaction"

Rurality -> "Job satisfaction"

Rurality -> "Life Satisfaction"

SOC -> "Job satisfaction"

SOC -> "Life Satisfaction"

Shiftwork -> "Job satisfaction"

Shiftwork -> "Life Satisfaction"

Sleep -> "Life Satisfaction"

WFH -> "Job satisfaction"

WFH -> "Life Satisfaction"

}

## Job Stress and Life Satisfaction

dag {

bb="0,0,1,1"

"Age group" [pos="0.095,0.126"]

"Compassion fatigue" [latent,pos="0.560,0.043"]

"Education level" [pos="0.130,0.049"]

"Employment status" [pos="0.072,0.705"]

"Health S Utilisation" [pos="0.708,0.823"]

"Income concerns" [pos="0.068,0.288"]

"Job satisfaction" [pos="0.474,0.922"]

"Job stress " [exposure,pos="0.249,0.515"]

"Life Satisfaction" [outcome,pos="0.671,0.508"]

"Neigh trust" [pos="0.296,0.059"]

"Psych safety" [pos="0.634,0.918"]

"Self-efficacy" [pos="0.908,0.073"]

"Self-reported health" [pos="0.795,0.914"]

"Sex at birth" [pos="0.053,0.585"]

"Social media" [pos="0.133,0.227"]

"Social support" [pos="0.947,0.348"]

"Work engage" [pos="0.539,0.885"]

"Workplace prep" [pos="0.387,0.874"]

"life events" [pos="0.221,0.033"]

Alcohol [pos="0.816,0.811"]

Anxiety [pos="0.425,0.043"]

BMI [pos="0.961,0.749"]

Burnout [pos="0.489,0.040"]

Control [pos="0.960,0.229"]

Depressive [pos="0.661,0.087"]

Diet [pos="0.907,0.881"]

FoC [pos="0.965,0.557"]

Income [pos="0.044,0.384"]

Optimism [pos="0.747,0.056"]

PA [pos="0.963,0.661"]

Profession [pos="0.074,0.823"]

Purpose [pos="0.959,0.466"]

Redeployed [pos="0.212,0.887"]

Resilience [pos="0.824,0.045"]

Rurality [pos="0.044,0.483"]

SOC [pos="0.945,0.147"]

Shiftwork [pos="0.293,0.896"]

Sleep [pos="0.957,0.856"]

WFH [pos="0.130,0.904"]

"Age group" -> "Job stress "

"Age group" -> "Life Satisfaction"

"Compassion fatigue" -> "Life Satisfaction"

"Education level" -> "Job stress "

"Education level" -> "Life Satisfaction"

"Employment status" -> "Job stress "

"Employment status" -> "Life Satisfaction"

"Employment status" -> Rurality

"Health S Utilisation" <-> "Job stress "

"Income concerns" -> "Job stress "

"Income concerns" -> "Life Satisfaction"

"Job satisfaction" -> "Life Satisfaction"

"Job stress " -> "Compassion fatigue"

"Job stress " -> "Job satisfaction"

"Job stress " -> "Self-reported health"

"Job stress " -> "Social support"

"Job stress " -> "Work engage"

"Job stress " -> Alcohol

"Job stress " -> Anxiety

"Job stress " -> BMI

"Job stress " -> Burnout

"Job stress " -> Depressive

"Job stress " -> Diet

"Job stress " -> Optimism

"Job stress " -> PA

"Job stress " -> Sleep

"Job stress " <-> "Social media"

"Life Satisfaction" -> "Health S Utilisation"

"Life Satisfaction" -> Alcohol

"Neigh trust" -> "Life Satisfaction"

"Psych safety" -> "Job satisfaction"

"Psych safety" -> "Job stress "

"Psych safety" -> "Life Satisfaction"

"Psych safety" -> Anxiety

"Self-efficacy" -> "Job stress "

"Self-efficacy" -> "Life Satisfaction"

"Self-efficacy" -> Resilience

"Self-reported health" -> "Life Satisfaction"

"Sex at birth" -> "Job stress "

"Sex at birth" -> "Life Satisfaction"

"Social media" -> "Life Satisfaction"

"Social support" -> "Life Satisfaction"

"Work engage" -> "Job satisfaction"

"Work engage" -> "Life Satisfaction"

"Work engage" -> Anxiety

"Workplace prep" -> "Job stress "

"Workplace prep" -> "Life Satisfaction"

"life events" -> "Job stress "

"life events" -> "Life Satisfaction"

Anxiety -> "Life Satisfaction"

Anxiety -> "Neigh trust"

BMI -> "Life Satisfaction"

BMI -> Sleep

Burnout -> "Life Satisfaction"

Control -> "Job stress "

Control -> "Life Satisfaction"

Depressive -> "Life Satisfaction"

Diet -> "Life Satisfaction"

FoC -> "Job stress "

FoC -> "Life Satisfaction"

Income -> "Income concerns"

Income -> "Job stress "

Income -> "Life Satisfaction"

Optimism -> "Life Satisfaction"

Optimism -> "Neigh trust"

PA -> "Life Satisfaction"

PA -> Sleep

Profession -> "Job stress "

Profession -> "Life Satisfaction"

Purpose -> "Job stress "

Purpose -> "Life Satisfaction"

Redeployed -> "Job stress "

Redeployed -> "Life Satisfaction"

Resilience -> "Job stress "

Resilience -> "Life Satisfaction"

Rurality -> "Job stress "

Rurality -> "Life Satisfaction"

SOC -> "Job stress "

SOC -> "Life Satisfaction"

Shiftwork -> "Job stress "

Shiftwork -> "Life Satisfaction"

Sleep -> "Life Satisfaction"

WFH -> "Job stress "

WFH -> "Life Satisfaction"

}

## Workplace psychological safety and Life Satisfaction

dag {

bb="0,0,1,1"

"Age group" [pos="0.040,0.367"]

"Compassion fatigue" [latent,pos="0.948,0.268"]

"Depressive symptoms" [pos="0.912,0.070"]

"Education level" [pos="0.358,0.103"]

"Employment status" [pos="0.062,0.599"]

"Health S Utilisation" [pos="0.693,0.815"]

"Income concerns" [pos="0.112,0.059"]

"Job satisfaction" [pos="0.245,0.864"]

"Job stress" [pos="0.954,0.605"]

"Life Satisfaction" [outcome,pos="0.671,0.508"]

"Neigh trust" [pos="0.297,0.034"]

"Self-efficacy" [pos="0.506,0.092"]

"Self-reported health" [pos="0.565,0.894"]

"Sex at birth" [pos="0.046,0.256"]

"Social media" [pos="0.197,0.037"]

"Social support" [pos="0.903,0.428"]

"Work engage" [pos="0.343,0.894"]

"Workplace prep" [pos="0.440,0.874"]

"Workplace psych safety" [exposure,pos="0.274,0.521"]

"Years in profession" [pos="0.117,0.730"]

"life events" [pos="0.449,0.033"]

Alcohol [pos="0.807,0.887"]

Anxiety [pos="0.803,0.033"]

BMI [pos="0.961,0.708"]

Burnout [pos="0.954,0.158"]

Control [pos="0.901,0.529"]

FoC [pos="0.955,0.356"]

Income [pos="0.047,0.147"]

Optimism [pos="0.626,0.036"]

PA [pos="0.960,0.913"]

Profession [pos="0.045,0.686"]

Purpose [pos="0.560,0.030"]

Redeployed [pos="0.095,0.915"]

Resilience [pos="0.720,0.029"]

Rurality [pos="0.045,0.482"]

SOC [pos="0.746,0.127"]

Shiftwork [pos="0.066,0.817"]

Sleep [pos="0.964,0.824"]

Smoking [pos="0.892,0.923"]

WFH [pos="0.163,0.903"]

"Age group" -> "Life Satisfaction"

"Age group" -> "Workplace psych safety"

"Compassion fatigue" -> "Life Satisfaction"

"Depressive symptoms" -> "Life Satisfaction"

"Education level" -> "Life Satisfaction"

"Education level" -> "Workplace psych safety"

"Education level" -> "life events"

"Education level" -> Income

"Employment status" -> "Life Satisfaction"

"Employment status" -> "Workplace psych safety"

"Employment status" -> Income

"Income concerns" -> "Life Satisfaction"

"Job satisfaction" -> "Life Satisfaction"

"Job satisfaction" -> Alcohol

"Job stress" -> "Job satisfaction"

"Job stress" -> "Life Satisfaction"

"Job stress" -> Anxiety

"Life Satisfaction" -> "Health S Utilisation"

"Life Satisfaction" -> Alcohol

"Life Satisfaction" -> Smoking

"Neigh trust" -> "Life Satisfaction"

"Self-efficacy" -> "Life Satisfaction"

"Self-efficacy" -> Resilience

"Self-reported health" -> "Life Satisfaction"

"Sex at birth" -> "Life Satisfaction"

"Sex at birth" -> "Workplace psych safety"

"Social media" -> "Life Satisfaction"

"Social support" -> "Life Satisfaction"

"Work engage" -> "Life Satisfaction"

"Workplace prep" -> "Life Satisfaction"

"Workplace prep" -> "Workplace psych safety"

"Workplace psych safety" -> "Compassion fatigue"

"Workplace psych safety" -> "Depressive symptoms"

"Workplace psych safety" -> "Health S Utilisation"

"Workplace psych safety" -> "Income concerns"

"Workplace psych safety" -> "Job satisfaction"

"Workplace psych safety" -> "Job stress"

"Workplace psych safety" -> "Life Satisfaction"

"Workplace psych safety" -> "Neigh trust"

"Workplace psych safety" -> "Self-efficacy"

"Workplace psych safety" -> "Self-reported health"

"Workplace psych safety" -> "Social media"

"Workplace psych safety" -> "Social support"

"Workplace psych safety" -> "Work engage"

"Workplace psych safety" -> Alcohol

"Workplace psych safety" -> Anxiety

"Workplace psych safety" -> BMI

"Workplace psych safety" -> Burnout

"Workplace psych safety" -> Control

"Workplace psych safety" -> FoC

"Workplace psych safety" -> Income

"Workplace psych safety" -> Optimism

"Workplace psych safety" -> PA

"Workplace psych safety" -> Resilience

"Workplace psych safety" -> Sleep

"Workplace psych safety" -> Smoking

"Years in profession" -> "Life Satisfaction"

"Years in profession" -> "Workplace psych safety"

"life events" -> "Life Satisfaction"

Alcohol -> Smoking

Anxiety -> "Depressive symptoms"

Anxiety -> "Life Satisfaction"

BMI -> "Life Satisfaction"

BMI -> Sleep

Burnout -> "Life Satisfaction"

Control -> "Life Satisfaction"

FoC -> "Life Satisfaction"

Income -> "Income concerns"

Income -> "Life Satisfaction"

Optimism -> "Life Satisfaction"

PA -> "Life Satisfaction"

PA -> Sleep

Profession -> "Life Satisfaction"

Profession -> "Workplace psych safety"

Purpose -> "Life Satisfaction"

Redeployed -> "Life Satisfaction"

Redeployed -> "Workplace psych safety"

Resilience -> "Life Satisfaction"

Rurality -> "Life Satisfaction"

Rurality -> "Workplace psych safety"

SOC -> "Life Satisfaction"

Shiftwork -> "Life Satisfaction"

Shiftwork -> "Workplace psych safety"

Sleep -> "Life Satisfaction"

WFH -> "Life Satisfaction"

WFH -> "Workplace psych safety"

}

## Direct COVID care

dag {

bb="0,0,1,1"

"Age group" [pos="0.095,0.126"]

"Anxiety symptoms" [pos="0.587,0.041"]

"Depressive symp" [pos="0.379,0.053"]

"Direct COVID care" [exposure,pos="0.271,0.455"]

"Education level" [pos="0.130,0.049"]

"Employment status" [pos="0.058,0.701"]

"Fear COVID" [pos="0.925,0.627"]

"Health service util" [pos="0.878,0.388"]

"Income concerns" [pos="0.049,0.260"]

"Job satisfaction" [pos="0.443,0.917"]

"Job stress" [pos="0.072,0.891"]

"Life Satisfaction" [outcome,pos="0.603,0.457"]

"Life events" [pos="0.246,0.037"]

"Marital status" [pos="0.054,0.190"]

"Psych safety" [pos="0.634,0.918"]

"Self-reported health" [pos="0.788,0.923"]

"Sex at birth" [pos="0.033,0.587"]

"Social support" [pos="0.951,0.461"]

"Work engage" [pos="0.539,0.885"]

"Workplace prep" [pos="0.374,0.827"]

Alcohol [pos="0.912,0.730"]

BMI [pos="0.957,0.856"]

Burnout [pos="0.492,0.040"]

Control [pos="0.884,0.239"]

Income [pos="0.044,0.384"]

Optimism [pos="0.690,0.037"]

PA [pos="0.850,0.890"]

Profession [pos="0.052,0.808"]

Purpose [pos="0.965,0.557"]

Redeployed [pos="0.228,0.888"]

Resilience [pos="0.787,0.055"]

Rurality [pos="0.044,0.483"]

SOC [pos="0.872,0.133"]

Shiftwork [pos="0.290,0.876"]

Sleep [pos="0.899,0.881"]

WFH [pos="0.144,0.902"]

"Age group" -> "Direct COVID care"

"Age group" -> "Life Satisfaction"

"Anxiety symptoms" -> "Life Satisfaction"

"Depressive symp" -> "Life Satisfaction"

"Direct COVID care" -> "Anxiety symptoms"

"Direct COVID care" -> "Depressive symp"

"Direct COVID care" -> "Fear COVID"

"Direct COVID care" -> "Health service util"

"Direct COVID care" -> "Job satisfaction"

"Direct COVID care" -> "Job stress"

"Direct COVID care" -> "Life Satisfaction"

"Direct COVID care" -> "Life events"

"Direct COVID care" -> "Marital status"

"Direct COVID care" -> "Psych safety"

"Direct COVID care" -> "Self-reported health"

"Direct COVID care" -> "Social support"

"Direct COVID care" -> "Work engage"

"Direct COVID care" -> "Workplace prep"

"Direct COVID care" -> Alcohol

"Direct COVID care" -> Burnout

"Direct COVID care" -> Control

"Direct COVID care" -> Income

"Direct COVID care" -> Optimism

"Direct COVID care" -> PA

"Direct COVID care" -> Purpose

"Direct COVID care" -> Redeployed

"Direct COVID care" -> Shiftwork

"Direct COVID care" -> Sleep

"Direct COVID care" -> WFH

"Education level" -> "Direct COVID care"

"Education level" -> "Life Satisfaction"

"Employment status" -> "Direct COVID care"

"Employment status" -> "Life Satisfaction"

"Fear COVID" -> "Life Satisfaction"

"Health service util" -> "Life Satisfaction"

"Income concerns" -> "Life Satisfaction"

"Job satisfaction" -> "Life Satisfaction"

"Job stress" -> "Life Satisfaction"

"Life events" -> "Life Satisfaction"

"Marital status" -> "Life Satisfaction"

"Psych safety" -> "Life Satisfaction"

"Self-reported health" -> "Life Satisfaction"

"Sex at birth" -> "Life Satisfaction"

"Social support" -> "Life Satisfaction"

"Work engage" -> "Life Satisfaction"

"Workplace prep" -> "Life Satisfaction"

Alcohol -> "Life Satisfaction"

BMI -> "Life Satisfaction"

Burnout -> "Life Satisfaction"

Control -> "Life Satisfaction"

Income -> "Life Satisfaction"

Optimism -> "Life Satisfaction"

PA -> "Life Satisfaction"

Profession -> "Direct COVID care"

Profession -> "Life Satisfaction"

Purpose -> "Life Satisfaction"

Redeployed -> "Life Satisfaction"

Resilience -> "Direct COVID care"

Resilience -> "Life Satisfaction"

Rurality -> "Direct COVID care"

Rurality -> "Life Satisfaction"

Shiftwork -> "Life Satisfaction"

Sleep -> "Life Satisfaction"

WFH -> "Life Satisfaction"

}

# Emotional health and wellbeing

## Depressive symptoms and Life Satisfaction

dag {

bb="0,0,1,1"

"Age group" [pos="0.095,0.126"]

"Compassion fatigue" [latent,pos="0.631,0.056"]

"Depressive symp" [exposure,pos="0.249,0.515"]

"Education level" [pos="0.130,0.049"]

"Employment status" [pos="0.050,0.719"]

"Health S Utilisation" [pos="0.705,0.940"]

"Income concerns" [pos="0.049,0.260"]

"Job satisfaction" [pos="0.474,0.922"]

"Job stress" [pos="0.105,0.912"]

"Life Satisfaction" [outcome,pos="0.671,0.508"]

"Neigh trust" [pos="0.296,0.059"]

"Psych safety" [pos="0.634,0.918"]

"Self-efficacy" [pos="0.908,0.073"]

"Self-reported health" [pos="0.776,0.952"]

"Sex at birth" [pos="0.033,0.587"]

"Social media" [pos="0.042,0.160"]

"Social support" [pos="0.947,0.348"]

"Work engage" [pos="0.539,0.885"]

"Workplace prep" [pos="0.391,0.930"]

"life events" [pos="0.205,0.044"]

Alcohol [pos="0.863,0.955"]

Anxiety [pos="0.464,0.031"]

BMI [pos="0.961,0.749"]

Burnout [pos="0.562,0.039"]

Control [pos="0.960,0.229"]

Diet [pos="0.927,0.935"]

FoC [pos="0.965,0.557"]

Income [pos="0.044,0.384"]

Optimism [pos="0.744,0.021"]

PA [pos="0.963,0.661"]

Profession [pos="0.074,0.823"]

Purpose [pos="0.959,0.466"]

Redeployed [pos="0.219,0.934"]

Resilience [pos="0.824,0.045"]

Rurality [pos="0.044,0.483"]

SOC [pos="0.945,0.147"]

Shiftwork [pos="0.306,0.935"]

Sleep [pos="0.957,0.856"]

WFH [pos="0.161,0.920"]

"Age group" -> "Depressive symp"

"Age group" -> "Life Satisfaction"

"Compassion fatigue" -> "Depressive symp"

"Compassion fatigue" -> "Life Satisfaction"

"Depressive symp" -> "Self-reported health"

"Depressive symp" -> Alcohol

"Depressive symp" <-> "Health S Utilisation"

"Depressive symp" <-> BMI

"Depressive symp" <-> Diet

"Depressive symp" <-> PA

"Depressive symp" <-> Sleep

"Education level" -> "Depressive symp"

"Education level" -> "Life Satisfaction"

"Employment status" -> "Depressive symp"

"Employment status" -> "Life Satisfaction"

"Employment status" -> Rurality

"Income concerns" -> "Depressive symp"

"Income concerns" -> "Life Satisfaction"

"Job satisfaction" -> "Depressive symp"

"Job satisfaction" -> "Life Satisfaction"

"Job stress" -> "Depressive symp"

"Job stress" -> "Life Satisfaction"

"Life Satisfaction" -> "Health S Utilisation"

"Life Satisfaction" -> Alcohol

"Neigh trust" -> "Life Satisfaction"

"Psych safety" -> "Depressive symp"

"Psych safety" -> "Job satisfaction"

"Psych safety" -> "Life Satisfaction"

"Psych safety" -> Anxiety

"Self-efficacy" -> "Depressive symp"

"Self-efficacy" -> "Life Satisfaction"

"Self-efficacy" -> Resilience

"Self-reported health" -> "Life Satisfaction"

"Sex at birth" -> "Depressive symp"

"Sex at birth" -> "Life Satisfaction"

"Social media" -> "Depressive symp"

"Social media" -> "Life Satisfaction"

"Social support" -> "Depressive symp"

"Social support" -> "Life Satisfaction"

"Work engage" -> "Depressive symp"

"Work engage" -> "Job satisfaction"

"Work engage" -> "Life Satisfaction"

"Work engage" -> Anxiety

"Workplace prep" -> "Depressive symp"

"Workplace prep" -> "Life Satisfaction"

"life events" -> "Depressive symp"

"life events" -> "Life Satisfaction"

Anxiety -> "Depressive symp"

Anxiety -> "Life Satisfaction"

Anxiety -> "Neigh trust"

BMI -> "Life Satisfaction"

BMI -> Sleep

Burnout -> "Depressive symp"

Burnout -> "Life Satisfaction"

Control -> "Depressive symp"

Control -> "Life Satisfaction"

Diet -> "Life Satisfaction"

FoC -> "Depressive symp"

FoC -> "Life Satisfaction"

Income -> "Depressive symp"

Income -> "Life Satisfaction"

Optimism -> "Depressive symp"

Optimism -> "Life Satisfaction"

Optimism -> "Neigh trust"

PA -> "Life Satisfaction"

PA -> Sleep

Profession -> "Depressive symp"

Profession -> "Life Satisfaction"

Purpose -> "Depressive symp"

Purpose -> "Life Satisfaction"

Redeployed -> "Depressive symp"

Redeployed -> "Life Satisfaction"

Resilience -> "Depressive symp"

Resilience -> "Life Satisfaction"

Rurality -> "Depressive symp"

Rurality -> "Life Satisfaction"

SOC -> "Depressive symp"

SOC -> "Life Satisfaction"

Shiftwork -> "Depressive symp"

Shiftwork -> "Life Satisfaction"

Sleep -> "Life Satisfaction"

WFH -> "Depressive symp"

WFH -> "Life Satisfaction"

}

## Anxiety symptoms and Life Satisfaction

dag {

bb="0,0,1,1"

"Age group" [pos="0.095,0.126"]

"Anxiety symptoms" [exposure,pos="0.249,0.515"]

"Compassion fatigue" [latent,pos="0.631,0.056"]

"Depressive symp" [pos="0.464,0.031"]

"Education level" [pos="0.130,0.049"]

"Employment status" [pos="0.050,0.719"]

"Health S Utilisation" [pos="0.705,0.940"]

"Income concerns" [pos="0.049,0.260"]

"Job satisfaction" [pos="0.474,0.922"]

"Job stress" [pos="0.105,0.912"]

"Life Satisfaction" [outcome,pos="0.671,0.508"]

"Neigh trust" [pos="0.296,0.059"]

"Psych safety" [pos="0.634,0.918"]

"Self-efficacy" [pos="0.908,0.073"]

"Self-reported health" [pos="0.776,0.952"]

"Sex at birth" [pos="0.033,0.587"]

"Social media" [pos="0.042,0.160"]

"Social support" [pos="0.947,0.348"]

"Work engage" [pos="0.539,0.885"]

"Workplace prep" [pos="0.391,0.930"]

"life events" [pos="0.205,0.044"]

Alcohol [pos="0.863,0.955"]

BMI [pos="0.961,0.749"]

Burnout [pos="0.562,0.039"]

Control [pos="0.960,0.229"]

Diet [pos="0.927,0.935"]

FoC [pos="0.965,0.557"]

Income [pos="0.044,0.384"]

Optimism [pos="0.744,0.021"]

PA [pos="0.963,0.661"]

Profession [pos="0.074,0.823"]

Purpose [pos="0.959,0.466"]

Redeployed [pos="0.219,0.934"]

Resilience [pos="0.824,0.045"]

Rurality [pos="0.044,0.483"]

SOC [pos="0.945,0.147"]

Shiftwork [pos="0.306,0.935"]

Sleep [pos="0.957,0.856"]

WFH [pos="0.161,0.920"]

"Age group" -> "Anxiety symptoms"

"Age group" -> "Life Satisfaction"

"Anxiety symptoms" -> "Job satisfaction"

"Anxiety symptoms" -> "Self-reported health"

"Anxiety symptoms" -> "Work engage"

"Anxiety symptoms" -> Alcohol

"Anxiety symptoms" <-> "Health S Utilisation"

"Anxiety symptoms" <-> "Job stress"

"Anxiety symptoms" <-> BMI

"Anxiety symptoms" <-> Diet

"Anxiety symptoms" <-> PA

"Anxiety symptoms" <-> Sleep

"Compassion fatigue" -> "Anxiety symptoms"

"Compassion fatigue" -> "Life Satisfaction"

"Depressive symp" -> "Anxiety symptoms"

"Depressive symp" -> "Life Satisfaction"

"Depressive symp" -> "Neigh trust"

"Education level" -> "Anxiety symptoms"

"Education level" -> "Life Satisfaction"

"Employment status" -> "Anxiety symptoms"

"Employment status" -> "Life Satisfaction"

"Employment status" -> Rurality

"Income concerns" -> "Anxiety symptoms"

"Income concerns" -> "Life Satisfaction"

"Job satisfaction" -> "Life Satisfaction"

"Job stress" -> "Life Satisfaction"

"Life Satisfaction" -> "Health S Utilisation"

"Life Satisfaction" -> Alcohol

"Neigh trust" -> "Anxiety symptoms"

"Neigh trust" -> "Life Satisfaction"

"Psych safety" -> "Anxiety symptoms"

"Psych safety" -> "Depressive symp"

"Psych safety" -> "Job satisfaction"

"Psych safety" -> "Life Satisfaction"

"Self-efficacy" -> "Anxiety symptoms"

"Self-efficacy" -> "Life Satisfaction"

"Self-efficacy" -> Resilience

"Self-reported health" -> "Life Satisfaction"

"Sex at birth" -> "Anxiety symptoms"

"Sex at birth" -> "Life Satisfaction"

"Social media" -> "Anxiety symptoms"

"Social media" -> "Life Satisfaction"

"Social support" -> "Anxiety symptoms"

"Social support" -> "Life Satisfaction"

"Work engage" -> "Depressive symp"

"Work engage" -> "Job satisfaction"

"Work engage" -> "Life Satisfaction"

"Workplace prep" -> "Anxiety symptoms"

"Workplace prep" -> "Life Satisfaction"

"life events" -> "Anxiety symptoms"

"life events" -> "Life Satisfaction"

BMI -> "Life Satisfaction"

BMI -> Sleep

Burnout -> "Anxiety symptoms"

Burnout -> "Life Satisfaction"

Control -> "Anxiety symptoms"

Control -> "Life Satisfaction"

Diet -> "Life Satisfaction"

FoC -> "Anxiety symptoms"

FoC -> "Life Satisfaction"

Income -> "Anxiety symptoms"

Income -> "Life Satisfaction"

Optimism -> "Anxiety symptoms"

Optimism -> "Life Satisfaction"

Optimism -> "Neigh trust"

PA -> "Life Satisfaction"

PA -> Sleep

Profession -> "Anxiety symptoms"

Profession -> "Life Satisfaction"

Purpose -> "Anxiety symptoms"

Purpose -> "Life Satisfaction"

Redeployed -> "Anxiety symptoms"

Redeployed -> "Life Satisfaction"

Resilience -> "Anxiety symptoms"

Resilience -> "Life Satisfaction"

Rurality -> "Anxiety symptoms"

Rurality -> "Life Satisfaction"

SOC -> "Anxiety symptoms"

SOC -> "Life Satisfaction"

Shiftwork -> "Anxiety symptoms"

Shiftwork -> "Life Satisfaction"

Sleep -> "Life Satisfaction"

WFH -> "Anxiety symptoms"

WFH -> "Life Satisfaction"

}

## Burnout and Life Satisfaction

dag {

bb="0,0,1,1"

"Age group" [pos="0.068,0.179"]

"Caring responsibilities" [pos="0.083,0.631"]

"Chronic condition" [pos="0.515,0.715"]

"Church attend" [pos="0.078,0.893"]

"Compassion fatigue" [latent,pos="0.852,0.465"]

"Confidence in IC" [pos="0.622,0.800"]

"Depressive symptoms" [pos="0.841,0.222"]

"Education level" [pos="0.356,0.037"]

"Employment status" [pos="0.078,0.425"]

"Health S Utilisation" [pos="0.893,0.089"]

"Home schooling" [pos="0.060,0.546"]

"Income concerns" [pos="0.211,0.170"]

"Job satisfaction" [pos="0.775,0.153"]

"Job stress" [pos="0.663,0.192"]

"Life Satisfaction" [outcome,pos="0.671,0.508"]

"Marital status" [pos="0.285,0.119"]

"Neigh trust" [pos="0.335,0.823"]

"Personal growth" [pos="0.956,0.674"]

"Previous MH" [pos="0.811,0.049"]

"Psych safety" [pos="0.736,0.285"]

"Relationship concerns" [pos="0.539,0.026"]

"Self-efficacy" [pos="0.433,0.087"]

"Self-reported health" [pos="0.360,0.677"]

"Sex at birth" [pos="0.070,0.050"]

"Social media" [pos="0.250,0.835"]

"Social support" [pos="0.898,0.764"]

"Work engage" [pos="0.512,0.908"]

"Workplace prep" [pos="0.583,0.940"]

"life events" [pos="0.343,0.923"]

Alcohol [pos="0.727,0.918"]

Anxiety [pos="0.686,0.039"]

BMI [pos="0.941,0.874"]

Burnout [exposure,pos="0.155,0.523"]

Control [pos="0.756,0.784"]

Dependents [pos="0.080,0.757"]

FoC [pos="0.950,0.755"]

Income [pos="0.154,0.054"]

Optimism [pos="0.912,0.565"]

PA [pos="0.664,0.918"]

PTSD [pos="0.908,0.306"]

Profession [pos="0.076,0.485"]

Purpose [pos="0.546,0.150"]

Redeployed [pos="0.432,0.931"]

Resilience [pos="0.865,0.680"]

Rurality [pos="0.039,0.308"]

SOC [pos="0.748,0.680"]

Shiftwork [pos="0.161,0.920"]

Sleep [pos="0.843,0.886"]

Smoking [pos="0.791,0.908"]

WFH [pos="0.432,0.835"]

"Age group" -> "Life Satisfaction"

"Age group" -> "Marital status"

"Age group" -> Burnout

"Caring responsibilities" -> "Life Satisfaction"

"Caring responsibilities" -> Burnout

"Chronic condition" -> "Life Satisfaction"

"Chronic condition" -> "Self-reported health"

"Church attend" -> "Life Satisfaction"

"Church attend" -> Burnout

"Compassion fatigue" -> "Life Satisfaction"

"Compassion fatigue" -> Burnout

"Confidence in IC" -> "Life Satisfaction"

"Confidence in IC" -> Burnout

"Depressive symptoms" -> "Life Satisfaction"

"Depressive symptoms" -> Burnout

"Education level" -> "Life Satisfaction"

"Education level" -> Burnout

"Education level" -> Income

"Employment status" -> "Life Satisfaction"

"Employment status" -> Burnout

"Employment status" -> Income

"Home schooling" -> "Life Satisfaction"

"Home schooling" -> Burnout

"Income concerns" -> "Life Satisfaction"

"Income concerns" -> Burnout

"Job satisfaction" -> "Life Satisfaction"

"Job satisfaction" -> Burnout

"Job stress" -> "Job satisfaction"

"Job stress" -> "Life Satisfaction"

"Job stress" -> Anxiety

"Job stress" -> Burnout

"Life Satisfaction" -> "Health S Utilisation"

"Life Satisfaction" -> Alcohol

"Life Satisfaction" -> Smoking

"Marital status" -> "Life Satisfaction"

"Marital status" -> Burnout

"Neigh trust" -> "Life Satisfaction"

"Personal growth" -> "Life Satisfaction"

"Previous MH" -> "Life Satisfaction"

"Previous MH" -> Burnout

"Psych safety" -> "Depressive symptoms"

"Psych safety" -> "Job satisfaction"

"Psych safety" -> "Life Satisfaction"

"Psych safety" -> Anxiety

"Psych safety" -> Burnout

"Psych safety" -> PTSD

"Relationship concerns" -> "Life Satisfaction"

"Self-efficacy" -> "Life Satisfaction"

"Self-efficacy" -> Burnout

"Self-efficacy" -> Resilience

"Self-reported health" -> "Life Satisfaction"

"Sex at birth" -> "Life Satisfaction"

"Sex at birth" -> Burnout

"Social media" -> "Life Satisfaction"

"Social support" -> "Life Satisfaction"

"Social support" -> Burnout

"Work engage" -> "Life Satisfaction"

"Workplace prep" -> "Life Satisfaction"

"Workplace prep" -> Burnout

"life events" -> "Life Satisfaction"

"life events" -> Burnout

Alcohol -> Smoking

Anxiety -> "Depressive symptoms"

Anxiety -> "Life Satisfaction"

Anxiety -> Burnout

BMI -> "Life Satisfaction"

BMI -> Burnout

Burnout -> "Health S Utilisation"

Burnout -> "Life Satisfaction"

Burnout -> "Neigh trust"

Burnout -> "Personal growth"

Burnout -> "Relationship concerns"

Burnout -> "Self-reported health"

Burnout -> "Social media"

Burnout -> "Work engage"

Burnout -> Alcohol

Burnout -> Optimism

Burnout -> Purpose

Burnout -> Smoking

Burnout <-> PTSD

Control -> "Life Satisfaction"

Control -> Burnout

Dependents -> "Life Satisfaction"

Dependents -> Burnout

FoC -> "Life Satisfaction"

FoC -> Burnout

Income -> "Income concerns"

Income -> "Life Satisfaction"

Income -> Burnout

Optimism -> "Life Satisfaction"

PA -> "Life Satisfaction"

PA -> Burnout

PA -> Sleep

PTSD -> "Life Satisfaction"

Profession -> "Life Satisfaction"

Profession -> Burnout

Purpose -> "Life Satisfaction"

Redeployed -> "Life Satisfaction"

Redeployed -> Burnout

Resilience -> "Life Satisfaction"

Resilience -> Burnout

Rurality -> "Life Satisfaction"

Rurality -> Burnout

SOC -> "Life Satisfaction"

SOC -> Burnout

Shiftwork -> "Life Satisfaction"

Shiftwork -> Burnout

Sleep -> "Life Satisfaction"

Sleep -> Burnout

WFH -> "Life Satisfaction"

WFH -> Burnout

}

## Compassion fatigue and Life Satisfaction

dag {

bb="0,0,1,1"

"Age group" [pos="0.095,0.126"]

"Anxiety symptoms" [pos="0.631,0.056"]

"Compassion fatigue" [exposure,pos="0.249,0.515"]

"Depressive symp" [pos="0.464,0.031"]

"Education level" [pos="0.130,0.049"]

"Employment status" [pos="0.050,0.719"]

"Health S Utilisation" [pos="0.705,0.940"]

"Income concerns" [pos="0.049,0.260"]

"Job satisfaction" [pos="0.474,0.922"]

"Job stress" [pos="0.105,0.912"]

"Life Satisfaction" [outcome,pos="0.671,0.508"]

"Neigh trust" [pos="0.296,0.059"]

"Psych safety" [pos="0.634,0.918"]

"Self-efficacy" [pos="0.908,0.073"]

"Self-reported health" [pos="0.776,0.952"]

"Sex at birth" [pos="0.033,0.587"]

"Social media" [pos="0.042,0.160"]

"Social support" [pos="0.947,0.348"]

"Work engage" [pos="0.539,0.885"]

"Workplace prep" [pos="0.391,0.930"]

"life events" [pos="0.205,0.044"]

Alcohol [pos="0.863,0.955"]

BMI [pos="0.961,0.749"]

Burnout [pos="0.562,0.039"]

Control [pos="0.960,0.229"]

Diet [pos="0.927,0.935"]

FoC [pos="0.965,0.557"]

Income [pos="0.044,0.384"]

Optimism [pos="0.744,0.021"]

PA [pos="0.963,0.661"]

Profession [pos="0.074,0.823"]

Purpose [pos="0.959,0.466"]

Redeployed [pos="0.219,0.934"]

Resilience [pos="0.824,0.045"]

Rurality [pos="0.044,0.483"]

SOC [pos="0.945,0.147"]

Shiftwork [pos="0.306,0.935"]

Sleep [pos="0.957,0.856"]

WFH [pos="0.161,0.920"]

"Age group" -> "Compassion fatigue"

"Age group" -> "Life Satisfaction"

"Anxiety symptoms" -> "Life Satisfaction"

"Compassion fatigue" -> "Anxiety symptoms"

"Compassion fatigue" -> "Depressive symp"

"Compassion fatigue" -> "Neigh trust"

"Compassion fatigue" -> "Self-reported health"

"Compassion fatigue" -> "Social media"

"Compassion fatigue" -> "Work engage"

"Compassion fatigue" -> Alcohol

"Compassion fatigue" -> Burnout

"Compassion fatigue" <-> "Health S Utilisation"

"Compassion fatigue" <-> "Job stress"

"Compassion fatigue" <-> BMI

"Depressive symp" -> "Life Satisfaction"

"Depressive symp" -> "Neigh trust"

"Education level" -> "Life Satisfaction"

"Employment status" -> "Compassion fatigue"

"Employment status" -> "Life Satisfaction"

"Employment status" -> Rurality

"Income concerns" -> "Compassion fatigue"

"Income concerns" -> "Life Satisfaction"

"Job satisfaction" -> "Compassion fatigue"

"Job satisfaction" -> "Life Satisfaction"

"Job stress" -> "Life Satisfaction"

"Life Satisfaction" -> "Health S Utilisation"

"Life Satisfaction" -> Alcohol

"Neigh trust" -> "Life Satisfaction"

"Psych safety" -> "Compassion fatigue"

"Psych safety" -> "Depressive symp"

"Psych safety" -> "Job satisfaction"

"Psych safety" -> "Life Satisfaction"

"Self-efficacy" -> "Compassion fatigue"

"Self-efficacy" -> "Life Satisfaction"

"Self-efficacy" -> Resilience

"Self-reported health" -> "Life Satisfaction"

"Sex at birth" -> "Compassion fatigue"

"Sex at birth" -> "Life Satisfaction"

"Social media" -> "Life Satisfaction"

"Social support" -> "Compassion fatigue"

"Social support" -> "Life Satisfaction"

"Work engage" -> "Depressive symp"

"Work engage" -> "Job satisfaction"

"Work engage" -> "Life Satisfaction"

"Workplace prep" -> "Compassion fatigue"

"Workplace prep" -> "Life Satisfaction"

"life events" -> "Compassion fatigue"

"life events" -> "Life Satisfaction"

BMI -> "Life Satisfaction"

BMI -> Sleep

Burnout -> "Life Satisfaction"

Control -> "Compassion fatigue"

Control -> "Life Satisfaction"

Diet -> "Compassion fatigue"

Diet -> "Life Satisfaction"

FoC -> "Compassion fatigue"

FoC -> "Life Satisfaction"

Income -> "Life Satisfaction"

Optimism -> "Compassion fatigue"

Optimism -> "Life Satisfaction"

Optimism -> "Neigh trust"

PA -> "Compassion fatigue"

PA -> "Life Satisfaction"

PA -> Sleep

Profession -> "Compassion fatigue"

Profession -> "Life Satisfaction"

Purpose -> "Compassion fatigue"

Purpose -> "Life Satisfaction"

Redeployed -> "Compassion fatigue"

Redeployed -> "Life Satisfaction"

Resilience -> "Compassion fatigue"

Resilience -> "Life Satisfaction"

Rurality -> "Compassion fatigue"

Rurality -> "Life Satisfaction"

SOC -> "Compassion fatigue"

SOC -> "Life Satisfaction"

Shiftwork -> "Compassion fatigue"

Shiftwork -> "Life Satisfaction"

Sleep -> "Compassion fatigue"

Sleep -> "Life Satisfaction"

WFH -> "Compassion fatigue"

WFH -> "Life Satisfaction"

}

## Optimism and Life Satisfaction

dag {

bb="0,0,1,1"

"Age group" [pos="0.038,0.334"]

"Childhood experiences" [latent,pos="0.928,0.516"]

"Compassion fatigue" [latent,pos="0.953,0.136"]

"Depressive symptoms" [pos="0.852,0.055"]

"Education level" [pos="0.153,0.048"]

"Employment status" [pos="0.061,0.532"]

"Health S Utilisation" [pos="0.947,0.691"]

"Income concerns" [pos="0.211,0.170"]

"Job satisfaction" [pos="0.331,0.926"]

"Job stress" [pos="0.211,0.938"]

"Life Satisfaction" [outcome,pos="0.671,0.508"]

"Neigh trust" [pos="0.282,0.050"]

"Psych safety" [pos="0.102,0.921"]

"Self-efficacy" [pos="0.454,0.043"]

"Self-reported health" [pos="0.649,0.928"]

"Sex at birth" [pos="0.047,0.219"]

"Social media" [pos="0.223,0.043"]

"Social support" [pos="0.947,0.364"]

"Work engage" [pos="0.553,0.888"]

"Workplace prep" [pos="0.483,0.938"]

"life events" [pos="0.355,0.028"]

Alcohol [pos="0.727,0.918"]

Anxiety [pos="0.743,0.029"]

BMI [pos="0.957,0.768"]

Burnout [pos="0.920,0.045"]

Control [pos="0.949,0.611"]

Diet [pos="0.887,0.949"]

FoC [pos="0.957,0.438"]

Income [pos="0.059,0.105"]

Optimism [exposure,pos="0.240,0.519"]

PA [pos="0.945,0.937"]

Profession [pos="0.047,0.621"]

Purpose [pos="0.952,0.258"]

Redeployed [pos="0.043,0.819"]

Resilience [pos="0.659,0.038"]

Rurality [pos="0.039,0.446"]

SOC [pos="0.600,0.135"]

Shiftwork [pos="0.041,0.724"]

Sleep [pos="0.927,0.843"]

Smoking [pos="0.822,0.947"]

WFH [pos="0.409,0.922"]

"Age group" -> "Life Satisfaction"

"Age group" -> Optimism

"Childhood experiences" -> "Life Satisfaction"

"Childhood experiences" -> Optimism

"Compassion fatigue" -> "Life Satisfaction"

"Depressive symptoms" -> "Life Satisfaction"

"Education level" -> "Life Satisfaction"

"Education level" -> Income

"Education level" -> Optimism

"Employment status" -> "Life Satisfaction"

"Employment status" -> Income

"Employment status" -> Optimism

"Health S Utilisation" <-> Alcohol

"Income concerns" -> "Life Satisfaction"

"Job satisfaction" -> "Life Satisfaction"

"Job stress" -> "Job satisfaction"

"Job stress" -> "Life Satisfaction"

"Job stress" -> Anxiety

"Life Satisfaction" -> "Health S Utilisation"

"Life Satisfaction" -> Alcohol

"Life Satisfaction" -> Smoking

"Neigh trust" -> "Life Satisfaction"

"Neigh trust" -> Optimism

"Psych safety" -> "Depressive symptoms"

"Psych safety" -> "Job satisfaction"

"Psych safety" -> "Life Satisfaction"

"Psych safety" -> Anxiety

"Psych safety" -> Burnout

"Psych safety" -> Optimism

"Self-efficacy" -> "Life Satisfaction"

"Self-efficacy" -> Optimism

"Self-efficacy" -> Resilience

"Self-reported health" -> "Life Satisfaction"

"Sex at birth" -> "Life Satisfaction"

"Sex at birth" -> Optimism

"Social media" -> "Life Satisfaction"

"Social media" -> Optimism

"Social support" -> "Life Satisfaction"

"Social support" -> Optimism

"Work engage" -> "Life Satisfaction"

"Workplace prep" -> "Life Satisfaction"

"life events" -> "Life Satisfaction"

"life events" -> Optimism

Alcohol -> Smoking

Anxiety -> "Depressive symptoms"

Anxiety -> "Life Satisfaction"

BMI -> "Life Satisfaction"

BMI -> Sleep

Burnout -> "Life Satisfaction"

Control -> "Life Satisfaction"

Diet -> "Life Satisfaction"

Diet -> Optimism

FoC -> "Life Satisfaction"

Income -> "Income concerns"

Income -> "Life Satisfaction"

Income -> Optimism

Optimism -> "Compassion fatigue"

Optimism -> "Depressive symptoms"

Optimism -> "Health S Utilisation"

Optimism -> "Income concerns"

Optimism -> "Job satisfaction"

Optimism -> "Job stress"

Optimism -> "Life Satisfaction"

Optimism -> "Self-reported health"

Optimism -> "Work engage"

Optimism -> Alcohol

Optimism -> Anxiety

Optimism -> BMI

Optimism -> Burnout

Optimism -> Control

Optimism -> FoC

Optimism -> Redeployed

Optimism -> Smoking

Optimism -> WFH

PA -> "Life Satisfaction"

PA -> Optimism

PA -> Sleep

Profession -> "Life Satisfaction"

Profession -> Optimism

Purpose -> "Life Satisfaction"

Redeployed -> "Life Satisfaction"

Resilience -> "Life Satisfaction"

Resilience -> Optimism

Rurality -> "Life Satisfaction"

Rurality -> Optimism

SOC -> "Life Satisfaction"

SOC -> Optimism

Shiftwork -> "Life Satisfaction"

Shiftwork -> Optimism

Sleep -> "Employment status"

Sleep -> "Life Satisfaction"

WFH -> "Life Satisfaction"

}

## Psychological resilience and Life Satisfaction

dag {

bb="0,0,1,1"

"Age group" [pos="0.045,0.386"]

"Compassion fatigue" [latent,pos="0.852,0.059"]

"Depressive symptoms" [pos="0.674,0.046"]

"Education level" [pos="0.226,0.049"]

"Employment status" [pos="0.083,0.574"]

"Health S Utilisation" [pos="0.807,0.891"]

"Income concerns" [pos="0.173,0.171"]

"Job satisfaction" [pos="0.403,0.856"]

"Job stress" [pos="0.597,0.880"]

"Life Satisfaction" [outcome,pos="0.671,0.508"]

"Neigh trust" [pos="0.937,0.166"]

"Psych Resilience" [exposure,pos="0.281,0.506"]

"Psych safety" [pos="0.501,0.898"]

"Self-efficacy" [pos="0.299,0.040"]

"Self-reported health" [pos="0.696,0.854"]

"Sex at birth" [pos="0.045,0.294"]

"Social media" [pos="0.147,0.276"]

"Social support" [pos="0.955,0.376"]

"Work engage" [pos="0.214,0.876"]

"Workplace prep" [pos="0.316,0.904"]

"life events" [pos="0.864,0.157"]

Alcohol [pos="0.866,0.845"]

Anxiety [pos="0.557,0.037"]

BMI [pos="0.957,0.570"]

Burnout [pos="0.773,0.039"]

Control [pos="0.951,0.470"]

FoC [pos="0.956,0.275"]

Income [pos="0.089,0.069"]

Mindfulness [pos="0.055,0.182"]

Optimism [pos="0.373,0.076"]

PA [pos="0.958,0.763"]

Profession [pos="0.039,0.688"]

Purpose [pos="0.487,0.039"]

Redeployed [pos="0.058,0.883"]

Rurality [pos="0.033,0.496"]

SOC [pos="0.425,0.037"]

Shiftwork [pos="0.039,0.786"]

Sleep [pos="0.967,0.673"]

Smoking [pos="0.950,0.847"]

WFH [pos="0.134,0.876"]

"Age group" -> "Life Satisfaction"

"Age group" -> "Psych Resilience"

"Compassion fatigue" -> "Life Satisfaction"

"Depressive symptoms" -> "Life Satisfaction"

"Education level" -> "Life Satisfaction"

"Education level" -> "Psych Resilience"

"Education level" -> Income

"Employment status" -> "Life Satisfaction"

"Employment status" -> "Psych Resilience"

"Employment status" -> Income

"Income concerns" -> "Life Satisfaction"

"Job satisfaction" -> "Life Satisfaction"

"Job stress" -> "Job satisfaction"

"Job stress" -> "Life Satisfaction"

"Job stress" -> "Psych Resilience"

"Job stress" -> Anxiety

"Life Satisfaction" -> "Health S Utilisation"

"Life Satisfaction" -> Alcohol

"Life Satisfaction" -> Smoking

"Neigh trust" -> "Life Satisfaction"

"Psych Resilience" -> "Compassion fatigue"

"Psych Resilience" -> "Depressive symptoms"

"Psych Resilience" -> "Health S Utilisation"

"Psych Resilience" -> "Income concerns"

"Psych Resilience" -> "Job satisfaction"

"Psych Resilience" -> "Life Satisfaction"

"Psych Resilience" -> "Neigh trust"

"Psych Resilience" -> "Self-reported health"

"Psych Resilience" -> "Social media"

"Psych Resilience" -> "Work engage"

"Psych Resilience" -> Alcohol

"Psych Resilience" -> Anxiety

"Psych Resilience" -> BMI

"Psych Resilience" -> Burnout

"Psych Resilience" -> FoC

"Psych Resilience" -> Income

"Psych Resilience" -> PA

"Psych Resilience" -> Profession

"Psych Resilience" -> Shiftwork

"Psych Resilience" -> Sleep

"Psych Resilience" -> Smoking

"Psych safety" -> "Depressive symptoms"

"Psych safety" -> "Job satisfaction"

"Psych safety" -> "Life Satisfaction"

"Psych safety" -> "Psych Resilience"

"Psych safety" -> Anxiety

"Psych safety" -> Burnout

"Self-efficacy" -> "Life Satisfaction"

"Self-efficacy" -> "Psych Resilience"

"Self-reported health" -> "Life Satisfaction"

"Sex at birth" -> "Life Satisfaction"

"Sex at birth" -> "Psych Resilience"

"Social media" -> "Life Satisfaction"

"Social support" -> "Life Satisfaction"

"Social support" -> "Psych Resilience"

"Work engage" -> "Life Satisfaction"

"Workplace prep" -> "Life Satisfaction"

"Workplace prep" -> "Psych Resilience"

"life events" -> "Life Satisfaction"

"life events" -> "Psych Resilience"

Alcohol -> Smoking

Anxiety -> "Depressive symptoms"

Anxiety -> "Life Satisfaction"

BMI -> "Life Satisfaction"

BMI -> Sleep

Burnout -> "Life Satisfaction"

Control -> "Life Satisfaction"

Control -> "Psych Resilience"

FoC -> "Life Satisfaction"

Income -> "Income concerns"

Income -> "Life Satisfaction"

Mindfulness -> "Life Satisfaction"

Mindfulness -> "Psych Resilience"

Optimism -> "Life Satisfaction"

Optimism -> "Psych Resilience"

PA -> "Life Satisfaction"

PA -> Sleep

Profession -> "Life Satisfaction"

Purpose -> "Life Satisfaction"

Redeployed -> "Life Satisfaction"

Redeployed -> "Psych Resilience"

Rurality -> "Life Satisfaction"

Rurality -> "Psych Resilience"

SOC -> "Life Satisfaction"

SOC -> "Psych Resilience"

Shiftwork -> "Life Satisfaction"

Sleep -> "Life Satisfaction"

WFH -> "Life Satisfaction"

WFH -> "Psych Resilience"

}

## Self-efficacy and Life Satisfaction

dag {

bb="0,0,1,1"

"Age group" [pos="0.095,0.126"]

"Anxiety symptoms" [pos="0.631,0.056"]

"Compassion fatigue" [latent,pos="0.908,0.073"]

"Depressive symp" [pos="0.464,0.031"]

"Education level" [pos="0.130,0.049"]

"Employment status" [pos="0.076,0.690"]

"Health S Utilisation" [pos="0.734,0.908"]

"Income concerns" [pos="0.049,0.260"]

"Job satisfaction" [pos="0.522,0.917"]

"Job stress" [pos="0.105,0.912"]

"Life Satisfaction" [outcome,pos="0.671,0.508"]

"Neigh trust" [pos="0.296,0.059"]

"Psych safety" [pos="0.641,0.851"]

"Self-efficacy" [exposure,pos="0.249,0.515"]

"Self-reported health" [pos="0.760,0.795"]

"Sex at birth" [pos="0.064,0.587"]

"Social media" [pos="0.042,0.160"]

"Social support" [pos="0.947,0.348"]

"Work engage" [pos="0.499,0.777"]

"Workplace prep" [pos="0.400,0.891"]

"life events" [pos="0.205,0.044"]

Alcohol [pos="0.847,0.906"]

BMI [pos="0.961,0.749"]

Burnout [pos="0.562,0.039"]

Control [pos="0.960,0.229"]

Diet [pos="0.909,0.896"]

FoC [pos="0.965,0.557"]

Income [pos="0.044,0.384"]

Optimism [pos="0.744,0.021"]

PA [pos="0.963,0.661"]

Profession [pos="0.074,0.823"]

Purpose [pos="0.959,0.466"]

Redeployed [pos="0.231,0.914"]

Resilience [pos="0.824,0.045"]

Rurality [pos="0.044,0.483"]

SOC [pos="0.945,0.147"]

Shiftwork [pos="0.308,0.890"]

Sleep [pos="0.957,0.856"]

WFH [pos="0.169,0.898"]

"Age group" -> "Life Satisfaction"

"Age group" -> "Self-efficacy"

"Anxiety symptoms" -> "Life Satisfaction"

"Compassion fatigue" -> "Life Satisfaction"

"Depressive symp" -> "Life Satisfaction"

"Depressive symp" -> "Neigh trust"

"Education level" -> "Life Satisfaction"

"Education level" -> "Self-efficacy"

"Employment status" -> "Life Satisfaction"

"Employment status" -> Rurality

"Health S Utilisation" <-> "Self-efficacy"

"Income concerns" -> "Life Satisfaction"

"Job satisfaction" -> "Life Satisfaction"

"Job satisfaction" -> "Self-efficacy"

"Job satisfaction" -> "Work engage"

"Job stress" -> "Life Satisfaction"

"Job stress" -> "Self-efficacy"

"Life Satisfaction" -> "Health S Utilisation"

"Life Satisfaction" -> Alcohol

"Neigh trust" -> "Life Satisfaction"

"Psych safety" -> "Depressive symp"

"Psych safety" -> "Job satisfaction"

"Psych safety" -> "Life Satisfaction"

"Psych safety" -> "Self-efficacy"

"Self-efficacy" -> "Anxiety symptoms"

"Self-efficacy" -> "Compassion fatigue"

"Self-efficacy" -> "Depressive symp"

"Self-efficacy" -> "Employment status"

"Self-efficacy" -> "Income concerns"

"Self-efficacy" -> "Neigh trust"

"Self-efficacy" -> "Self-reported health"

"Self-efficacy" -> "Social media"

"Self-efficacy" -> "Work engage"

"Self-efficacy" -> Alcohol

"Self-efficacy" -> BMI

"Self-efficacy" -> Burnout

"Self-efficacy" -> Diet

"Self-efficacy" -> Income

"Self-efficacy" -> PA

"Self-efficacy" -> Profession

"Self-efficacy" -> Sleep

"Self-reported health" -> "Life Satisfaction"

"Sex at birth" -> "Life Satisfaction"

"Sex at birth" -> "Self-efficacy"

"Social media" -> "Life Satisfaction"

"Social support" -> "Life Satisfaction"

"Social support" -> "Self-efficacy"

"Work engage" -> "Depressive symp"

"Work engage" -> "Life Satisfaction"

"Workplace prep" -> "Life Satisfaction"

"life events" -> "Life Satisfaction"

"life events" -> "Self-efficacy"

BMI -> "Life Satisfaction"

BMI -> Sleep

Burnout -> "Life Satisfaction"

Control -> "Life Satisfaction"

Control -> "Self-efficacy"

Diet -> "Life Satisfaction"

FoC -> "Life Satisfaction"

FoC -> "Self-efficacy"

Income -> "Income concerns"

Income -> "Life Satisfaction"

Optimism -> "Life Satisfaction"

Optimism -> "Neigh trust"

Optimism -> "Self-efficacy"

PA -> "Life Satisfaction"

PA -> Sleep

Profession -> "Life Satisfaction"

Purpose -> "Life Satisfaction"

Purpose -> "Self-efficacy"

Redeployed -> "Life Satisfaction"

Resilience -> "Life Satisfaction"

Resilience -> "Self-efficacy"

Rurality -> "Life Satisfaction"

SOC -> "Life Satisfaction"

SOC -> "Self-efficacy"

Shiftwork -> "Life Satisfaction"

Sleep -> "Life Satisfaction"

WFH -> "Life Satisfaction"

}

## Sense of Coherence and Life Satisfaction

dag {

bb="0,0,1,1"

"Age group" [pos="0.036,0.460"]

"Compassion fatigue" [latent,pos="0.949,0.267"]

"Depressive symptoms" [pos="0.880,0.091"]

"Education level" [pos="0.114,0.083"]

"Employment status" [pos="0.081,0.774"]

"Health S Utilisation" [pos="0.735,0.917"]

"Income concerns" [pos="0.145,0.213"]

"Job satisfaction" [pos="0.297,0.921"]

"Job stress" [pos="0.189,0.896"]

"Life Satisfaction" [outcome,pos="0.671,0.508"]

"Neigh trust" [pos="0.255,0.045"]

"Psych safety" [pos="0.346,0.780"]

"Self-efficacy" [pos="0.424,0.037"]

"Self-reported health" [pos="0.602,0.728"]

"Sex at birth" [pos="0.043,0.349"]

"Social media" [pos="0.180,0.055"]

"Social support" [pos="0.955,0.437"]

"Work engage" [pos="0.522,0.908"]

"Workplace prep" [pos="0.614,0.870"]

"life events" [pos="0.342,0.040"]

Alcohol [pos="0.875,0.913"]

Anxiety [pos="0.793,0.037"]

BMI [pos="0.961,0.622"]

Burnout [pos="0.930,0.181"]

Control [pos="0.961,0.534"]

FoC [pos="0.947,0.353"]

Income [pos="0.044,0.221"]

Optimism [pos="0.578,0.040"]

PA [pos="0.788,0.873"]

Profession [pos="0.037,0.686"]

Purpose [pos="0.502,0.066"]

Redeployed [pos="0.432,0.854"]

Resilience [pos="0.696,0.041"]

Rurality [pos="0.042,0.562"]

SOC [exposure,pos="0.266,0.507"]

Shiftwork [pos="0.054,0.872"]

Sleep [pos="0.952,0.744"]

Smoking [pos="0.947,0.827"]

WFH [pos="0.115,0.878"]

"Age group" -> "Life Satisfaction"

"Age group" -> SOC

"Compassion fatigue" -> "Life Satisfaction"

"Depressive symptoms" -> "Life Satisfaction"

"Education level" -> "Life Satisfaction"

"Education level" -> Income

"Education level" -> SOC

"Employment status" -> "Life Satisfaction"

"Income concerns" -> "Life Satisfaction"

"Job satisfaction" -> "Life Satisfaction"

"Job stress" -> "Job satisfaction"

"Job stress" -> "Life Satisfaction"

"Job stress" -> Anxiety

"Life Satisfaction" -> "Health S Utilisation"

"Life Satisfaction" -> Alcohol

"Life Satisfaction" -> Smoking

"Neigh trust" -> "Life Satisfaction"

"Psych safety" -> "Depressive symptoms"

"Psych safety" -> "Job satisfaction"

"Psych safety" -> "Life Satisfaction"

"Psych safety" -> Anxiety

"Psych safety" -> Burnout

"Psych safety" -> SOC

"Self-efficacy" -> "Life Satisfaction"

"Self-efficacy" -> Resilience

"Self-efficacy" -> SOC

"Self-reported health" -> "Life Satisfaction"

"Sex at birth" -> "Life Satisfaction"

"Sex at birth" -> SOC

"Social media" -> "Life Satisfaction"

"Social support" -> "Life Satisfaction"

"Social support" -> SOC

"Work engage" -> "Life Satisfaction"

"Workplace prep" -> "Life Satisfaction"

"life events" -> "Life Satisfaction"

"life events" -> SOC

Alcohol -> Smoking

Anxiety -> "Depressive symptoms"

Anxiety -> "Life Satisfaction"

BMI -> "Life Satisfaction"

BMI -> Sleep

Burnout -> "Life Satisfaction"

Control -> "Life Satisfaction"

FoC -> "Life Satisfaction"

Income -> "Income concerns"

Income -> "Life Satisfaction"

Income -> SOC

Optimism -> "Life Satisfaction"

PA -> "Life Satisfaction"

PA -> Sleep

Profession -> "Life Satisfaction"

Purpose -> "Life Satisfaction"

Redeployed -> "Job stress"

Redeployed -> "Life Satisfaction"

Resilience -> "Life Satisfaction"

Rurality -> "Life Satisfaction"

Rurality -> SOC

SOC -> "Compassion fatigue"

SOC -> "Depressive symptoms"

SOC -> "Employment status"

SOC -> "Health S Utilisation"

SOC -> "Income concerns"

SOC -> "Job satisfaction"

SOC -> "Job stress"

SOC -> "Life Satisfaction"

SOC -> "Neigh trust"

SOC -> "Self-reported health"

SOC -> "Social media"

SOC -> "Work engage"

SOC -> Alcohol

SOC -> Anxiety

SOC -> BMI

SOC -> Burnout

SOC -> Control

SOC -> FoC

SOC -> PA

SOC -> Profession

SOC -> Resilience

SOC -> Sleep

SOC -> Smoking

Shiftwork -> "Life Satisfaction"

Sleep -> "Life Satisfaction"

WFH -> "Life Satisfaction"

}

## Perceived control and Life Satisfaction

dag {

bb="0,0,1,1"

"Age group" [pos="0.095,0.126"]

"Anxiety symptoms" [pos="0.631,0.056"]

"Church attendance" [pos="0.068,0.734"]

"Compassion fatigue" [latent,pos="0.950,0.167"]

"Depressive symp" [pos="0.464,0.031"]

"Education level" [pos="0.130,0.049"]

"Employment status" [pos="0.067,0.634"]

"Health S Utilisation" [pos="0.735,0.886"]

"Income concerns" [pos="0.049,0.260"]

"Job satisfaction" [pos="0.490,0.901"]

"Job stress" [pos="0.105,0.912"]

"Life Satisfaction" [outcome,pos="0.671,0.508"]

"Neigh trust" [pos="0.296,0.059"]

"Perceived control" [exposure,pos="0.249,0.515"]

"Psych safety" [pos="0.634,0.918"]

"Self-efficacy" [pos="0.828,0.039"]

"Self-reported health" [pos="0.758,0.751"]

"Sex at birth" [pos="0.052,0.531"]

"Social media" [pos="0.042,0.160"]

"Social support" [pos="0.947,0.348"]

"Work engage" [pos="0.505,0.767"]

"Workplace prep" [pos="0.386,0.864"]

"life events" [pos="0.205,0.044"]

Alcohol [pos="0.834,0.908"]

BMI [pos="0.961,0.749"]

Burnout [pos="0.562,0.039"]

Diet [pos="0.908,0.911"]

FoC [pos="0.965,0.557"]

Income [pos="0.048,0.351"]

Optimism [pos="0.738,0.046"]

PA [pos="0.963,0.661"]

Profession [pos="0.051,0.834"]

Purpose [pos="0.959,0.466"]

Redeployed [pos="0.226,0.904"]

Resilience [pos="0.896,0.106"]

Rurality [pos="0.049,0.432"]

SOC [pos="0.960,0.258"]

Shiftwork [pos="0.291,0.775"]

Sleep [pos="0.957,0.856"]

WFH [pos="0.170,0.834"]

"Age group" -> "Life Satisfaction"

"Age group" -> "Perceived control"

"Anxiety symptoms" -> "Life Satisfaction"

"Church attendance" -> "Life Satisfaction"

"Church attendance" -> "Perceived control"

"Compassion fatigue" -> "Life Satisfaction"

"Depressive symp" -> "Life Satisfaction"

"Depressive symp" -> "Neigh trust"

"Education level" -> "Life Satisfaction"

"Education level" -> "Perceived control"

"Employment status" -> "Life Satisfaction"

"Employment status" -> "Perceived control"

"Employment status" -> Rurality

"Health S Utilisation" <-> "Perceived control"

"Income concerns" -> "Life Satisfaction"

"Job satisfaction" -> "Life Satisfaction"

"Job satisfaction" -> "Perceived control"

"Job stress" -> "Life Satisfaction"

"Life Satisfaction" -> "Health S Utilisation"

"Life Satisfaction" -> Alcohol

"Neigh trust" -> "Life Satisfaction"

"Perceived control" -> "Anxiety symptoms"

"Perceived control" -> "Compassion fatigue"

"Perceived control" -> "Depressive symp"

"Perceived control" -> "Income concerns"

"Perceived control" -> "Job stress"

"Perceived control" -> "Neigh trust"

"Perceived control" -> "Self-reported health"

"Perceived control" -> "Work engage"

"Perceived control" -> Alcohol

"Perceived control" -> BMI

"Perceived control" -> Burnout

"Perceived control" -> Diet

"Perceived control" -> PA

"Perceived control" -> Sleep

"Psych safety" -> "Depressive symp"

"Psych safety" -> "Job satisfaction"

"Psych safety" -> "Life Satisfaction"

"Psych safety" -> "Perceived control"

"Self-efficacy" -> "Life Satisfaction"

"Self-efficacy" -> "Perceived control"

"Self-reported health" -> "Life Satisfaction"

"Sex at birth" -> "Life Satisfaction"

"Sex at birth" -> "Perceived control"

"Social media" -> "Life Satisfaction"

"Social media" -> "Perceived control"

"Social support" -> "Life Satisfaction"

"Social support" -> "Perceived control"

"Work engage" -> "Life Satisfaction"

"Workplace prep" -> "Life Satisfaction"

"Workplace prep" -> "Perceived control"

"life events" -> "Life Satisfaction"

"life events" -> "Perceived control"

BMI -> "Life Satisfaction"

BMI -> Sleep

Burnout -> "Life Satisfaction"

Diet -> "Life Satisfaction"

FoC -> "Life Satisfaction"

FoC -> "Perceived control"

Income -> "Income concerns"

Income -> "Life Satisfaction"

Income -> "Perceived control"

Optimism -> "Life Satisfaction"

Optimism -> "Neigh trust"

Optimism -> "Perceived control"

PA -> "Life Satisfaction"

PA -> Sleep

Profession -> "Life Satisfaction"

Profession -> "Perceived control"

Purpose -> "Life Satisfaction"

Purpose -> "Perceived control"

Redeployed -> "Life Satisfaction"

Redeployed -> "Perceived control"

Resilience -> "Life Satisfaction"

Resilience -> "Perceived control"

Rurality -> "Life Satisfaction"

Rurality -> "Perceived control"

Rurality -> Income

SOC -> "Life Satisfaction"

SOC -> "Perceived control"

Shiftwork -> "Life Satisfaction"

Sleep -> "Life Satisfaction"

WFH -> "Life Satisfaction"

WFH -> "Perceived control"

}

## Social Support and Life Satisfaction

dag {

bb="0,0,1,1"

"Age group" [pos="0.095,0.126"]

"Anxiety symptoms" [pos="0.631,0.056"]

"Church attendance" [pos="0.069,0.777"]

"Compassion fatigue" [latent,pos="0.920,0.165"]

"Depressive symp" [pos="0.432,0.052"]

"Education level" [pos="0.165,0.053"]

"Employment status" [pos="0.072,0.680"]

"Health S Utilisation" [pos="0.744,0.910"]

"Income concerns" [pos="0.069,0.295"]

"Job satisfaction" [pos="0.480,0.886"]

"Job stress" [pos="0.105,0.912"]

"Life Satisfaction" [outcome,pos="0.671,0.508"]

"Marital status" [pos="0.319,0.041"]

"Neigh trust" [pos="0.336,0.162"]

"Psych safety" [pos="0.634,0.918"]

"Self-efficacy" [pos="0.828,0.039"]

"Self-reported health" [pos="0.734,0.794"]

"Sex at birth" [pos="0.065,0.582"]

"Social media" [pos="0.061,0.207"]

"Social support" [exposure,pos="0.249,0.515"]

"Work engage" [pos="0.561,0.834"]

"Workplace prep" [pos="0.388,0.830"]

"life events" [pos="0.224,0.133"]

Alcohol [pos="0.850,0.903"]

BMI [pos="0.961,0.749"]

Burnout [pos="0.539,0.043"]

Control [pos="0.967,0.371"]

Diet [pos="0.903,0.880"]

FoC [pos="0.965,0.557"]

Income [pos="0.044,0.384"]

Optimism [pos="0.732,0.044"]

PA [pos="0.963,0.661"]

Profession [pos="0.052,0.878"]

Purpose [pos="0.959,0.466"]

Redeployed [pos="0.238,0.896"]

Resilience [pos="0.927,0.076"]

Rurality [pos="0.044,0.483"]

SOC [pos="0.960,0.258"]

Shiftwork [pos="0.325,0.913"]

Sleep [pos="0.957,0.856"]

WFH [pos="0.161,0.920"]

"Age group" -> "Life Satisfaction"

"Age group" -> "Social support"

"Anxiety symptoms" -> "Life Satisfaction"

"Church attendance" -> "Life Satisfaction"

"Church attendance" -> "Social support"

"Compassion fatigue" -> "Life Satisfaction"

"Depressive symp" -> "Life Satisfaction"

"Education level" -> "Life Satisfaction"

"Education level" -> "Social support"

"Employment status" -> "Life Satisfaction"

"Employment status" -> "Social support"

"Employment status" -> Rurality

"Health S Utilisation" <-> "Social support"

"Income concerns" -> "Life Satisfaction"

"Job satisfaction" -> "Life Satisfaction"

"Job stress" -> "Life Satisfaction"

"Life Satisfaction" -> "Health S Utilisation"

"Life Satisfaction" -> Alcohol

"Marital status" -> "Life Satisfaction"

"Marital status" -> "Social support"

"Neigh trust" -> "Life Satisfaction"

"Neigh trust" -> "Social support"

"Psych safety" -> "Depressive symp"

"Psych safety" -> "Job satisfaction"

"Psych safety" -> "Life Satisfaction"

"Psych safety" -> "Social support"

"Self-efficacy" -> "Life Satisfaction"

"Self-efficacy" -> "Social support"

"Self-reported health" -> "Life Satisfaction"

"Sex at birth" -> "Life Satisfaction"

"Sex at birth" -> "Social support"

"Social media" -> "Life Satisfaction"

"Social media" -> "Social support"

"Social support" -> "Anxiety symptoms"

"Social support" -> "Compassion fatigue"

"Social support" -> "Depressive symp"

"Social support" -> "Job stress"

"Social support" -> "Self-reported health"

"Social support" -> "Workplace prep"

"Social support" -> Alcohol

"Social support" -> BMI

"Social support" -> Burnout

"Social support" -> Control

"Social support" -> Diet

"Social support" -> FoC

"Social support" -> Optimism

"Social support" -> PA

"Social support" -> Purpose

"Social support" -> Sleep

"Work engage" -> "Depressive symp"

"Work engage" -> "Life Satisfaction"

"Work engage" -> "Social support"

"Workplace prep" -> "Life Satisfaction"

"life events" -> "Life Satisfaction"

"life events" -> "Social support"

BMI -> "Life Satisfaction"

BMI -> Sleep

Burnout -> "Life Satisfaction"

Control -> "Life Satisfaction"

Diet -> "Life Satisfaction"

FoC -> "Life Satisfaction"

Income -> "Income concerns"

Income -> "Life Satisfaction"

Income -> "Social support"

Optimism -> "Life Satisfaction"

PA -> "Life Satisfaction"

PA -> Sleep

Profession -> "Life Satisfaction"

Profession -> "Social support"

Purpose -> "Life Satisfaction"

Redeployed -> "Life Satisfaction"

Redeployed -> "Social support"

Resilience -> "Life Satisfaction"

Resilience -> "Social support"

Rurality -> "Life Satisfaction"

Rurality -> "Social support"

SOC -> "Life Satisfaction"

SOC -> "Social support"

Shiftwork -> "Life Satisfaction"

Shiftwork -> "Social support"

Sleep -> "Life Satisfaction"

WFH -> "Life Satisfaction"

WFH -> "Social support"

}

## Purpose and Life Satisfaction

dag {

bb="0,0,1,1"

"Age group" [pos="0.115,0.142"]

"Anxiety symptoms" [pos="0.640,0.102"]

"Church attendance" [pos="0.082,0.774"]

"Compassion fatigue" [latent,pos="0.918,0.203"]

"Depressive symp" [pos="0.464,0.031"]

"Education level" [pos="0.130,0.049"]

"Employment status" [pos="0.082,0.677"]

"Health S Utilisation" [pos="0.734,0.897"]

"Income concerns" [pos="0.072,0.296"]

"Job satisfaction" [pos="0.474,0.922"]

"Job stress" [pos="0.139,0.918"]

"Life Satisfaction" [outcome,pos="0.671,0.508"]

"Marital status" [pos="0.324,0.052"]

"Neigh trust" [pos="0.250,0.193"]

"Psych safety" [pos="0.634,0.918"]

"Self-efficacy" [pos="0.828,0.039"]

"Self-reported health" [pos="0.761,0.765"]

"Sex at birth" [pos="0.060,0.575"]

"Social media" [pos="0.053,0.190"]

"Social support" [pos="0.951,0.461"]

"Work engage" [pos="0.554,0.843"]

"Workplace prep" [pos="0.390,0.873"]

"life events" [pos="0.218,0.082"]

Alcohol [pos="0.842,0.900"]

BMI [pos="0.961,0.749"]

Burnout [pos="0.589,0.034"]

Control [pos="0.967,0.371"]

Diet [pos="0.908,0.887"]

FoC [pos="0.965,0.557"]

Income [pos="0.044,0.384"]

Optimism [pos="0.742,0.057"]

PA [pos="0.963,0.661"]

Profession [pos="0.078,0.878"]

Purpose [exposure,pos="0.249,0.515"]

Redeployed [pos="0.223,0.834"]

Resilience [pos="0.896,0.106"]

Rurality [pos="0.044,0.483"]

SOC [pos="0.923,0.280"]

Shiftwork [pos="0.299,0.845"]

Sleep [pos="0.957,0.856"]

WFH [pos="0.208,0.917"]

"Age group" -> "Life Satisfaction"

"Age group" -> Purpose

"Anxiety symptoms" -> "Life Satisfaction"

"Church attendance" -> "Life Satisfaction"

"Church attendance" -> Purpose

"Compassion fatigue" -> "Life Satisfaction"

"Depressive symp" -> "Life Satisfaction"

"Education level" -> "Life Satisfaction"

"Education level" -> Purpose

"Employment status" -> "Life Satisfaction"

"Employment status" -> Rurality

"Health S Utilisation" <-> Purpose

"Income concerns" -> "Life Satisfaction"

"Job satisfaction" -> "Life Satisfaction"

"Job stress" -> "Life Satisfaction"

"Job stress" -> Purpose

"Life Satisfaction" -> "Health S Utilisation"

"Life Satisfaction" -> Alcohol

"Marital status" -> "Life Satisfaction"

"Neigh trust" -> "Life Satisfaction"

"Psych safety" -> "Depressive symp"

"Psych safety" -> "Job satisfaction"

"Psych safety" -> "Life Satisfaction"

"Self-efficacy" -> "Life Satisfaction"

"Self-reported health" -> "Life Satisfaction"

"Self-reported health" -> Purpose

"Sex at birth" -> "Life Satisfaction"

"Sex at birth" -> Purpose

"Social media" -> "Life Satisfaction"

"Social support" -> "Life Satisfaction"

"Social support" -> Purpose

"Work engage" -> "Depressive symp"

"Work engage" -> "Life Satisfaction"

"Workplace prep" -> "Life Satisfaction"

"life events" -> "Life Satisfaction"

BMI -> "Life Satisfaction"

BMI -> Sleep

Burnout -> "Life Satisfaction"

Control -> "Life Satisfaction"

Diet -> "Life Satisfaction"

FoC -> "Life Satisfaction"

Income -> "Income concerns"

Income -> "Life Satisfaction"

Optimism -> "Life Satisfaction"

PA -> "Life Satisfaction"

PA -> Sleep

Profession -> "Life Satisfaction"

Profession -> Purpose

Purpose -> "Anxiety symptoms"

Purpose -> "Compassion fatigue"

Purpose -> "Depressive symp"

Purpose -> "Employment status"

Purpose -> "Marital status"

Purpose -> "Self-efficacy"

Purpose -> "Work engage"

Purpose -> Alcohol

Purpose -> BMI

Purpose -> Burnout

Purpose -> Control

Purpose -> Diet

Purpose -> FoC

Purpose -> Income

Purpose -> Optimism

Purpose -> PA

Purpose -> Resilience

Purpose -> Rurality

Purpose -> Sleep

Redeployed -> "Life Satisfaction"

Resilience -> "Life Satisfaction"

Rurality -> "Life Satisfaction"

SOC -> "Life Satisfaction"

SOC -> Purpose

Shiftwork -> "Life Satisfaction"

Sleep -> "Life Satisfaction"

WFH -> "Life Satisfaction"

}

## Sense of Coherence (SOC)

dag {

bb="0,0,1,1"

"Age group" [pos="0.045,0.386"]

"Compassion fatigue" [latent,pos="0.852,0.059"]

"Depressive symptoms" [pos="0.674,0.046"]

"Education level" [pos="0.226,0.049"]

"Employment status" [pos="0.073,0.546"]

"Health S Utilisation" [pos="0.807,0.891"]

"Income concerns" [pos="0.173,0.171"]

"Job satisfaction" [pos="0.403,0.856"]

"Job stress" [pos="0.597,0.880"]

"Life satisfaction" [outcome,pos="0.576,0.541"]

"Neigh trust" [pos="0.937,0.166"]

"Psych resilience" [pos="0.045,0.631"]

"Psych safety" [pos="0.501,0.898"]

"Self-efficacy" [pos="0.299,0.040"]

"Self-reported health" [pos="0.696,0.854"]

"Sex at birth" [pos="0.045,0.294"]

"Social media" [pos="0.147,0.276"]

"Social support" [pos="0.955,0.376"]

"Work engage" [pos="0.214,0.876"]

"Workplace prep" [pos="0.316,0.904"]

"life events" [pos="0.864,0.157"]

Alcohol [pos="0.866,0.845"]

Anxiety [pos="0.557,0.037"]

BMI [pos="0.957,0.570"]

Burnout [pos="0.773,0.039"]

Control [pos="0.951,0.470"]

FoC [pos="0.956,0.275"]

Income [pos="0.089,0.069"]

Mindfulness [pos="0.055,0.182"]

Optimism [pos="0.373,0.076"]

PA [pos="0.958,0.763"]

Profession [pos="0.050,0.706"]

Purpose [pos="0.487,0.039"]

Redeployed [pos="0.058,0.883"]

Rurality [pos="0.033,0.496"]

SOC [exposure,pos="0.325,0.552"]

Shiftwork [pos="0.039,0.786"]

Sleep [pos="0.967,0.673"]

Smoking [pos="0.950,0.847"]

WFH [pos="0.134,0.876"]

"Age group" -> "Life satisfaction"

"Age group" -> SOC

"Depressive symptoms" -> "Life satisfaction"

"Education level" -> "Life satisfaction"

"Education level" -> Income

"Education level" -> SOC

"Employment status" -> "Life satisfaction"

"Health S Utilisation" -> "Life satisfaction"

"Income concerns" -> "Life satisfaction"

"Job satisfaction" -> "Life satisfaction"

"Job stress" -> "Life satisfaction"

"Psych resilience" -> "Life satisfaction"

"Psych safety" -> "Life satisfaction"

"Self-efficacy" -> "Life satisfaction"

"Self-reported health" -> "Life satisfaction"

"Sex at birth" -> "Life satisfaction"

"Sex at birth" -> SOC

"Social support" -> "Life satisfaction"

"Social support" -> SOC

"Work engage" -> "Life satisfaction"

"Workplace prep" -> "Life satisfaction"

"life events" -> "Life satisfaction"

"life events" -> SOC

Alcohol -> "Life satisfaction"

Alcohol -> "Self-reported health"

Anxiety -> "Life satisfaction"

BMI -> "Life satisfaction"

Burnout -> "Life satisfaction"

Control -> "Life satisfaction"

FoC -> "Life satisfaction"

Income -> "Life satisfaction"

Income -> SOC

Optimism -> "Life satisfaction"

PA -> "Life satisfaction"

PA -> Sleep

PA -> Smoking

Profession -> "Life satisfaction"

Purpose -> "Life satisfaction"

Redeployed -> "Life satisfaction"

Rurality -> "Life satisfaction"

SOC -> "Depressive symptoms"

SOC -> "Income concerns"

SOC -> "Job satisfaction"

SOC -> "Job stress"

SOC -> "Life satisfaction"

SOC -> "Psych resilience"

SOC -> "Psych safety"

SOC -> "Self-efficacy"

SOC -> "Self-reported health"

SOC -> "Work engage"

SOC -> "Workplace prep"

SOC -> Anxiety

SOC -> Burnout

SOC -> Control

SOC -> FoC

SOC -> Optimism

SOC -> Profession

SOC -> Purpose

Shiftwork -> "Life satisfaction"

Sleep -> "Life satisfaction"

Smoking -> "Life satisfaction"

WFH -> "Life satisfaction"

}

# Concerns about COVID-19

## Fear of COVID

dag {

bb="0,0,1,1"

"Age group" [pos="0.141,0.170"]

"Anxiety symptoms" [pos="0.631,0.056"]

"Caring resp" [pos="0.194,0.796"]

"Church attendance" [pos="0.068,0.787"]

"Compassion fatigue" [latent,pos="0.950,0.167"]

"Depressive symp" [pos="0.446,0.073"]

"Education level" [pos="0.107,0.079"]

"Employment status" [pos="0.068,0.662"]

"Fear of COVID" [exposure,pos="0.249,0.515"]

"Health S Utilisation" [pos="0.732,0.886"]

"Income concerns" [pos="0.068,0.240"]

"Job satisfaction" [pos="0.474,0.922"]

"Job stress" [pos="0.105,0.912"]

"Life Satisfaction" [outcome,pos="0.671,0.508"]

"Marital status" [pos="0.252,0.047"]

"Neigh trust" [pos="0.344,0.090"]

"Psych safety" [pos="0.634,0.918"]

"Self-efficacy" [pos="0.820,0.059"]

"Self-reported health" [pos="0.746,0.742"]

"Sex at birth" [pos="0.047,0.545"]

"Social media" [pos="0.055,0.152"]

"Social support" [pos="0.951,0.461"]

"Work engage" [pos="0.539,0.885"]

"Workplace prep" [pos="0.358,0.824"]

"life events" [pos="0.177,0.033"]

Alcohol [pos="0.835,0.888"]

BMI [pos="0.961,0.749"]

Burnout [pos="0.525,0.039"]

Control [pos="0.967,0.371"]

Dependents [pos="0.179,0.647"]

Diet [pos="0.908,0.891"]

Income [pos="0.051,0.342"]

Optimism [pos="0.734,0.084"]

PA [pos="0.963,0.661"]

Profession [pos="0.045,0.889"]

Purpose [pos="0.965,0.557"]

Redeployed [pos="0.258,0.900"]

Resilience [pos="0.896,0.106"]

Rurality [pos="0.064,0.439"]

SOC [pos="0.960,0.258"]

Shiftwork [pos="0.353,0.926"]

Sleep [pos="0.957,0.856"]

WFH [pos="0.184,0.917"]

"Age group" -> "Fear of COVID"

"Age group" -> "Life Satisfaction"

"Anxiety symptoms" -> "Life Satisfaction"

"Anxiety symptoms" -> Burnout

"Caring resp" -> "Fear of COVID"

"Caring resp" -> "Life Satisfaction"

"Church attendance" -> "Fear of COVID"

"Church attendance" -> "Life Satisfaction"

"Compassion fatigue" -> "Life Satisfaction"

"Depressive symp" -> "Life Satisfaction"

"Depressive symp" -> Burnout

"Education level" -> "Fear of COVID"

"Education level" -> "Life Satisfaction"

"Employment status" -> "Fear of COVID"

"Employment status" -> "Life Satisfaction"

"Employment status" -> Rurality

"Fear of COVID" -> "Anxiety symptoms"

"Fear of COVID" -> "Compassion fatigue"

"Fear of COVID" -> "Depressive symp"

"Fear of COVID" -> "Income concerns"

"Fear of COVID" -> "Job satisfaction"

"Fear of COVID" -> "Job stress"

"Fear of COVID" -> "Neigh trust"

"Fear of COVID" -> "Self-reported health"

"Fear of COVID" -> "Social support"

"Fear of COVID" -> "Work engage"

"Fear of COVID" -> Alcohol

"Fear of COVID" -> BMI

"Fear of COVID" -> Burnout

"Fear of COVID" -> Control

"Fear of COVID" -> Diet

"Fear of COVID" -> Income

"Fear of COVID" -> PA

"Fear of COVID" -> Purpose

"Fear of COVID" -> Sleep

"Fear of COVID" -> WFH

"Fear of COVID" <-> "Health S Utilisation"

"Income concerns" -> "Life Satisfaction"

"Job satisfaction" -> "Life Satisfaction"

"Job stress" -> "Life Satisfaction"

"Life Satisfaction" -> "Health S Utilisation"

"Life Satisfaction" -> Alcohol

"Marital status" -> "Fear of COVID"

"Marital status" -> "Life Satisfaction"

"Neigh trust" -> "Life Satisfaction"

"Psych safety" -> "Depressive symp"

"Psych safety" -> "Fear of COVID"

"Psych safety" -> "Job satisfaction"

"Psych safety" -> "Life Satisfaction"

"Self-efficacy" -> "Fear of COVID"

"Self-efficacy" -> "Life Satisfaction"

"Self-reported health" -> "Life Satisfaction"

"Sex at birth" -> "Fear of COVID"

"Sex at birth" -> "Life Satisfaction"

"Social media" -> "Fear of COVID"

"Social media" -> "Life Satisfaction"

"Social support" -> "Life Satisfaction"

"Work engage" -> "Depressive symp"

"Work engage" -> "Job satisfaction"

"Work engage" -> "Life Satisfaction"

"Workplace prep" -> "Fear of COVID"

"Workplace prep" -> "Life Satisfaction"

"life events" -> "Fear of COVID"

"life events" -> "Life Satisfaction"

BMI -> "Life Satisfaction"

BMI -> Sleep

Burnout -> "Life Satisfaction"

Control -> "Life Satisfaction"

Dependents -> "Fear of COVID"

Dependents -> "Life Satisfaction"

Diet -> "Life Satisfaction"

Income -> "Income concerns"

Income -> "Life Satisfaction"

Optimism -> "Fear of COVID"

Optimism -> "Life Satisfaction"

PA -> "Life Satisfaction"

PA -> Sleep

Profession -> "Fear of COVID"

Profession -> "Life Satisfaction"

Purpose -> "Life Satisfaction"

Redeployed -> "Fear of COVID"

Redeployed -> "Life Satisfaction"

Resilience -> "Fear of COVID"

Resilience -> "Life Satisfaction"

Rurality -> "Fear of COVID"

Rurality -> "Life Satisfaction"

SOC -> "Fear of COVID"

SOC -> "Life Satisfaction"

Shiftwork -> "Life Satisfaction"

Sleep -> "Life Satisfaction"

WFH -> "Life Satisfaction"

}

# Lifestyle factors

## Physical activity

dag {

bb="0,0,1,1"

"Age group" [pos="0.095,0.126"]

"Anxiety symptoms" [pos="0.632,0.074"]

"Caring resp" [pos="0.194,0.796"]

"Church attendance" [pos="0.065,0.794"]

"Compassion fatigue" [latent,pos="0.950,0.167"]

"Depressive symp" [pos="0.464,0.031"]

"Education level" [pos="0.130,0.049"]

"Employment status" [pos="0.072,0.694"]

"Fear COVID" [pos="0.963,0.661"]

"Health S Utilisation" [pos="0.743,0.898"]

"Income concerns" [pos="0.079,0.289"]

"Job satisfaction" [pos="0.444,0.828"]

"Job stress" [pos="0.105,0.912"]

"Life Satisfaction" [outcome,pos="0.671,0.508"]

"Marital status" [pos="0.279,0.044"]

"Neigh trust" [pos="0.350,0.104"]

"Phys activity" [exposure,pos="0.249,0.515"]

"Psych safety" [pos="0.634,0.918"]

"Self-efficacy" [pos="0.828,0.039"]

"Self-reported health" [pos="0.734,0.761"]

"Sex at birth" [pos="0.076,0.581"]

"Social media" [pos="0.053,0.190"]

"Social support" [pos="0.951,0.461"]

"Work engage" [pos="0.539,0.885"]

"Workplace prep" [pos="0.426,0.913"]

"life events" [pos="0.190,0.036"]

Alcohol [pos="0.828,0.864"]

BMI [pos="0.940,0.760"]

Burnout [pos="0.562,0.039"]

Control [pos="0.967,0.371"]

Dependents [pos="0.144,0.644"]

Diet [pos="0.906,0.890"]

Income [pos="0.044,0.384"]

Optimism [pos="0.734,0.040"]

Profession [pos="0.045,0.889"]

Purpose [pos="0.965,0.557"]

Redeployed [pos="0.240,0.919"]

Resilience [pos="0.896,0.106"]

Rurality [pos="0.044,0.483"]

SOC [pos="0.960,0.258"]

Shiftwork [pos="0.328,0.866"]

Sleep [pos="0.957,0.856"]

WFH [pos="0.161,0.920"]

"Age group" -> "Life Satisfaction"

"Age group" -> "Phys activity"

"Anxiety symptoms" -> "Life Satisfaction"

"Anxiety symptoms" -> "Phys activity"

"Anxiety symptoms" -> Burnout

"Caring resp" -> "Life Satisfaction"

"Caring resp" -> "Phys activity"

"Church attendance" -> "Life Satisfaction"

"Church attendance" -> "Phys activity"

"Compassion fatigue" -> "Life Satisfaction"

"Depressive symp" -> "Life Satisfaction"

"Depressive symp" -> "Phys activity"

"Depressive symp" -> Burnout

"Education level" -> "Life Satisfaction"

"Education level" -> "Phys activity"

"Employment status" -> "Life Satisfaction"

"Employment status" -> "Phys activity"

"Employment status" -> Rurality

"Fear COVID" -> "Life Satisfaction"

"Fear COVID" <-> "Phys activity"

"Health S Utilisation" <-> "Phys activity"

"Income concerns" -> "Life Satisfaction"

"Job satisfaction" -> "Life Satisfaction"

"Job stress" -> "Life Satisfaction"

"Job stress" -> "Phys activity"

"Life Satisfaction" -> "Health S Utilisation"

"Life Satisfaction" -> Alcohol

"Marital status" -> "Life Satisfaction"

"Marital status" -> "Phys activity"

"Neigh trust" -> "Life Satisfaction"

"Neigh trust" -> "Phys activity"

"Phys activity" -> "Compassion fatigue"

"Phys activity" -> "Income concerns"

"Phys activity" -> "Job satisfaction"

"Phys activity" -> "Work engage"

"Phys activity" -> Alcohol

"Phys activity" -> Control

"Phys activity" -> Purpose

"Phys activity" <-> Diet

"Psych safety" -> "Depressive symp"

"Psych safety" -> "Job satisfaction"

"Psych safety" -> "Life Satisfaction"

"Psych safety" -> "Phys activity"

"Self-efficacy" -> "Life Satisfaction"

"Self-efficacy" -> "Phys activity"

"Self-reported health" -> "Life Satisfaction"

"Self-reported health" -> "Phys activity"

"Sex at birth" -> "Life Satisfaction"

"Sex at birth" -> "Phys activity"

"Social media" -> "Life Satisfaction"

"Social media" -> "Phys activity"

"Social support" -> "Life Satisfaction"

"Social support" -> "Phys activity"

"Work engage" -> "Job satisfaction"

"Work engage" -> "Life Satisfaction"

"Workplace prep" -> "Life Satisfaction"

"life events" -> "Life Satisfaction"

"life events" -> "Phys activity"

BMI -> "Life Satisfaction"

Burnout -> "Life Satisfaction"

Burnout -> "Phys activity"

Control -> "Life Satisfaction"

Dependents -> "Life Satisfaction"

Dependents -> "Phys activity"

Diet -> "Life Satisfaction"

Income -> "Income concerns"

Income -> "Life Satisfaction"

Income -> "Phys activity"

Income -> BMI

Optimism -> "Life Satisfaction"

Optimism -> "Phys activity"

Profession -> "Life Satisfaction"

Profession -> "Phys activity"

Purpose -> "Life Satisfaction"

Redeployed -> "Life Satisfaction"

Redeployed -> "Phys activity"

Resilience -> "Life Satisfaction"

Resilience -> "Phys activity"

Rurality -> "Life Satisfaction"

Rurality -> "Phys activity"

SOC -> "Life Satisfaction"

SOC -> "Phys activity"

Shiftwork -> "Life Satisfaction"

Shiftwork -> "Phys activity"

Sleep -> "Life Satisfaction"

Sleep -> "Phys activity"

WFH -> "Life Satisfaction"

WFH -> "Phys activity"

}

## Alcohol consumption

dag {

bb="0,0,1,1"

"Age group" [pos="0.095,0.126"]

"Alcohol Consump" [exposure,pos="0.259,0.548"]

"Anxiety symptoms" [pos="0.609,0.044"]

"Caring resp" [pos="0.194,0.796"]

"Church attendance" [pos="0.095,0.798"]

"Compassion fatigue" [latent,pos="0.950,0.167"]

"Depressive symp" [pos="0.410,0.043"]

"Education level" [pos="0.130,0.049"]

"Employment status" [pos="0.083,0.714"]

"Fear COVID" [pos="0.914,0.639"]

"Health S Utilisation" [pos="0.757,0.894"]

"Income concerns" [pos="0.078,0.279"]

"Job satisfaction" [pos="0.474,0.922"]

"Job stress" [pos="0.105,0.912"]

"Life Satisfaction" [outcome,pos="0.671,0.508"]

"Marital status" [pos="0.240,0.176"]

"Neigh trust" [pos="0.296,0.059"]

"Psych safety" [pos="0.634,0.918"]

"Self-efficacy" [pos="0.828,0.039"]

"Self-reported health" [pos="0.734,0.751"]

"Sex at birth" [pos="0.074,0.585"]

"Social media" [pos="0.053,0.190"]

"Social support" [pos="0.951,0.461"]

"Work engage" [pos="0.539,0.885"]

"Workplace prep" [pos="0.380,0.854"]

"life events" [pos="0.190,0.036"]

BMI [pos="0.961,0.749"]

Burnout [pos="0.510,0.040"]

Control [pos="0.967,0.371"]

Dependents [pos="0.168,0.645"]

Diet [pos="0.912,0.901"]

Income [pos="0.044,0.384"]

Optimism [pos="0.734,0.039"]

PA [pos="0.830,0.858"]

Profession [pos="0.045,0.889"]

Purpose [pos="0.965,0.557"]

Redeployed [pos="0.270,0.900"]

Resilience [pos="0.896,0.106"]

Rurality [pos="0.044,0.483"]

SOC [pos="0.960,0.258"]

Shiftwork [pos="0.298,0.820"]

Sleep [pos="0.957,0.856"]

WFH [pos="0.194,0.914"]

"Age group" -> "Alcohol Consump"

"Age group" -> "Life Satisfaction"

"Alcohol Consump" -> "Self-reported health"

"Alcohol Consump" -> "Social media"

"Alcohol Consump" -> BMI

"Alcohol Consump" -> Diet

"Alcohol Consump" -> PA

"Alcohol Consump" -> Sleep

"Alcohol Consump" <-> "Health S Utilisation"

"Anxiety symptoms" -> "Alcohol Consump"

"Anxiety symptoms" -> "Life Satisfaction"

"Caring resp" -> "Alcohol Consump"

"Caring resp" -> "Life Satisfaction"

"Church attendance" -> "Alcohol Consump"

"Church attendance" -> "Life Satisfaction"

"Compassion fatigue" -> "Life Satisfaction"

"Depressive symp" -> "Alcohol Consump"

"Depressive symp" -> "Life Satisfaction"

"Education level" -> "Alcohol Consump"

"Education level" -> "Life Satisfaction"

"Employment status" -> "Alcohol Consump"

"Employment status" -> "Life Satisfaction"

"Employment status" -> Rurality

"Fear COVID" -> "Alcohol Consump"

"Fear COVID" -> "Life Satisfaction"

"Fear COVID" -> Sleep

"Income concerns" -> "Alcohol Consump"

"Income concerns" -> "Life Satisfaction"

"Job satisfaction" -> "Alcohol Consump"

"Job satisfaction" -> "Life Satisfaction"

"Job stress" -> "Alcohol Consump"

"Job stress" -> "Life Satisfaction"

"Life Satisfaction" -> "Health S Utilisation"

"Marital status" -> "Alcohol Consump"

"Marital status" -> "Life Satisfaction"

"Neigh trust" -> "Life Satisfaction"

"Psych safety" -> "Alcohol Consump"

"Psych safety" -> "Depressive symp"

"Psych safety" -> "Job satisfaction"

"Psych safety" -> "Life Satisfaction"

"Self-efficacy" -> "Alcohol Consump"

"Self-efficacy" -> "Life Satisfaction"

"Self-reported health" -> "Life Satisfaction"

"Sex at birth" -> "Alcohol Consump"

"Sex at birth" -> "Life Satisfaction"

"Social media" -> "Life Satisfaction"

"Social support" -> "Alcohol Consump"

"Social support" -> "Life Satisfaction"

"Work engage" -> "Alcohol Consump"

"Work engage" -> "Job satisfaction"

"Work engage" -> "Life Satisfaction"

"Workplace prep" -> "Alcohol Consump"

"Workplace prep" -> "Life Satisfaction"

"life events" -> "Alcohol Consump"

"life events" -> "Life Satisfaction"

BMI -> "Life Satisfaction"

BMI -> Sleep

Burnout -> "Alcohol Consump"

Burnout -> "Life Satisfaction"

Control -> "Alcohol Consump"

Control -> "Life Satisfaction"

Dependents -> "Alcohol Consump"

Dependents -> "Life Satisfaction"

Diet -> "Life Satisfaction"

Income -> "Alcohol Consump"

Income -> "Income concerns"

Income -> "Life Satisfaction"

Income -> BMI

Optimism -> "Alcohol Consump"

Optimism -> "Life Satisfaction"

PA -> "Life Satisfaction"

Profession -> "Alcohol Consump"

Profession -> "Life Satisfaction"

Purpose -> "Alcohol Consump"

Purpose -> "Life Satisfaction"

Redeployed -> "Alcohol Consump"

Redeployed -> "Life Satisfaction"

Resilience -> "Alcohol Consump"

Resilience -> "Life Satisfaction"

Rurality -> "Alcohol Consump"

Rurality -> "Life Satisfaction"

SOC -> "Alcohol Consump"

SOC -> "Life Satisfaction"

Shiftwork -> "Alcohol Consump"

Shiftwork -> "Life Satisfaction"

Sleep -> "Life Satisfaction"

WFH -> "Alcohol Consump"

WFH -> "Life Satisfaction"

}

## Body Mass Index

dag {

bb="0,0,1,1"

"Age group" [pos="0.118,0.143"]

"Anxiety symptoms" [pos="0.587,0.041"]

"Caring resp" [pos="0.194,0.796"]

"Compassion fatigue" [latent,pos="0.939,0.131"]

"Depressive symp" [pos="0.379,0.053"]

"Education level" [pos="0.130,0.049"]

"Employment status" [pos="0.076,0.778"]

"Fear COVID" [pos="0.963,0.661"]

"Health S Utilisation" [pos="0.732,0.891"]

"Income concerns" [pos="0.081,0.286"]

"Job satisfaction" [pos="0.475,0.913"]

"Job stress" [pos="0.105,0.912"]

"Life Satisfaction" [outcome,pos="0.671,0.508"]

"Life events" [pos="0.225,0.033"]

"Neigh trust" [pos="0.277,0.114"]

"Psych safety" [pos="0.634,0.918"]

"Self-efficacy" [pos="0.770,0.047"]

"Self-reported health" [pos="0.742,0.731"]

"Sex at birth" [pos="0.068,0.581"]

"Social media" [pos="0.044,0.180"]

"Social support" [pos="0.951,0.461"]

"Work engage" [pos="0.525,0.823"]

"Workplace prep" [pos="0.391,0.871"]

Alcohol [pos="0.961,0.749"]

BMI [exposure,pos="0.259,0.548"]

Burnout [pos="0.492,0.040"]

Control [pos="0.970,0.315"]

Dependents [pos="0.045,0.685"]

Diet [pos="0.900,0.880"]

Income [pos="0.044,0.384"]

Optimism [pos="0.690,0.037"]

PA [pos="0.844,0.896"]

Profession [pos="0.045,0.870"]

Purpose [pos="0.965,0.557"]

Redeployed [pos="0.240,0.919"]

Resilience [pos="0.864,0.053"]

Rurality [pos="0.044,0.483"]

SOC [pos="0.964,0.214"]

Shiftwork [pos="0.312,0.843"]

Sleep [pos="0.957,0.856"]

WFH [pos="0.161,0.920"]

"Age group" -> "Life Satisfaction"

"Age group" -> BMI

"Anxiety symptoms" -> "Life Satisfaction"

"Anxiety symptoms" -> BMI

"Caring resp" -> "Life Satisfaction"

"Caring resp" -> BMI

"Compassion fatigue" -> "Life Satisfaction"

"Depressive symp" -> "Life Satisfaction"

"Depressive symp" -> BMI

"Education level" -> "Life Satisfaction"

"Education level" -> BMI

"Employment status" -> "Life Satisfaction"

"Employment status" -> BMI

"Employment status" -> Rurality

"Fear COVID" -> "Life Satisfaction"

"Health S Utilisation" <-> BMI

"Income concerns" -> "Life Satisfaction"

"Income concerns" -> BMI

"Job satisfaction" -> "Life Satisfaction"

"Job satisfaction" -> BMI

"Job stress" -> "Life Satisfaction"

"Job stress" -> BMI

"Life Satisfaction" -> "Health S Utilisation"

"Life events" -> "Life Satisfaction"

"Life events" -> BMI

"Neigh trust" -> "Life Satisfaction"

"Psych safety" -> "Depressive symp"

"Psych safety" -> "Job satisfaction"

"Psych safety" -> "Life Satisfaction"

"Psych safety" -> BMI

"Self-efficacy" -> "Life Satisfaction"

"Self-efficacy" -> BMI

"Self-reported health" -> "Life Satisfaction"

"Sex at birth" -> "Life Satisfaction"

"Sex at birth" -> BMI

"Social media" -> "Life Satisfaction"

"Social support" -> "Life Satisfaction"

"Social support" -> BMI

"Work engage" -> "Life Satisfaction"

"Workplace prep" -> "Life Satisfaction"

Alcohol -> "Life Satisfaction"

BMI -> "Self-reported health"

BMI -> "Social media"

BMI -> "Work engage"

BMI -> Alcohol

BMI -> Sleep

Burnout -> "Life Satisfaction"

Burnout -> BMI

Control -> "Life Satisfaction"

Control -> BMI

Dependents -> "Life Satisfaction"

Dependents -> BMI

Diet -> "Life Satisfaction"

Diet -> BMI

Income -> "Life Satisfaction"

Income -> Alcohol

Income -> BMI

Optimism -> "Life Satisfaction"

Optimism -> BMI

PA -> "Life Satisfaction"

PA -> BMI

Profession -> "Life Satisfaction"

Profession -> BMI

Purpose -> "Life Satisfaction"

Purpose -> BMI

Redeployed -> "Life Satisfaction"

Resilience -> "Life Satisfaction"

Resilience -> BMI

Rurality -> "Life Satisfaction"

Rurality -> BMI

SOC -> "Life Satisfaction"

SOC -> BMI

Shiftwork -> "Life Satisfaction"

Shiftwork -> BMI

Sleep -> "Life Satisfaction"

WFH -> "Life Satisfaction"

WFH -> BMI

}

## Sleep quality

dag {

bb="0,0,1,1"

"Age group" [pos="0.133,0.160"]

"Anxiety symptoms" [pos="0.587,0.041"]

"Caring resp" [pos="0.224,0.805"]

"Compassion fatigue" [latent,pos="0.939,0.131"]

"Depressive symp" [pos="0.379,0.053"]

"Education level" [pos="0.231,0.134"]

"Employment status" [pos="0.087,0.783"]

"Fear COVID" [pos="0.960,0.637"]

"Health S Utilisation" [pos="0.753,0.888"]

"Income concerns" [pos="0.072,0.296"]

"Job satisfaction" [pos="0.439,0.907"]

"Job stress" [pos="0.105,0.912"]

"Life Satisfaction" [outcome,pos="0.671,0.508"]

"Life events" [pos="0.190,0.036"]

"Marital status" [pos="0.046,0.047"]

"Neigh trust" [pos="0.278,0.034"]

"Psych safety" [pos="0.634,0.918"]

"Self-efficacy" [pos="0.770,0.047"]

"Self-reported health" [pos="0.745,0.737"]

"Sex at birth" [pos="0.088,0.581"]

"Sleep quality" [exposure,pos="0.259,0.548"]

"Social media" [pos="0.053,0.190"]

"Social support" [pos="0.943,0.421"]

"Work engage" [pos="0.539,0.885"]

"Workplace prep" [pos="0.374,0.828"]

Alcohol [pos="0.961,0.749"]

BMI [pos="0.957,0.856"]

Burnout [pos="0.492,0.040"]

Control [pos="0.970,0.315"]

Dependents [pos="0.045,0.685"]

Diet [pos="0.908,0.886"]

Income [pos="0.044,0.384"]

Optimism [pos="0.690,0.037"]

PA [pos="0.843,0.894"]

Profession [pos="0.045,0.889"]

Purpose [pos="0.965,0.557"]

Redeployed [pos="0.248,0.900"]

Resilience [pos="0.864,0.053"]

Rurality [pos="0.044,0.483"]

SOC [pos="0.964,0.214"]

Shiftwork [pos="0.343,0.927"]

WFH [pos="0.161,0.920"]

"Age group" -> "Life Satisfaction"

"Age group" -> "Sleep quality"

"Anxiety symptoms" -> "Life Satisfaction"

"Anxiety symptoms" -> "Sleep quality"

"Caring resp" -> "Life Satisfaction"

"Caring resp" -> "Sleep quality"

"Compassion fatigue" -> "Life Satisfaction"

"Depressive symp" -> "Life Satisfaction"

"Depressive symp" -> "Sleep quality"

"Education level" -> "Life Satisfaction"

"Education level" -> "Sleep quality"

"Employment status" -> "Life Satisfaction"

"Employment status" -> "Sleep quality"

"Employment status" -> Rurality

"Fear COVID" -> "Life Satisfaction"

"Fear COVID" -> "Sleep quality"

"Health S Utilisation" <-> "Sleep quality"

"Income concerns" -> "Life Satisfaction"

"Income concerns" -> "Sleep quality"

"Job satisfaction" -> "Life Satisfaction"

"Job satisfaction" -> "Sleep quality"

"Job stress" -> "Life Satisfaction"

"Job stress" -> "Sleep quality"

"Life Satisfaction" -> "Health S Utilisation"

"Life events" -> "Life Satisfaction"

"Life events" -> "Sleep quality"

"Marital status" -> "Life Satisfaction"

"Marital status" -> "Sleep quality"

"Neigh trust" -> "Life Satisfaction"

"Psych safety" -> "Job satisfaction"

"Psych safety" -> "Life Satisfaction"

"Psych safety" -> "Sleep quality"

"Self-efficacy" -> "Life Satisfaction"

"Self-reported health" -> "Life Satisfaction"

"Sex at birth" -> "Life Satisfaction"

"Sex at birth" -> "Sleep quality"

"Sex at birth" -> Rurality

"Sleep quality" -> "Self-efficacy"

"Sleep quality" -> "Self-reported health"

"Sleep quality" -> "Social media"

"Sleep quality" -> "Work engage"

"Sleep quality" -> Optimism

"Sleep quality" -> Resilience

"Social media" -> "Life Satisfaction"

"Social support" -> "Life Satisfaction"

"Social support" -> "Sleep quality"

"Work engage" -> "Life Satisfaction"

"Workplace prep" -> "Life Satisfaction"

"Workplace prep" -> "Sleep quality"

Alcohol -> "Life Satisfaction"

Alcohol -> "Sleep quality"

Alcohol -> BMI

BMI -> "Life Satisfaction"

BMI -> "Sleep quality"

Burnout -> "Life Satisfaction"

Burnout -> "Sleep quality"

Control -> "Life Satisfaction"

Control -> "Sleep quality"

Dependents -> "Life Satisfaction"

Dependents -> "Sleep quality"

Diet -> "Life Satisfaction"

Diet -> "Sleep quality"

Income -> "Life Satisfaction"

Income -> "Sleep quality"

Optimism -> "Life Satisfaction"

PA -> "Life Satisfaction"

PA -> "Sleep quality"

Profession -> "Life Satisfaction"

Profession -> "Sleep quality"

Purpose -> "Life Satisfaction"

Purpose -> "Sleep quality"

Redeployed -> "Life Satisfaction"

Redeployed -> "Sleep quality"

Resilience -> "Life Satisfaction"

Rurality -> "Life Satisfaction"

Rurality -> "Sleep quality"

SOC -> "Life Satisfaction"

SOC -> "Sleep quality"

Shiftwork -> "Life Satisfaction"

Shiftwork -> "Sleep quality"

WFH -> "Life Satisfaction"

WFH -> "Sleep quality"

}

## Diet

dag {

bb="0,0,1,1"

"Age group" [pos="0.095,0.126"]

"Anxiety symptoms" [pos="0.587,0.041"]

"Compassion fatigue" [latent,pos="0.939,0.131"]

"Depressive symp" [pos="0.379,0.053"]

"Education level" [pos="0.130,0.049"]

"Employment status" [pos="0.058,0.701"]

"Fear COVID" [pos="0.963,0.661"]

"Health S Utilisation" [pos="0.710,0.791"]

"Income concerns" [pos="0.049,0.260"]

"Job satisfaction" [pos="0.441,0.921"]

"Job stress" [pos="0.072,0.891"]

"Life Satisfaction" [outcome,pos="0.671,0.508"]

"Life events" [pos="0.190,0.036"]

"Neigh trust" [pos="0.266,0.032"]

"Psych safety" [pos="0.665,0.924"]

"Self-efficacy" [pos="0.770,0.047"]

"Self-reported health" [pos="0.807,0.901"]

"Sex at birth" [pos="0.033,0.587"]

"Social media" [pos="0.053,0.190"]

"Social support" [pos="0.951,0.461"]

"Work engage" [pos="0.539,0.885"]

"Workplace prep" [pos="0.381,0.857"]

Alcohol [pos="0.961,0.749"]

BMI [pos="0.957,0.856"]

Burnout [pos="0.492,0.040"]

Control [pos="0.970,0.315"]

Diet [exposure,pos="0.259,0.548"]

Income [pos="0.044,0.384"]

Optimism [pos="0.690,0.037"]

PA [pos="0.858,0.863"]

Profession [pos="0.052,0.808"]

Purpose [pos="0.965,0.557"]

Redeployed [pos="0.215,0.914"]

Resilience [pos="0.864,0.053"]

Rurality [pos="0.044,0.483"]

SOC [pos="0.964,0.214"]

Shiftwork [pos="0.289,0.870"]

Sleep [pos="0.927,0.935"]

WFH [pos="0.144,0.902"]

"Age group" -> "Life Satisfaction"

"Age group" -> Diet

"Anxiety symptoms" -> "Life Satisfaction"

"Anxiety symptoms" -> Diet

"Compassion fatigue" -> "Life Satisfaction"

"Depressive symp" -> "Life Satisfaction"

"Depressive symp" -> Diet

"Education level" -> "Life Satisfaction"

"Education level" -> Diet

"Employment status" -> "Life Satisfaction"

"Employment status" -> Diet

"Employment status" -> Rurality

"Fear COVID" -> "Life Satisfaction"

"Fear COVID" -> Diet

"Health S Utilisation" <-> Diet

"Income concerns" -> "Life Satisfaction"

"Income concerns" -> Diet

"Job satisfaction" -> "Life Satisfaction"

"Job satisfaction" -> Diet

"Job stress" -> "Life Satisfaction"

"Job stress" -> Diet

"Life Satisfaction" -> "Health S Utilisation"

"Life events" -> "Life Satisfaction"

"Life events" -> Diet

"Neigh trust" -> "Life Satisfaction"

"Psych safety" -> "Depressive symp"

"Psych safety" -> "Job satisfaction"

"Psych safety" -> "Life Satisfaction"

"Psych safety" -> Diet

"Self-efficacy" -> "Life Satisfaction"

"Self-efficacy" -> Diet

"Self-reported health" -> "Life Satisfaction"

"Sex at birth" -> "Life Satisfaction"

"Sex at birth" -> Diet

"Sex at birth" -> Rurality

"Social media" -> "Life Satisfaction"

"Social media" <-> Diet

"Social support" -> "Life Satisfaction"

"Social support" -> Diet

"Work engage" -> "Depressive symp"

"Work engage" -> "Job satisfaction"

"Work engage" -> "Life Satisfaction"

"Work engage" -> Diet

"Workplace prep" -> "Life Satisfaction"

"Workplace prep" -> Diet

Alcohol -> "Life Satisfaction"

Alcohol -> BMI

BMI -> "Life Satisfaction"

BMI -> Sleep

Burnout -> "Life Satisfaction"

Burnout -> Diet

Control -> "Life Satisfaction"

Control -> Diet

Diet -> "Self-reported health"

Diet -> BMI

Diet -> Sleep

Income -> "Life Satisfaction"

Income -> Alcohol

Income -> Diet

Optimism -> "Life Satisfaction"

Optimism -> Diet

PA -> "Life Satisfaction"

PA -> Diet

Profession -> "Life Satisfaction"

Profession -> Diet

Purpose -> "Life Satisfaction"

Redeployed -> "Life Satisfaction"

Redeployed -> Diet

Resilience -> "Life Satisfaction"

Rurality -> "Life Satisfaction"

Rurality -> Diet

SOC -> "Life Satisfaction"

SOC -> Diet

Shiftwork -> "Life Satisfaction"

Shiftwork -> Diet

Sleep -> "Life Satisfaction"

WFH -> "Life Satisfaction"

WFH -> Diet

}

# Medical and Surgical Outcomes

## Self-rated health and Life Satisfaction

dag {

bb="0,0,1,1"

"Age group" [pos="0.049,0.423"]

"Compassion fatigue" [latent,pos="0.937,0.148"]

"Depressive symptoms" [pos="0.890,0.030"]

"Education level" [pos="0.178,0.055"]

"Employment status" [pos="0.068,0.729"]

"Health S Utilisation" [pos="0.706,0.845"]

"Income concerns" [pos="0.082,0.075"]

"Job satisfaction" [pos="0.326,0.919"]

"Job stress" [pos="0.231,0.883"]

"Life Satisfaction" [outcome,pos="0.671,0.508"]

"Neigh trust" [pos="0.317,0.054"]

"Psych safety" [pos="0.421,0.880"]

"Self-efficacy" [pos="0.433,0.087"]

"Self-reported health" [exposure,pos="0.291,0.517"]

"Sex at birth" [pos="0.041,0.320"]

"Social media" [pos="0.252,0.062"]

"Social support" [pos="0.942,0.321"]

"Work engage" [pos="0.512,0.908"]

"Workplace prep" [pos="0.613,0.899"]

"life events" [pos="0.370,0.032"]

Alcohol [pos="0.802,0.888"]

Anxiety [pos="0.772,0.034"]

BMI [pos="0.953,0.515"]

Burnout [pos="0.880,0.112"]

Control [pos="0.955,0.417"]

Diet [pos="0.956,0.659"]

FoC [pos="0.945,0.252"]

Income [pos="0.060,0.210"]

Optimism [pos="0.703,0.033"]

PA [pos="0.952,0.905"]

Profession [pos="0.034,0.638"]

Purpose [pos="0.495,0.048"]

Redeployed [pos="0.073,0.922"]

Resilience [pos="0.582,0.047"]

Rurality [pos="0.036,0.527"]

SOC [pos="0.642,0.027"]

Shiftwork [pos="0.058,0.839"]

Sleep [pos="0.944,0.802"]

Smoking [pos="0.899,0.909"]

WFH [pos="0.149,0.894"]

"Age group" -> "Life Satisfaction"

"Age group" -> "Self-reported health"

"Compassion fatigue" -> "Life Satisfaction"

"Depressive symptoms" -> "Life Satisfaction"

"Depressive symptoms" -> "Self-reported health"

"Education level" -> "Life Satisfaction"

"Education level" -> "Self-reported health"

"Education level" -> Income

"Employment status" -> "Life Satisfaction"

"Employment status" -> "Self-reported health"

"Employment status" -> Income

"Income concerns" -> "Life Satisfaction"

"Income concerns" -> "Self-reported health"

"Job satisfaction" -> "Life Satisfaction"

"Job satisfaction" -> "Self-reported health"

"Job stress" -> "Job satisfaction"

"Job stress" -> "Life Satisfaction"

"Job stress" -> "Self-reported health"

"Job stress" -> Anxiety

"Life Satisfaction" -> "Health S Utilisation"

"Neigh trust" -> "Life Satisfaction"

"Neigh trust" -> "Self-reported health"

"Psych safety" -> "Depressive symptoms"

"Psych safety" -> "Job satisfaction"

"Psych safety" -> "Life Satisfaction"

"Psych safety" -> "Self-reported health"

"Psych safety" -> Anxiety

"Psych safety" -> Burnout

"Self-efficacy" -> "Life Satisfaction"

"Self-efficacy" -> "Self-reported health"

"Self-efficacy" -> Resilience

"Self-reported health" -> "Health S Utilisation"

"Self-reported health" -> "Life Satisfaction"

"Sex at birth" -> "Life Satisfaction"

"Sex at birth" -> "Self-reported health"

"Social media" -> "Life Satisfaction"

"Social media" -> "Self-reported health"

"Social support" -> "Life Satisfaction"

"Social support" -> "Self-reported health"

"Work engage" -> "Life Satisfaction"

"Work engage" -> "Self-reported health"

"Workplace prep" -> "Life Satisfaction"

"Workplace prep" -> "Self-reported health"

"life events" -> "Life Satisfaction"

"life events" -> "Self-reported health"

Alcohol -> "Self-reported health"

Alcohol -> Smoking

Anxiety -> "Depressive symptoms"

Anxiety -> "Life Satisfaction"

Anxiety -> "Self-reported health"

BMI -> "Life Satisfaction"

BMI -> "Self-reported health"

BMI -> Sleep

Burnout -> "Life Satisfaction"

Burnout -> "Self-reported health"

Control -> "Life Satisfaction"

Control -> "Self-reported health"

Diet -> "Life Satisfaction"

Diet -> "Self-reported health"

FoC -> "Life Satisfaction"

FoC -> "Self-reported health"

Income -> "Income concerns"

Income -> "Life Satisfaction"

Income -> "Self-reported health"

Optimism -> "Life Satisfaction"

Optimism -> "Self-reported health"

PA -> "Life Satisfaction"

PA -> "Self-reported health"

PA -> Sleep

Profession -> "Life Satisfaction"

Profession -> "Self-reported health"

Purpose -> "Life Satisfaction"

Redeployed -> "Life Satisfaction"

Redeployed -> "Self-reported health"

Resilience -> "Life Satisfaction"

Resilience -> "Self-reported health"

Rurality -> "Life Satisfaction"

SOC -> "Life Satisfaction"

SOC -> "Self-reported health"

Shiftwork -> "Life Satisfaction"

Shiftwork -> "Self-reported health"

Sleep -> "Life Satisfaction"

Smoking -> "Life Satisfaction"

Smoking -> "Self-reported health"

WFH -> "Life Satisfaction"

WFH -> "Self-reported health"

}

## Health service utilisation

dag {

bb="0,0,1,1"

"Age group" [pos="0.095,0.126"]

"Anxiety symptoms" [pos="0.587,0.041"]

"Compassion fatigue" [latent,pos="0.939,0.131"]

"Depressive symp" [pos="0.379,0.053"]

"Education level" [pos="0.130,0.049"]

"Employment status" [pos="0.058,0.701"]

"Fear COVID" [pos="0.925,0.627"]

"Health service utilisation" [exposure,pos="0.259,0.548"]

"Income concerns" [pos="0.049,0.260"]

"Job satisfaction" [pos="0.443,0.917"]

"Job stress" [pos="0.072,0.891"]

"Life Satisfaction" [outcome,pos="0.671,0.508"]

"Life events" [pos="0.190,0.036"]

"Neigh trust" [pos="0.266,0.032"]

"Psych safety" [pos="0.634,0.918"]

"Self-efficacy" [pos="0.770,0.047"]

"Self-reported health" [pos="0.788,0.923"]

"Sex at birth" [pos="0.033,0.587"]

"Social media" [pos="0.053,0.190"]

"Social support" [pos="0.951,0.461"]

"Work engage" [pos="0.539,0.885"]

"Workplace prep" [pos="0.374,0.827"]

Alcohol [pos="0.912,0.730"]

BMI [pos="0.957,0.856"]

Burnout [pos="0.492,0.040"]

Control [pos="0.970,0.315"]

Diet [pos="0.707,0.871"]

Income [pos="0.044,0.384"]

Optimism [pos="0.690,0.037"]

PA [pos="0.850,0.928"]

Profession [pos="0.052,0.808"]

Purpose [pos="0.965,0.557"]

Redeployed [pos="0.215,0.914"]

Resilience [pos="0.864,0.053"]

Rurality [pos="0.044,0.483"]

SOC [pos="0.964,0.214"]

Shiftwork [pos="0.290,0.876"]

Sleep [pos="0.927,0.935"]

WFH [pos="0.144,0.902"]

"Age group" -> "Health service utilisation"

"Age group" -> "Life Satisfaction"

"Anxiety symptoms" -> "Health service utilisation"

"Anxiety symptoms" -> "Life Satisfaction"

"Compassion fatigue" -> "Life Satisfaction"

"Depressive symp" -> "Health service utilisation"

"Depressive symp" -> "Life Satisfaction"

"Education level" -> "Health service utilisation"

"Education level" -> "Life Satisfaction"

"Employment status" -> "Health service utilisation"

"Employment status" -> "Life Satisfaction"

"Employment status" -> Rurality

"Fear COVID" -> "Health service utilisation"

"Fear COVID" -> "Life Satisfaction"

"Fear COVID" -> BMI

"Health service utilisation" <-> "Social media"

"Income concerns" -> "Health service utilisation"

"Income concerns" -> "Life Satisfaction"

"Job satisfaction" -> "Health service utilisation"

"Job satisfaction" -> "Life Satisfaction"

"Job stress" -> "Health service utilisation"

"Job stress" -> "Life Satisfaction"

"Life events" -> "Health service utilisation"

"Life events" -> "Life Satisfaction"

"Neigh trust" -> "Life Satisfaction"

"Psych safety" -> "Depressive symp"

"Psych safety" -> "Health service utilisation"

"Psych safety" -> "Job satisfaction"

"Psych safety" -> "Life Satisfaction"

"Self-efficacy" -> "Health service utilisation"

"Self-efficacy" -> "Life Satisfaction"

"Self-reported health" -> "Health service utilisation"

"Self-reported health" -> "Life Satisfaction"

"Sex at birth" -> "Health service utilisation"

"Sex at birth" -> "Life Satisfaction"

"Social media" -> "Life Satisfaction"

"Social support" -> "Health service utilisation"

"Social support" -> "Life Satisfaction"

"Work engage" -> "Depressive symp"

"Work engage" -> "Health service utilisation"

"Work engage" -> "Job satisfaction"

"Work engage" -> "Life Satisfaction"

"Workplace prep" -> "Health service utilisation"

"Workplace prep" -> "Life Satisfaction"

Alcohol -> "Health service utilisation"

Alcohol -> "Life Satisfaction"

Alcohol -> BMI

BMI -> "Health service utilisation"

BMI -> "Life Satisfaction"

Burnout -> "Health service utilisation"

Burnout -> "Life Satisfaction"

Control -> "Health service utilisation"

Control -> "Life Satisfaction"

Diet -> "Health service utilisation"

Diet -> "Life Satisfaction"

Income -> "Health service utilisation"

Income -> "Life Satisfaction"

Income -> Alcohol

Optimism -> "Health service utilisation"

Optimism -> "Life Satisfaction"

PA -> "Health service utilisation"

PA -> "Life Satisfaction"

Profession -> "Health service utilisation"

Profession -> "Life Satisfaction"

Purpose -> "Life Satisfaction"

Redeployed -> "Health service utilisation"

Redeployed -> "Life Satisfaction"

Resilience -> "Life Satisfaction"

Rurality -> "Health service utilisation"

Rurality -> "Life Satisfaction"

SOC -> "Health service utilisation"

SOC -> "Life Satisfaction"

Shiftwork -> "Health service utilisation"

Shiftwork -> "Life Satisfaction"

Sleep -> "Health service utilisation"

Sleep -> "Life Satisfaction"

WFH -> "Health service utilisation"

WFH -> "Life Satisfaction"

}
