# Supplementary material for: Key salutogenic factors associated with wellbeing among a cohort of regional and rural healthcare workers during the COVID-19 pandemic: an exposure-wide cross-sectional study
Source: Research Square preprint supplement (doi:10.21203/rs.3.rs-7452925/v1), 2025-10-01
Supplement: Supplementary file 2 [file 3ef8ad71fbf41dea1c91d861.docx]

**S2 Table.** A-priori confounding variables adjusted in the linear regression models examining the associations of the exposure/independent variables with the life satisfaction outcome variable, identified through directed acyclic graphs.

| **Independent Variable** | **Life Satisfaction Confounding variables** |
| --- | --- |
| **Sex at birth** | No adjustment required |
| **Age** | No adjustment required |
| **Rurality** | Sex at Birth  Education  Profession |
| **Annual income** | Age  Profession  Sex at birth  Rurality  Employment status  Life events  Redeployed |
| **Income concern** | Age  Sex at Birth  Rurality  Annual income  Education  Employment status  Life events  Profession  Redeployed  Psychological resilience  Perceived control |
| **Marital status** | Life events  Education  Age  Income concern  Rurality  Employment status  Profession  Job stress  Job satisfaction  Alcohol consumption  Optimism  Depressive symptoms  Anxiety symptoms |
| **Education** | Sex at birth  Age  Rurality  Social support |
| **Dependents** | Life events  Education  Age  Marital status  Annual income  Rurality  Sex at birth  Employment status  Profession  Years in profession  Health status  Physical activity  BMI  Social support  Perceived control  Optimism |
| **Life events** | Age  Annual income  Rurality  Sex at birth  Employment status  Profession  Purpose |
| **Employment status** | Sex at birth  Age  Rurality  Profession  Health status  Life events  Education  Purpose  Psychological resilience  Social support |
| **Profession** | Sex at birth  Age  Education  Purpose  Psychological resilience |
| **Years in Profession** | Life events  Education  Age  Marital status  Sex at birth  Employment status  Profession |
| **Redeployed** | Education  Life events  Sex at birth  Age  Employment status  Profession  Years in profession |
| **Working arrangement** | Education  Age  Rurality  Sex at birth  Employment status  Profession  Years in profession |
| **Perceived workplace preparedness** | Education  Sex at birth  Age  Rurality  Employment status  Profession  Years in profession  Redeployed  Working arrangement |
| **Work engagement** | Life events  Education  Age  Income concern  Annual income  Rurality  Sex at birth  Employment status  Profession  Working arrangement  Redeployed  Workplace preparedness  Fear of COVID  Purpose  Social support |
| **Job satisfaction** | Psychological resilience  Income concern  Sex at birth  Age  Rurality  Employment status  Profession  Working arrangement  Workplace preparedness  Fear of COVID  Purpose  Social support |
| **Job stress** | Life events  Education  Age  Income concern  Annual income  Rurality  Sex at birth  Employment status  Profession  Working arrangement  Redeployed  Workplace preparedness  Fear of COVID  Purpose  Psychological resilience |
|  |  |
| **Direct care COVID-19** | Rurality  Age  Education  Employment status  Profession  Psychological resilience |
| **Fear of COVID-19** | Marital status  Life events  Education  Age  Rurality  Sex at birth  Employment status  Dependents  Profession  Redeployed  Workplace preparedness  Psychological resilience  Optimism |
| **Depressive symptoms** | Life events  Education  Age  Income concern  Rurality  Sex at birth  Employment status  Profession  Job stress  Working arrangement  Redeployed  Workplace preparedness  Job satisfaction  Work engagement  Fear of COVID  Purpose  Social support  Psychological resilience  Optimism  Anxiety symptoms |
| **Anxiety symptoms** | Life events  Education  Age  Income concern  Annual income  Rurality  Sex at birth  Employment status  Profession  Working arrangement  Redeployed  Workplace preparedness  Psychological resilience  Optimism  Depressive symptoms  Work engagement  Fear of COVID-19  Purpose  Social support |
| **Optimism** | Life events  Education  Age  Annual income  Rurality  Sex at birth  Employment status  Profession  Physical activity  Sleep  BMI  Psychological resilience  Social support |
| **Psychological resilience** | Optimism  Education  Age  Sex at birth  Rurality  Employment status  Redeployed  Working arrangements  Workplace preparedness  Social support  Life events |
| **Perceived control** | Life events  Education  Age  Annual income  Rurality  Sex at birth  Employment status  Profession  Working arrangement  Redeployed  Workplace preparedness  Psychological resilience  Optimism  Job satisfaction  Fear of COVID  Purpose  Social support |
| **Social support** | Marital status  Life events  Education Age  Annual income  Rurality  Sex at birth  Employment status  Profession  Working arrangement  Redeployed  Work engagement  Job satisfaction  Psychological resilience |
| **Purpose** | Sex at birth  Age  Education  Profession  Job stress  Self-reported health  Social support |
| **Sense of coherence** | Sex at birth  Annual income  Education  Life events  Fear of COVID |
| **Health status** | Life events  Education  Income concern  Sex at birth  Age  Profession  Employment status  Redeployed  Working arrangement  Job stress  Job satisfaction  Work engagement  Workplace preparedness  Alcohol  Physical activity  BMI  Social support  Fear of COVID  Depressive symptoms  Anxiety symptoms  Optimism  Psychological resilience |
| **Health service utilisation** | Life events  Education  Age  Income concern  Annual income  Rurality  Sex at birth  Employment status  Profession  Job stress  Working arrangement  Redeployed  Workplace preparedness  Job satisfaction  Work engagement  Self-reported health  Physical activity  Sleep  BMI  Alcohol  Fear of COVID  Social support  Perceived control  Optimism  Depressive symptoms  Anxiety symptoms |
| **BMI** | Life events  Education  Age  Income concern  Annual income  Rurality  Sex at birth  Dependents  Employment status  Profession  Job stress  Working arrangement  Job satisfaction  Physical activity  Purpose  Social support  Perceived control  Psychological resilience  Optimism  Anxiety symptoms  Depressive symptoms |
| **Physical activity** | Marital status  Life events  Education  Age  Annual income  Rurality  Sex at birth  Dependents  Employment status  Profession  Job stress  Working arrangement  Redeployed  Sel-reported health  Sleep  Social support  Psychological resilience  Optimism  Anxiety symptoms  Depressive symptoms |
| **Sleep quality** | Life events  Education  Age  Marital status  Income concern  Annual income  Rurality  Sex at birth  Dependents  Employment status  Profession  Job stress  Working arrangements  Redeployed  Workplace preparedness  Job satisfaction  Physical activity  BMI  Alcohol  Fear of COVID  Purpose  Social support  Depressive symptoms  Anxiety symptoms |
| **Alcohol risk** | Marital status  Life events  Education  Age  Income concern  Annual income  Rurality  Sex at birth  Dependents  Employment status  Profession  Job stress  Working arrangements  Redeployed  Workplace preparedness  Job satisfaction  Work engagement  Fear of COVID  Purpose  Social support  Psychological resilience  Optimism  Anxiety symptoms  Depressive symptoms |

*Note.* The list of potential confounding variables was chosen a priori using existing literature and based on the traditional definition of a confounder (Shrier & Platt, 2008). The minimum sufficient adjustment set of variables for each model was determined using directed acyclic graphs. BMI: Body Mass Index. PHQ-9: Patient Health Questionnaire, 9-item. GAD-7: Generalised Anxiety Disorder scale, 7-item. PPE: personal protective equipment. PTSD: post-traumatic stress disorder.

**References**

Shrier, I., & Platt, R. W. (2008). Reducing bias through directed acyclic graphs. *BMC Medical Research Methodology*, *8*(1), 70. <https://doi.org/10.1186/1471-2288-8-70>
