# Supplementary material for: Key salutogenic factors associated with wellbeing among a cohort of regional and rural healthcare workers during the COVID-19 pandemic: an exposure-wide cross-sectional study
Source: Research Square preprint supplement (doi:10.21203/rs.3.rs-7452925/v1), 2025-10-01
Supplement: Supplementary file 3 [file 3f2d16cd7070676ccf26fcdf.docx]

**S1 Table.** Confounding variables assessment, coding, and assigned reference group.

| **Independent Variable** | **Assessment** | **Coding** | **Reference group** |
| --- | --- | --- | --- |
| **Sex at birth** | What was your sex at birth?  Response options:  - Male  - Female  - Other  - Prefer not to say | Male  Female  (Other/prefer not to say were designated missing) | Female |
| **Age** | What is your age category?  Response options:  - 18-24 years old  - 25-34 years old  - 35-44 years old  - 45-54 years old  - 55-64 years old  - 65-74 years old  - 75 years or older | < 45 years old  ≥45 years old | ≥45 years old |
| **Rurality** | Participants were asked to report their residential address postcode.  The Modified Monash (MM) model was used to categorise participants’ residential address postcodes into one of the following categories:  MM1 = metropolitan areas  MM2 = regional centres  MM3 = large rural town  MM4 = medium rural town  MM5 = small rural towns  MM6 = remote communities  MM7 = very remote communities  (https://www.health.gov.au/topics/rural-health-workforce/classifications/mmm) | Monash Modified 1-2  Monash Modified 3-7 | Monash Modified 1-2 |
| **Annual income** | What is your current weekly (annual equivalent) household income?  Response options:  -$1- $199 ($1- $10,399)  -$200 - $299 ($10,400 - $15,599)  -$300 - $399 ($15,600 -$20,799)  -$400 -$599 ($20,800 - $31,199)  -$600 - $799 ($31,200 - $41,599)  -$800 - $999 ($41,600 - $51,999)  -$1000 - $1249 ($52,000 - $64,999)  -$1250 - $1499 ($65,000 - $77,999)  -$1500 - $1,999 ($78,000 - $103,999)  -$2000 or more ($104,000 or more) | <AU$52000/year  ≥AU$52000/year | ≥AU$52000/year |
| **Income concerns** | As a result of the COVID-19 pandemic, do you have concerns or worries about your household income?  Response options:  - No  - Yes | No  Yes | No |
| **Marital status** | What is your marital status?  Response options:  - Married  - De facto/Living with partner  - Widowed  - Divorced/separated  - Never married  - Prefer not to say | Married/Defacto  Not married/De facto  All other categories combined | Married/Defacto |
| **Education level** | What is your highest education level?  Response options:  - Primary schooling only  - Secondary schooling not completed  - Secondary schooling completed  - Trade qualification/TAFE  - University/other tertiary  - Other | University/other tertiary  All other categories combined | University/other tertiary |
|  |  |  |  |
| **Dependents** | How many dependent children do you have?  Response options:  - 1  - 2  - 3  - 4  - 5  - 6  - 7  - 8  - 9  - >10 | Yes  No | Yes |
| **Life events** | Use Question 152 only of Recent Life Events scale  (Range 13-24)  Please indicate whether any of the following life events listed below have happened to you in the past 12 months.  Response options:   - Close relative/family member hospitalised - Family member died - Arguments/marital difficulties - Separated/relationship breakdown - Serious arguments with household member - Serious argument with close friend, neighbour relative not living in same household - Unemployed/seeking employment for a month or more - Sacked/downgraded at work - Major financial crisis - Involved in accident with serious risk to own health or life of yourself or others - Other adverse event | No (score of 24)  Yes (score of <24) | Yes |
| **Employment status** | Currently, what is your employment status?  Response options:  - Full time  - Part time  - Casual  - Retired  - Volunteer  - Other | Full time/All other categories | All other categories |
| **Profession** | What is your primary profession or work background?  Participants were given a drop-down of multiple different options (e.g., general practitioner, health service assistant, youth worker etc.) | Medicine  Nursing  Allied Health  Non-clinical | Nursing (the sample size for medicine was too small to have as a reference group) |
| **Years in Profession** | How many years have you worked in your primary profession since graduation?  Response options:  0 - 5 years  6 - 10 years  11 - 15 years More than 15 years | ≥10 years  <10 years | ≥10 years |
| **Redeployment** | Since the start of the COVID-19 pandemic, have you been redeployed to a new area of work (i.e. change in the department you work in)? | Yes  No | No |
| **Working arrangement** | Where did you perform your work duties during the COVID-19 pandemic?  Response options:  - Exclusively at home  - Exclusively at your place of employment (on site)  A combination of home and place of employment (mixed) | Home  Place of employment  Combination | Place of work |
| **Perceived workplace preparedness** | When the COVID-19 pandemic was declared how prepared was your workplace to respond to those with known or suspected COVID-19?  Response options:  - Very prepared  - Moderately prepared  - Somewhat prepared  - A little prepared  - Not prepared at all  - Unsure | High preparedness (very/moderately)  Low preparedness (all other categories) | High preparedness |
| **Work engagement** | Utrecht Work Engagement Scale (UWES) (Schaufeli et al., 2019)  Total score range: 0-6  Higher scores indicate greater work engagement. | Continuous |  |
| **Job satisfaction** | Satisfaction with Work Scale (SWWS) (Merino et al., 2021)  Total score range: 5-35  Higher scores indicate greater job satisfaction. | Continuous variable |  |
| **Job stress** | Job Stress Scale  (Parker & DeCotiis, 1983)  Total score range: 1-5  Higher scores indicate greater job-related stress. | Continuous variable |  |
| **Direct contact with COVID-19 patients** | Have you had direct contact (i.e., diagnosed, treated, or provided care) with suspected/infected COVID-19 patients?  Response options:  -Yes  -No  -Not applicable to my role | Yes  No/not applicable to my role | No/not applicable to my role |
| **Fear of COVID-19** | Fear of COVID-19 scale  (Ahorsu et al., 2022)  Total score range: 7-35  Higher scores indicate greater COVID-19 related fear. | Continuous variable |  |
| **Depressive symptoms** | Patient Health Questionnaire (PHQ-9) (9-items) (Kroenke et al., 2001)  Total score range: 0-27  Higher scores indicate greater degree of depressive symptoms | Continuous variable |  |
| **Anxiety symptoms** | Generalised Anxiety Disorder -7 (GAD-7) (7-items) (Spitzer et al., 2006)  Total score range: 0-21  Higher scores indicate greater degree of anxiety symptoms. | Continuous variable |  |
| **Optimism** | Two items from Life Orientation Test-Revised (LOT-R) (2-items) (Scheier et al., 1994)   1. "In uncertain times, I usually expect the best." 2. "I'm always optimistic about my future."   Total score range: 0-24  Higher scores indicate greater optimism. | Continuous variable |  |
|  |  |  |  |
| **Resilience** | Brief Resilience Scale  (Smith et al., 2008)  Total score range: 1-5  Higher scores indicate greater psychological resilience. | Continuous variable |  |
| **Perceived control** | Life Control scale (LCS) (Lee et al., 2009)  Total score range: 0-30  Higher scores indicate greater perceived control. | Continuous variable |  |
|  |  |  |  |
| **Social support** | Duke Social Support Index (DSSI-11)  (Koenig et al., 1993) | Continuous variable |  |
|  | Total score range: 10-32  Higher scores indicate greater social support. |  |  |
| **Purpose** | One item from the Mental Health Continuum Short Form (Orpana et al., 2017). This question asks, “During the past month, how often did you feel that your life has a sense of direction or meaning to it?”  Response options and range:  0 (Never) to 5 (Every day) with a higher score indicating greater purpose in life. | Continuous variable |  |
| **Sense of coherence** | Sense of coherence scale (SOC-13) (Antonovsky, 1987)  Total score range: 28-91  Higher scores indicate greater sense of coherence. | Continuous variable |  |
| **Self-reported health** | Used Question 1 from the 12-item Short Form survey (SF-12):  "In general, would you say your health is:"  Response options are:  Excellent/Very good  Good/Fair/Poor | Categorical variable |  |
| **Health service utilisation** | Please select the response that best reflects the number of visits/online consultations (including mental health) you may have had with each of the following health care providers for any reason regarding your own health, since the start of the COVID-19 pandemic (i.e. February 2020).  Used sum of response options including:  - GP  - Psychologist  - Psychiatrist  - Drug and alcohol counsellor  - Mental health nurse | Continuous variable |  |
| **Body Mass Index (BMI)** | We would like to know your height and weight, so that we can calculate your body mass index (BMI). | Continuous variable |  |
| **Physical activity** | International Physical Activity Questionnaire short form (7-item)  (Craig et al., 2017)  Scores are calculated based on time, frequency, and intensity of exercise. | Low activity  Moderate activity  High activity | High activity |
|  |  |  |  |
| **Sleep quality** | Pittsburgh Sleep Quality Index (10-item)  (Buysse et al., 1989)  Total score range = 0-21  Score cut-off: >5 significant sleep disturbances. | Continuous variable |  |
|  |  |  |  |
| **Alcohol consumption risk** | AUDIT Alcohol Screening Tool (3-item)  (Bush et al., 1998)  Total score range: 0-12  -Low risk (0-4),  -Moderate risk (5-7),  -High risk (8-10)  -Possible dependence (11-12)  Higher scores indicate more risky drinking behaviour. | Low risk  Moderate risk  High risk | Low risk |
| **Outcome Variable** | **Assessment** | **Coding** | **Reference group** |
| **Life satisfaction** | Personal Wellbeing Index Adult (PWI-A) Question 1 only:  “How satisfied are you with your life as a whole?”  Responses are measured on a 10-point Likert scale ranging from 0 (no satisfaction at all), to 10 (completely satisfied) with participants receiving a life satisfaction score out of 10.  Total score range 0-10 | Continuous variable |  |

**References**

Ahorsu, D. K., Lin, C. Y., Imani, V., Saffari, M., Griffiths, M. D., & Pakpour, A. H. (2022). The Fear of COVID-19 Scale: Development and Initial Validation. *Int J Ment Health Addict*, *20*(3), 1537-1545. <https://doi.org/10.1007/s11469-020-00270-8>

Antonovsky, A. (1987). *Unraveling the mystery of health.* San Francisco: Jossey-Bass.

Bush, K., Kivlahan, D. R., McDonell, M. B., Fihn, S. D., & Bradley, K. A. (1998). The AUDIT alcohol consumption questions (AUDIT-C): an effective brief screening test for problem drinking. Ambulatory Care Quality Improvement Project (ACQUIP). Alcohol Use Disorders Identification Test. *Arch Intern Med*, *158*(16), 1789-1795. <https://doi.org/10.1001/archinte.158.16.1789>

Buysse, D. J., Reynolds, C. F., 3rd, Monk, T. H., Berman, S. R., & Kupfer, D. J. (1989). The Pittsburgh Sleep Quality Index: a new instrument for psychiatric practice and research. *Psychiatry Research*, *28*(2), 193-213. <https://doi.org/10.1016/0165-1781(89)90047-4>

Craig, C., Marshall, A., Sjostrom, M., Bauman, A., Lee, P., Macfarlane, D., Lam, T., & Stewart, S. (2017). International physical activity questionnaire-short form. *J Am Coll Health*, *65*(7), 492-501.

Koenig, H. G., Westlund, R. E., George, L. K., Hughes, D. C., Blazer, D. G., & Hybels, C. (1993). Abbreviating the Duke Social Support Index for Use in Chronically Ill Elderly Individuals. *Psychosomatics (Washington, D.C.)*, *34*(1), 61-69. <https://doi.org/10.1016/S0033-3182(93)71928-3>

Kroenke, K., Spitzer, R. L., & Williams, J. B. W. (2001). The PHQ-9. *Journal of General Internal Medicine*, *16*(9), 606-613. <https://doi.org/10.1046/j.1525-1497.2001.016009606.x>

Lee, C., Ford, J., & Gramotnev, H. (2009). The Life Control Scale: Validation with a Population Cohort of Middle-Aged Australian Women. *International journal of behavioral medicine*, *16*(2), 148-157. <https://doi.org/10.1007/s12529-008-9013-5>

Merino, M. D., Privado Zamorano, J., & Durán, R. (2021). Satisfaction with Life Scale (SWLS) adapted to work: Psychometric Properties of the Satisfaction with Work Scale (SWWS). *Anales de psicología (Murcia, Spain)*, *37*(3), 557-566. <https://doi.org/10.6018/analesps.430801>

Parker, D. F., & DeCotiis, T. A. (1983). Organizational determinants of job stress. *Organizational behavior and human performance*, *32*(2), 160-177.

Schaufeli, W. B., Shimazu, A., Hakanen, J., Salanova, M., & De Witte, H. (2019). An Ultra-Short Measure for Work Engagement: The UWES-3 Validation Across Five Countries. *European journal of psychological assessment : official organ of the European Association of Psychological Assessment*, *35*(4), 577-591. <https://doi.org/10.1027/1015-5759/a000430>

Scheier, M. F., Carver, C. S., & Bridges, M. W. (1994). Distinguishing Optimism From Neuroticism (and Trait Anxiety, Self-Mastery, and Self-Esteem): A Reevaluation of the Life Orientation Test. *Journal of personality and social psychology*, *67*(6), 1063-1078. <https://doi.org/10.1037/0022-3514.67.6.1063>

Smith, B. W., Dalen, J., Wiggins, K., Tooley, E., Christopher, P., & Bernard, J. (2008). The brief resilience scale: assessing the ability to bounce back. *Int J Behav Med*, *15*(3), 194-200. <https://doi.org/10.1080/10705500802222972>

Spitzer, R. L., Kroenke, K., Williams, J. B., & Löwe, B. (2006). A brief measure for assessing generalized anxiety disorder: the GAD-7. *Archives of internal medicine*, *166*(10), 1092-1097.
